# Supplementary material for: How the electron-deficient Cp ligand facilitates Rh-catalyzed annulations with alkynes
Source: Royal Society of Chemistry journal article supplement (doi:10.1039/d1qo01566d), 2021-12-06
Supplement: d1qo01566d1.pdf [file d1qo01566d1.pdf]

## Electronic Supplementary Information

### How electron-deficient Cp ligand facilitates Rh-catalyzed annulations with alkynes

Han Gao,<sup>a</sup> Lingfei Hu,<sup>a</sup> Yanlei Hu,<sup>a</sup> Xiangying Lv,<sup>a</sup> Yan-Bo Wu<sup>b</sup> and Gang Lu<sup>\*a</sup>

<sup>a</sup> School of Chemistry and Chemical Engineering, Key Laboratory of Colloid and Interface Chemistry, Ministry of Education, Shandong University, Jinan, Shandong 250100, China

<sup>b</sup> Key Lab for Materials of Energy Conversion and Storage of Shanxi Province and Key Lab of Chemical Biology and Molecular Engineering of Ministry of Education, Institute of Molecular Science, Shanxi University, Taiyuan, Shanxi 030006, China

Corresponding Author: [ganglu@sdu.edu.cn](mailto:ganglu@sdu.edu.cn)

#### Table of Contents

|                                                                                                                                |    |
|--------------------------------------------------------------------------------------------------------------------------------|----|
| <b>Comparison of the Barriers of Alkyne Insertion with Cp<sup>X</sup>-Rhodacycles Using Different Levels of Theories</b> ..... | S2 |
| <b>Less Favorable Pathways for C–H Activations</b> .....                                                                       | S3 |
| <b>Comparable <math>\pi</math>(<math>\pi</math> Pauli Repulsion in TS5a and TS5b</b> .....                                     | S4 |
| <b>Energy Terms of EDA along IRC</b> .....                                                                                     | S5 |
| <b>Cartesian Coordinates (Å) and Energies of the Optimized Structures</b> .....                                                | S7 |

## Comparison of the Barriers of Alkyne Insertion with Cp<sup>X</sup>-Rhodacycles Using Different Levels of Theories

The barriers of alkyne insertion with Cp<sup>X</sup>-Rh(III) were calculated using a few popular modern density functionals and basis sets (Table S1). The trend of Cp<sup>E</sup>-promoted reactivity of alkyne insertion, i.e., the relative free energies ( $\Delta\Delta G_{\text{sol}}^{\ddagger}$ ) of **TS2b** vs **TS2a** and **TS5b** vs **TS5a**, is minimally affected by the choice of density functionals and basis sets. Thus, a more commonly used combination of computational methods, M06 for single-point calculations and B3LYP for geometry optimization, was chosen in the present study. Due to the better efficiency in EDA calculations, the basis set of def2-TZVP for single-point energy calculation is thus chosen in this study.

**Table S1. Comparison of barriers (in kcal/mol) of alkyne insertions (TS2a vs TS2b; TS5a vs TS5b)**

| Method for Single Point Energy Calculation | Method for Geometry Optimization | $\Delta\Delta G_{\text{sol}}^{\ddagger}$<br>(TS2b w/ Cp <sup>E</sup> – TS2a w/ Cp <sup>*</sup> ) | $\Delta\Delta G_{\text{sol}}^{\ddagger}$<br>(TS5b w/ Cp <sup>E</sup> – TS5a w/ Cp <sup>*</sup> ) |
|--------------------------------------------|----------------------------------|--------------------------------------------------------------------------------------------------|--------------------------------------------------------------------------------------------------|
| M06/def2-TZVP                              | B3LYP/LANL2DZ–6-31G(d)           | –7.4                                                                                             | –3.3                                                                                             |
| M06-D3/def2-TZVP                           |                                  | –8.0                                                                                             | –4.6                                                                                             |
| B3LYP-D3/def2-TZVP                         |                                  | –7.1                                                                                             | –4.1                                                                                             |
| B97D3/def2-TZVP                            |                                  | –7.1                                                                                             | –3.4                                                                                             |
| $\omega$ B97xD/def2-TZVP                   |                                  | –6.6                                                                                             | –4.0                                                                                             |
| M06/SDD–6-311+G(d,p)                       |                                  | –7.9                                                                                             | –4.2                                                                                             |
| M06-D3/SDD–6-311+G(d,p)                    |                                  | –9.2                                                                                             | –5.1                                                                                             |
| B3LYP-D3/SDD–6-311+G(d,p)                  |                                  | –8.4                                                                                             | –4.5                                                                                             |
| B97D3/SDD–6-311+G(d,p)                     |                                  | –7.7                                                                                             | –3.9                                                                                             |
| $\omega$ B97xD/SDD–6-311+G(d,p)            |                                  | –7.6                                                                                             | –4.4                                                                                             |

## Less Favorable Pathways for C–H Activations

To compare with the cationic pathway for acetanilide **1a** (Fig. 1) and the neutral pathway for 2-phenyl-2-propanol **1b** (Fig. 4), we computed the neutral and cationic pathways for **1a** (Fig. S1) and **1b** (Fig. S2), respectively. The neutral N-directing transition states for C–H metalations (**TS8a** with  $\Delta G^\ddagger = 24.3$  kcal/mol and **TS8b** with  $\Delta G^\ddagger = 19.9$  kcal/mol, Fig. S1) are less favorable than the cationic O(carbonyl)-directing transition states (**TS1a** with  $\Delta G^\ddagger = 20.4$  kcal/mol and **TS1b** with  $\Delta G^\ddagger = 16.5$  kcal/mol, Fig. 1). The cationic OH-directing transition states for C–H metalations (**TS9a** with  $\Delta G^\ddagger = 25.3$  kcal/mol and **TS9b** with  $\Delta G^\ddagger = 22.9$  kcal/mol, Fig. S2) are less favorable than the neutral O-directing transition states (**TS4a** with  $\Delta G^\ddagger = 23.3$  kcal/mol and **TS4b** with  $\Delta G^\ddagger = 21.8$  kcal/mol, Fig. 4). Therefore, the ligand effects ( $\text{Cp}^*$  vs  $\text{Cp}^E$ ) on the rate-determining alkyne insertion step are discussed based on the more favorable cationic pathway for substrate **1a** and neutral pathway for substrate **1b**.

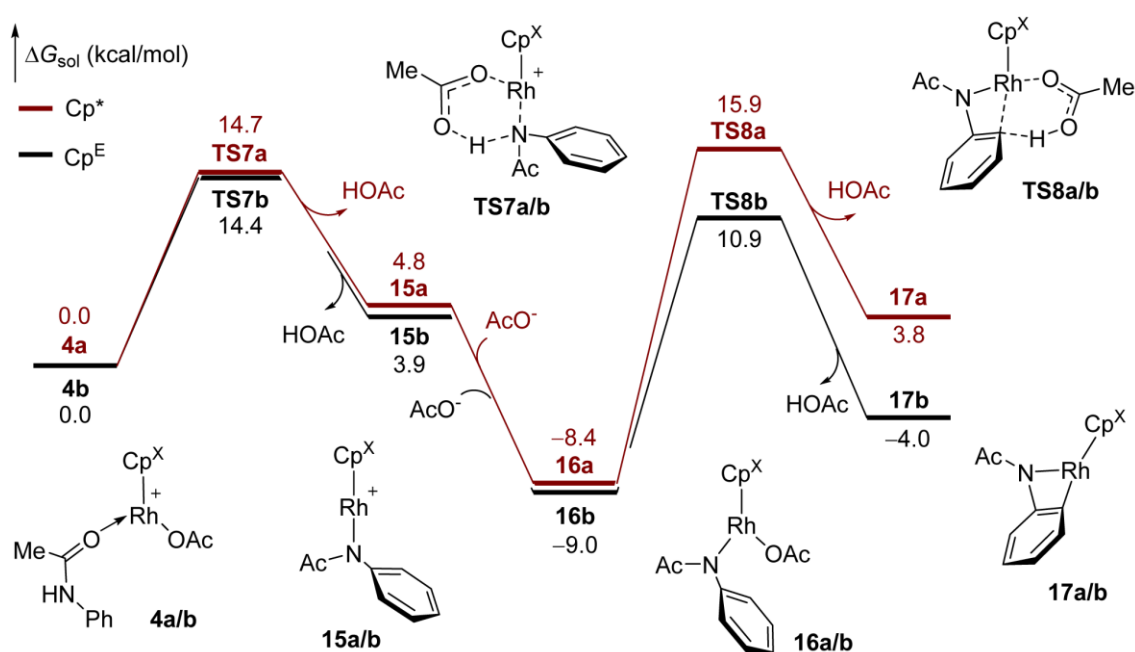

**Fig. S1.** Energy profile of the neutral N-directing C–H activation.



## Energy Terms of EDA along IRC

**Table S2. EDA energy terms of alkyne insertion with Cp\* (TS2a) along IRC**

| Energy terms<br>(in kcal/mol)<br>$r(\text{C-C})$<br>in <b>TS2a</b> (in Å) | $\Delta E_{\text{dist}}$ | $\Delta E_{\text{Pauli}}$ | $\Delta E_{\text{ct}}$ | $\Delta E_{\text{elstat}}$ | $\Delta E_{\text{pol}}$ | $\Delta E_{\text{disp}}$ |
|---------------------------------------------------------------------------|--------------------------|---------------------------|------------------------|----------------------------|-------------------------|--------------------------|
| 2.68                                                                      | 31.6                     | 151.0                     | -100.6                 | -20.2                      | -48.8                   | -28.6                    |
| 2.60                                                                      | 33.3                     | 161.2                     | -105.9                 | -22.1                      | -51.6                   | -29.6                    |
| 2.50                                                                      | 35.3                     | 175.9                     | -113.2                 | -24.7                      | -55.4                   | -31.0                    |
| 2.38                                                                      | 38.0                     | 198.0                     | -123.8                 | -28.9                      | -61.4                   | -33.1                    |
| 2.23                                                                      | 42.1                     | 235.0                     | -140.8                 | -36.5                      | -72.3                   | -36.5                    |
| 2.05(TS)                                                                  | 49.5                     | 297.4                     | -169.1                 | -51.5                      | -92.7                   | -41.7                    |
| 1.86                                                                      | 60.5                     | 395.9                     | -213.3                 | -81.0                      | -123.3                  | -49.1                    |
| 1.69                                                                      | 73.1                     | 528.2                     | -271.7                 | -134.2                     | -152.2                  | -58.1                    |
| 1.60                                                                      | 80.8                     | 623.4                     | -313.1                 | -182.3                     | -163.9                  | -64.3                    |
| 1.57                                                                      | 85.0                     | 665.7                     | -330.4                 | -208.7                     | -166.7                  | -67.4                    |

**Table S3. EDA energy terms of alkyne insertion with Cp<sup>E</sup> (TS2b) along IRC**

| Energy terms<br>(in kcal/mol)<br>$r(\text{C-C})$<br>in <b>TS2b</b> (in Å) | $\Delta E_{\text{dist}}$ | $\Delta E_{\text{Pauli}}$ | $\Delta E_{\text{ct}}$ | $\Delta E_{\text{elstat}}$ | $\Delta E_{\text{pol}}$ | $\Delta E_{\text{disp}}$ |
|---------------------------------------------------------------------------|--------------------------|---------------------------|------------------------|----------------------------|-------------------------|--------------------------|
| 2.69                                                                      | 32.9                     | 154.6                     | -102.7                 | -22.5                      | -52.6                   | -30.0                    |
| 2.61                                                                      | 34.8                     | 165.6                     | -108.6                 | -24.5                      | -55.7                   | -31.0                    |
| 2.51                                                                      | 37.1                     | 181.4                     | -116.7                 | -27.5                      | -60.1                   | -32.5                    |
| 2.38                                                                      | 40.2                     | 205.0                     | -128.1                 | -32.1                      | -66.8                   | -34.7                    |
| 2.22                                                                      | 45.0                     | 243.7                     | -145.8                 | -40.4                      | -78.5                   | -38.2                    |
| 2.04(TS)                                                                  | 52.9                     | 310.0                     | -175.6                 | -56.6                      | -100.6                  | -43.7                    |
| 1.84                                                                      | 64.6                     | 417.5                     | -223.7                 | -89.1                      | -133.7                  | -51.6                    |
| 1.67                                                                      | 77.6                     | 559.3                     | -286.0                 | -146.2                     | -164.1                  | -61.2                    |
| 1.59                                                                      | 85.2                     | 653.9                     | -326.7                 | -193.9                     | -175.9                  | -67.5                    |
| 1.56                                                                      | 89.7                     | 696.1                     | -343.5                 | -220.0                     | -179.1                  | -70.8                    |

**Table S4. EDA energy terms of alkyne insertion with Cp\* (TS5a) along IRC**

| Energy terms<br>(in kcal/mol)<br>$r(\text{C-C})$<br>in <b>TS5a</b> (in Å) | $\Delta E_{\text{dist}}$ | $\Delta E_{\text{Pauli}}$ | $\Delta E_{\text{elstat}}$ | $\Delta E_{\text{pol}}$ | $\Delta E_{\text{ct}}$ | $\Delta E_{\text{disp}}$ |
|---------------------------------------------------------------------------|--------------------------|---------------------------|----------------------------|-------------------------|------------------------|--------------------------|
| 2.62                                                                      | 41.0                     | 195.5                     | -122.5                     | -27.9                   | -63.8                  | -30.2                    |
| 2.54                                                                      | 42.7                     | 203.2                     | -125.6                     | -29.4                   | -65.1                  | -31.2                    |
| 2.44                                                                      | 44.1                     | 216.4                     | -131.2                     | -32.2                   | -67.7                  | -32.7                    |
| 2.32                                                                      | 46.6                     | 239.4                     | -141.2                     | -37.2                   | -73.1                  | -34.9                    |
| 2.17                                                                      | 51.1                     | 279.4                     | -158.9                     | -46.8                   | -84.4                  | -38.5                    |
| 2.00(TS)                                                                  | 60.5                     | 345.5                     | -188.0                     | -64.8                   | -104.8                 | -43.9                    |
| 1.82                                                                      | 70.1                     | 445.9                     | -231.7                     | -98.9                   | -133.1                 | -51.3                    |
| 1.68                                                                      | 82.0                     | 566.8                     | -283.4                     | -151.6                  | -157.4                 | -59.6                    |
| 1.61                                                                      | 89.1                     | 644.2                     | -315.3                     | -192.7                  | -167.2                 | -64.9                    |
| 1.58                                                                      | 93.4                     | 682.7                     | -329.8                     | -217.6                  | -170.6                 | -67.7                    |

**Table S5. EDA energy terms of alkyne insertion with Cp<sup>E</sup> (TS5b) along IRC**

| Energy terms<br>(in kcal/mol)<br>$r(\text{C-C})$<br>in <b>TS5b</b> (in Å) | $\Delta E_{\text{dist}}$ | $\Delta E_{\text{Pauli}}$ | $\Delta E_{\text{ct}}$ | $\Delta E_{\text{elstat}}$ | $\Delta E_{\text{pol}}$ | $\Delta E_{\text{disp}}$ |
|---------------------------------------------------------------------------|--------------------------|---------------------------|------------------------|----------------------------|-------------------------|--------------------------|
| 2.62                                                                      | 40.6                     | 192.7                     | -121.0                 | -29.1                      | -64.2                   | -31.3                    |
| 2.55                                                                      | 41.4                     | 200.1                     | -123.9                 | -30.7                      | -65.6                   | -32.3                    |
| 2.45                                                                      | 42.7                     | 212.4                     | -129.0                 | -33.3                      | -68.2                   | -33.7                    |
| 2.33                                                                      | 45.3                     | 234.0                     | -138.3                 | -38.1                      | -73.6                   | -35.8                    |
| 2.18                                                                      | 50.1                     | 271.9                     | -154.7                 | -47.0                      | -84.9                   | -39.2                    |
| 2.00(TS)                                                                  | 58.4                     | 335.8                     | -182.6                 | -64.1                      | -106.0                  | -44.3                    |
| 1.82                                                                      | 70.4                     | 434.7                     | -225.4                 | -96.9                      | -135.9                  | -51.4                    |
| 1.67                                                                      | 83.0                     | 552.1                     | -275.5                 | -146.9                     | -161.3                  | -59.3                    |
| 1.61                                                                      | 90.1                     | 623.2                     | -304.7                 | -184.4                     | -171.3                  | -64.1                    |
| 1.58                                                                      | 94.7                     | 658.7                     | -318.0                 | -207.2                     | -174.8                  | -66.8                    |

## Cartesian Coordinates (Å) and Energies of the Optimized Structures

1a

B3LYP SCF energy: -440.25674321 a.u.  
B3LYP enthalpy: -440.090764 a.u.  
B3LYP free energy: -440.137004 a.u.  
M06 SCF energy in solution: -440.13375371 a.u.  
M06 enthalpy in solution: -439.967774 a.u.  
M06 free energy in solution: -440.014014 a.u.  
Three lowest frequencies (cm<sup>-1</sup>): 17.6535 57.4933 91.1361

Cartesian coordinates

| ATOM | X         | Y         | Z         |
|------|-----------|-----------|-----------|
| C    | -1.244010 | -1.334491 | -0.000369 |
| C    | -0.304431 | -0.290548 | -0.000277 |
| C    | -0.750817 | 1.040339  | 0.000128  |
| C    | -2.121918 | 1.300168  | 0.000473  |
| C    | -3.057627 | 0.264642  | 0.000405  |
| C    | -2.608427 | -1.057521 | -0.000020 |
| H    | -0.901305 | -2.367922 | -0.000733 |
| H    | -0.027157 | 1.842865  | 0.000130  |
| H    | -2.457906 | 2.333842  | 0.000797  |
| H    | -4.121595 | 0.483242  | 0.000672  |
| H    | -3.319653 | -1.879186 | -0.000096 |
| N    | 1.061131  | -0.651170 | -0.000601 |
| H    | 1.235388  | -1.646432 | -0.000219 |
| C    | 2.174841  | 0.161572  | -0.000534 |
| O    | 2.134616  | 1.383469  | -0.000830 |
| C    | 3.501302  | -0.588654 | 0.001023  |
| H    | 4.070049  | -0.291847 | 0.887804  |
| H    | 3.404338  | -1.679107 | -0.007788 |
| H    | 4.079518  | -0.278047 | -0.874688 |

1b

B3LYP SCF energy: -425.39550544 a.u.  
B3LYP enthalpy: -425.195407 a.u.  
B3LYP free energy: -425.240491 a.u.  
M06 SCF energy in solution: -425.26158765 a.u.  
M06 enthalpy in solution: -425.061489 a.u.  
M06 free energy in solution: -425.106573 a.u.  
Three lowest frequencies (cm<sup>-1</sup>): 45.2649 132.1377 222.8367

Cartesian coordinates

| ATOM | X        | Y         | Z         |
|------|----------|-----------|-----------|
| C    | 0.773069 | -1.195866 | -0.000077 |
| C    | 0.073032 | 0.019981  | -0.000078 |
| C    | 0.806967 | 1.212145  | 0.000005  |
| C    | 2.203809 | 1.187934  | 0.000027  |
| C    | 2.890476 | -0.026170 | -0.000003 |
| C    | 2.167476 | -1.220978 | -0.000040 |

|   |           |           |           |
|---|-----------|-----------|-----------|
| H | 0.229200  | -2.137348 | -0.000082 |
| H | 0.276535  | 2.156608  | 0.000036  |
| H | 2.755151  | 2.124964  | 0.000068  |
| H | 3.977178  | -0.043448 | 0.000023  |
| H | 2.688413  | -2.175095 | -0.000040 |
| C | -1.457016 | 0.030889  | -0.000002 |
| O | -1.861677 | 1.407355  | 0.000338  |
| H | -2.831331 | 1.417960  | 0.000663  |
| C | -2.004937 | -0.647300 | -1.270193 |
| H | -1.695972 | -1.695250 | -1.340776 |
| H | -3.103132 | -0.623661 | -1.269919 |
| H | -1.646545 | -0.119310 | -2.158963 |
| C | -2.004739 | -0.647915 | 1.269953  |
| H | -1.646359 | -0.120270 | 2.158929  |
| H | -3.102943 | -0.624456 | 1.269769  |
| H | -1.695596 | -1.695850 | 1.340037  |

2

B3LYP SCF energy: -539.45079265 a.u.  
 B3LYP enthalpy: -539.246874 a.u.  
 B3LYP free energy: -539.297932 a.u.  
 M06 SCF energy in solution: -539.23212605 a.u.  
 M06 enthalpy in solution: -539.028207 a.u.  
 M06 free energy in solution: -539.079265 a.u.  
 Three lowest frequencies (cm-1): 27.8119 47.4369 52.8172

Cartesian coordinates

| ATOM | X         | Y         | Z         |
|------|-----------|-----------|-----------|
| C    | 0.608260  | 0.000005  | 0.000135  |
| C    | -0.608261 | 0.000049  | 0.000159  |
| C    | 2.033178  | 0.000005  | 0.000065  |
| C    | 2.750900  | 1.213630  | -0.000284 |
| C    | 2.750888  | -1.213628 | 0.000320  |
| C    | 4.143254  | 1.208755  | -0.000365 |
| H    | 2.203155  | 2.151007  | -0.000493 |
| C    | 4.143243  | -1.208769 | 0.000249  |
| H    | 2.203133  | -2.150999 | 0.000581  |
| C    | 4.844675  | -0.000010 | -0.000094 |
| H    | 4.683580  | 2.151619  | -0.000638 |
| H    | 4.683558  | -2.151638 | 0.000459  |
| H    | 5.931217  | -0.000016 | -0.000156 |
| C    | -2.033178 | 0.000026  | 0.000063  |
| C    | -2.750869 | -1.213617 | -0.000275 |
| C    | -2.750919 | 1.213640  | 0.000328  |
| C    | -4.143224 | -1.208780 | -0.000366 |
| H    | -2.203102 | -2.150982 | -0.000474 |
| C    | -4.143273 | 1.208743  | 0.000248  |
| H    | -2.203190 | 2.151027  | 0.000599  |
| C    | -4.844676 | -0.000033 | -0.000104 |



|   |           |           |           |
|---|-----------|-----------|-----------|
| H | -4.683522 | -2.151659 | -0.000638 |
| H | -4.683611 | 2.151599  | 0.000459  |
| H | -5.931217 | -0.000055 | -0.000166 |

3a

|                                               |                    |         |         |
|-----------------------------------------------|--------------------|---------|---------|
| B3LYP SCF energy:                             | -978.55921678 a.u. |         |         |
| B3LYP enthalpy:                               | -978.209187 a.u.   |         |         |
| B3LYP free energy:                            | -978.277706 a.u.   |         |         |
| M06 SCF energy in solution:                   | -978.21650706 a.u. |         |         |
| M06 enthalpy in solution:                     | -977.866477 a.u.   |         |         |
| M06 free energy in solution:                  | -977.934996 a.u.   |         |         |
| Three lowest frequencies (cm <sup>-1</sup> ): | 33.2966            | 42.9513 | 49.0753 |

Cartesian coordinates

| ATOM | X         | Y         | Z         |
|------|-----------|-----------|-----------|
| C    | -3.743922 | -0.033149 | -0.214514 |
| C    | -2.349369 | -0.038403 | -0.108444 |
| C    | -1.605059 | 1.161531  | -0.062989 |
| C    | -2.264469 | 2.396176  | -0.154192 |
| C    | -3.650410 | 2.408655  | -0.262193 |
| C    | -4.377690 | 1.206276  | -0.286198 |
| H    | -4.301476 | -0.957462 | -0.257399 |
| H    | -1.696924 | 3.321705  | -0.144779 |
| H    | -4.177005 | 3.356327  | -0.335308 |
| H    | -5.460040 | 1.237548  | -0.377043 |
| N    | -1.435467 | -1.112119 | 0.002615  |
| C    | -1.861939 | -2.432374 | 0.285899  |
| O    | -2.990171 | -2.782312 | -0.009813 |
| C    | -0.925563 | -3.373692 | 1.020265  |
| H    | -1.559747 | -4.112763 | 1.514194  |
| H    | -0.265301 | -3.897720 | 0.323480  |
| H    | -0.297018 | -2.864818 | 1.753698  |
| C    | -0.124726 | -0.564898 | 0.061625  |
| C    | -0.202888 | 0.808282  | 0.031967  |
| C    | 1.100689  | -1.388998 | -0.002691 |
| C    | 1.310166  | -2.283952 | -1.067005 |
| C    | 2.106329  | -1.247937 | 0.967100  |
| C    | 2.487092  | -3.027603 | -1.148596 |
| H    | 0.549364  | -2.385173 | -1.836771 |
| C    | 3.283994  | -1.990661 | 0.881939  |
| H    | 1.957684  | -0.553049 | 1.788023  |
| C    | 3.477053  | -2.885269 | -0.172641 |
| H    | 2.634464  | -3.712503 | -1.979383 |
| H    | 4.050420  | -1.871588 | 1.642966  |
| H    | 4.393987  | -3.464605 | -0.236977 |
| C    | 0.914506  | 1.777494  | 0.011717  |
| C    | 1.966331  | 1.672179  | -0.914108 |
| C    | 0.924685  | 2.856377  | 0.913454  |
| C    | 2.997803  | 2.610235  | -0.931385 |

|   |          |          |           |
|---|----------|----------|-----------|
| H | 1.967184 | 0.854486 | -1.628069 |
| C | 1.956601 | 3.795321 | 0.894253  |
| H | 0.123071 | 2.947504 | 1.641230  |
| C | 2.997796 | 3.675560 | -0.028025 |
| H | 3.800356 | 2.512174 | -1.657811 |
| H | 1.947464 | 4.619126 | 1.603271  |
| H | 3.801105 | 4.407244 | -0.044560 |

3b

B3LYP SCF energy: -963.70130948 a.u.  
 B3LYP enthalpy: -963.316486 a.u.  
 B3LYP free energy: -963.385325 a.u.  
 M06 SCF energy in solution: -963.34365866 a.u.  
 M06 enthalpy in solution: -962.958835 a.u.  
 M06 free energy in solution: -963.027674 a.u.  
 Three lowest frequencies (cm<sup>-1</sup>): 34.7298 38.3465 48.4180

Cartesian coordinates

| ATOM | X         | Y         | Z         |
|------|-----------|-----------|-----------|
| C    | -2.280286 | 1.855341  | -0.442351 |
| C    | -1.710664 | 0.603123  | -0.148878 |
| C    | -2.566458 | -0.515013 | -0.026714 |
| C    | -3.943560 | -0.357677 | -0.188206 |
| C    | -4.496023 | 0.894218  | -0.469553 |
| C    | -3.657369 | 2.001030  | -0.596722 |
| H    | -1.633832 | 2.718577  | -0.557705 |
| H    | -4.601906 | -1.215501 | -0.087808 |
| H    | -5.571112 | 0.999269  | -0.586703 |
| H    | -4.072464 | 2.980004  | -0.821617 |
| C    | -1.938904 | -1.848463 | 0.354407  |
| C    | 0.237747  | -0.853816 | -0.080102 |
| C    | -0.252713 | 0.416566  | -0.029743 |
| C    | 1.656096  | -1.289291 | -0.083979 |
| C    | 2.644632  | -0.651054 | 0.684248  |
| C    | 2.020886  | -2.417033 | -0.842196 |
| C    | 3.959769  | -1.113863 | 0.674874  |
| H    | 2.382345  | 0.200516  | 1.301003  |
| C    | 3.338371  | -2.870013 | -0.857098 |
| H    | 1.261260  | -2.933461 | -1.418809 |
| C    | 4.315257  | -2.219722 | -0.099785 |
| H    | 4.707261  | -0.610270 | 1.282220  |
| H    | 3.601458  | -3.736223 | -1.458714 |
| H    | 5.341887  | -2.576217 | -0.107033 |
| C    | 0.624644  | 1.624048  | 0.007660  |
| C    | 1.464357  | 1.942732  | -1.071326 |
| C    | 0.598865  | 2.493258  | 1.111578  |
| C    | 2.268952  | 3.082443  | -1.039956 |
| H    | 1.485669  | 1.285540  | -1.935797 |
| C    | 1.402482  | 3.633810  | 1.144334  |

|   |           |           |           |
|---|-----------|-----------|-----------|
| H | -0.055290 | 2.266735  | 1.949724  |
| C | 2.242606  | 3.930950  | 0.068700  |
| H | 2.914297  | 3.309171  | -1.884691 |
| H | 1.372888  | 4.289749  | 2.010663  |
| H | 2.868445  | 4.819131  | 0.093153  |
| O | -0.599998 | -1.930610 | -0.205336 |
| C | -1.829786 | -1.979865 | 1.884741  |
| H | -2.826656 | -1.955987 | 2.337574  |
| H | -1.341575 | -2.924133 | 2.149728  |
| H | -1.246051 | -1.154788 | 2.304044  |
| C | -2.652230 | -3.062331 | -0.245777 |
| H | -2.061673 | -3.961323 | -0.044356 |
| H | -3.642635 | -3.200748 | 0.197415  |
| H | -2.762369 | -2.951430 | -1.328543 |

4a

B3LYP SCF energy: -1168.21710038 a.u.  
 B3LYP enthalpy: -1167.753125 a.u.  
 B3LYP free energy: -1167.846322 a.u.  
 M06 SCF energy in solution: -1169.03579786 a.u.  
 M06 enthalpy in solution: -1168.571822 a.u.  
 M06 free energy in solution: -1168.665019 a.u.  
 Three lowest frequencies (cm-1): 15.1214 17.3344 28.4654

Cartesian coordinates

| ATOM | X         | Y         | Z         |
|------|-----------|-----------|-----------|
| C    | -3.174363 | -0.205989 | -0.595610 |
| C    | -2.338474 | -1.049301 | -1.425309 |
| C    | -1.604758 | -1.936628 | -0.566417 |
| C    | -2.034759 | -1.691066 | 0.802820  |
| C    | -3.009619 | -0.642199 | 0.780952  |
| Rh   | -1.116182 | 0.134621  | -0.035117 |
| O    | -0.320129 | 1.671604  | -1.343919 |
| O    | -0.966867 | 2.195690  | 0.675532  |
| C    | -0.443097 | 2.556723  | -0.434282 |
| C    | 0.040416  | 3.961703  | -0.648198 |
| H    | -0.453313 | 4.646703  | 0.044043  |
| H    | 1.121936  | 4.002668  | -0.471695 |
| H    | -0.139124 | 4.267645  | -1.681956 |
| C    | 5.115439  | -0.503098 | 0.831569  |
| C    | 3.842225  | -0.041579 | 0.477554  |
| C    | 3.488960  | 0.104299  | -0.869460 |
| C    | 4.421049  | -0.230375 | -1.852423 |
| C    | 5.690943  | -0.697359 | -1.507889 |
| C    | 6.036973  | -0.828677 | -0.161705 |
| H    | 5.383403  | -0.611959 | 1.880170  |
| H    | 2.511510  | 0.479298  | -1.143563 |
| H    | 4.150265  | -0.114380 | -2.897851 |
| H    | 6.407937  | -0.951801 | -2.282415 |

|   |           |           |           |
|---|-----------|-----------|-----------|
| H | 7.023086  | -1.185676 | 0.119275  |
| N | 2.960458  | 0.316371  | 1.544522  |
| H | 3.416547  | 0.563913  | 2.413564  |
| C | 1.614846  | 0.292762  | 1.568232  |
| O | 0.964129  | -0.101104 | 0.570137  |
| C | 0.942257  | 0.753462  | 2.837303  |
| H | 0.301590  | -0.051374 | 3.212511  |
| H | 1.648101  | 1.038165  | 3.621670  |
| H | 0.297848  | 1.605329  | 2.598863  |
| C | -0.620389 | -2.983484 | -0.985815 |
| H | -1.104178 | -3.968708 | -1.010657 |
| H | -0.216744 | -2.783821 | -1.980820 |
| H | 0.220300  | -3.040407 | -0.288917 |
| C | -1.575470 | -2.466667 | 1.998541  |
| H | -1.711269 | -1.906150 | 2.926833  |
| H | -2.156071 | -3.394593 | 2.085255  |
| H | -0.521820 | -2.746397 | 1.914118  |
| C | -4.151402 | 0.820786  | -1.079771 |
| H | -5.125480 | 0.352737  | -1.274540 |
| H | -4.302934 | 1.610208  | -0.339203 |
| H | -3.814743 | 1.287836  | -2.008679 |
| C | -3.736370 | -0.066063 | 1.954245  |
| H | -4.750173 | -0.485368 | 2.001905  |
| H | -3.236902 | -0.294983 | 2.898136  |
| H | -3.830395 | 1.020349  | 1.870969  |
| C | -2.233795 | -0.963734 | -2.914010 |
| H | -3.051474 | -1.536387 | -3.371926 |
| H | -2.313021 | 0.069052  | -3.262656 |
| H | -1.290632 | -1.375070 | -3.279786 |

4b

B3LYP SCF energy: -1623.95207821 a.u.  
 B3LYP enthalpy: -1623.392509 a.u.  
 B3LYP free energy: -1623.507103 a.u.  
 M06 SCF energy in solution: -1624.72025186 a.u.  
 M06 enthalpy in solution: -1624.160683 a.u.  
 M06 free energy in solution: -1624.275277 a.u.  
 Three lowest frequencies (cm<sup>-1</sup>): 7.5652 14.6138 15.1095

Cartesian coordinates

| ATOM | X         | Y        | Z         |
|------|-----------|----------|-----------|
| C    | 0.466719  | 1.393059 | 1.465382  |
| C    | 1.490333  | 0.500373 | 1.926965  |
| C    | 2.449543  | 0.333679 | 0.849685  |
| C    | 2.067518  | 1.201106 | -0.256300 |
| C    | 0.836035  | 1.826996 | 0.127582  |
| C    | -0.745802 | 1.832058 | 2.225209  |
| H    | -1.004759 | 1.117506 | 3.008911  |
| H    | -0.559769 | 2.806317 | 2.692213  |

|    |           |           |           |
|----|-----------|-----------|-----------|
| H  | -1.607302 | 1.941759  | 1.562720  |
| C  | 1.527464  | -0.189931 | 3.250936  |
| H  | 1.774965  | -1.247432 | 3.140832  |
| H  | 2.320660  | 0.254453  | 3.863725  |
| H  | 0.577916  | -0.090186 | 3.779642  |
| C  | 2.801215  | 1.409162  | -1.542181 |
| H  | 3.750627  | 1.918764  | -1.337241 |
| H  | 3.047755  | 0.452499  | -2.006689 |
| H  | 2.209280  | 2.010298  | -2.232081 |
| Rh | 0.538823  | -0.353291 | 0.099775  |
| C  | 3.692309  | -0.492063 | 0.988026  |
| O  | 4.063941  | -0.932448 | 2.055418  |
| O  | 4.324171  | -0.664334 | -0.176473 |
| C  | 5.559187  | -1.444566 | -0.125092 |
| H  | 6.246246  | -0.944923 | 0.563467  |
| H  | 5.320157  | -2.427882 | 0.289211  |
| C  | 6.106817  | -1.526253 | -1.535233 |
| H  | 7.033836  | -2.108821 | -1.530340 |
| H  | 5.396972  | -2.018961 | -2.207238 |
| H  | 6.332486  | -0.531069 | -1.930957 |
| C  | 0.097791  | 2.823609  | -0.713834 |
| O  | -0.060465 | 2.717816  | -1.914799 |
| O  | -0.325804 | 3.846763  | 0.027875  |
| C  | -1.024159 | 4.921764  | -0.679838 |
| H  | -1.908590 | 4.490605  | -1.157611 |
| H  | -0.360009 | 5.292426  | -1.465067 |
| C  | -1.372442 | 5.986890  | 0.338986  |
| H  | -0.471765 | 6.390194  | 0.811612  |
| H  | -1.892944 | 6.809396  | -0.162314 |
| H  | -2.031002 | 5.590783  | 1.118184  |
| C  | -3.959847 | -1.668221 | 0.713155  |
| C  | -4.360538 | -1.107879 | -0.506211 |
| C  | -5.717091 | -0.874811 | -0.765985 |
| C  | -6.674597 | -1.192970 | 0.194311  |
| C  | -6.284160 | -1.742801 | 1.416953  |
| C  | -4.931086 | -1.978064 | 1.666341  |
| H  | -2.915047 | -1.866643 | 0.909432  |
| H  | -6.023113 | -0.442172 | -1.716117 |
| H  | -7.724007 | -1.009687 | -0.015350 |
| H  | -7.029238 | -1.990743 | 2.166621  |
| H  | -4.621340 | -2.416389 | 2.610597  |
| N  | -3.444448 | -0.791368 | -1.555746 |
| C  | -2.128945 | -0.520283 | -1.495391 |
| O  | -1.537495 | -0.517548 | -0.381415 |
| C  | -1.425589 | -0.226962 | -2.792635 |
| H  | -2.101730 | -0.233430 | -3.651397 |
| H  | -0.938321 | 0.751336  | -2.723010 |
| H  | -0.640892 | -0.974982 | -2.941953 |
| C  | 0.586120  | -4.250316 | -0.919445 |
| H  | -0.455013 | -4.553229 | -1.082433 |
| H  | 1.151567  | -4.426047 | -1.836668 |

|   |           |           |           |
|---|-----------|-----------|-----------|
| H | 0.984440  | -4.856062 | -0.101408 |
| C | 0.625350  | -2.798188 | -0.548885 |
| O | 0.362158  | -2.412800 | 0.640663  |
| O | 0.895053  | -1.890853 | -1.406254 |
| H | -3.863326 | -0.715099 | -2.474052 |

5a

B3LYP SCF energy: -939.10142232 a.u.  
 B3LYP enthalpy: -938.706851 a.u.  
 B3LYP free energy: -938.783780 a.u.  
 M06 SCF energy in solution: -939.94637093 a.u.  
 M06 enthalpy in solution: -939.551800 a.u.  
 M06 free energy in solution: -939.628729 a.u.  
 Three lowest frequencies (cm-1): 21.8155 26.3284 68.2046

Cartesian coordinates

| ATOM | X         | Y         | Z         |
|------|-----------|-----------|-----------|
| C    | 1.628959  | -1.464663 | 0.654568  |
| C    | 1.850109  | -1.301115 | -0.739640 |
| C    | 2.422064  | 0.045313  | -0.957753 |
| C    | 2.523128  | 0.697308  | 0.285574  |
| C    | 1.950083  | -0.188560 | 1.284285  |
| C    | 1.277497  | -2.719219 | 1.395981  |
| H    | 0.966607  | -3.519328 | 0.720863  |
| H    | 2.158408  | -3.080010 | 1.942537  |
| H    | 0.477640  | -2.556902 | 2.123907  |
| C    | 1.720618  | -2.342299 | -1.807594 |
| H    | 1.363949  | -1.913845 | -2.748387 |
| H    | 2.700414  | -2.798677 | -2.004060 |
| H    | 1.034118  | -3.141128 | -1.518952 |
| C    | 3.032026  | 2.081092  | 0.556169  |
| H    | 4.032556  | 2.042648  | 1.005329  |
| H    | 3.101717  | 2.673120  | -0.359180 |
| H    | 2.379275  | 2.618491  | 1.251097  |
| Rh   | 0.302173  | 0.137708  | -0.095339 |
| C    | -4.024437 | -0.405386 | -0.013885 |
| C    | -2.736573 | 0.162824  | -0.019578 |
| C    | -1.568616 | -0.637961 | -0.037771 |
| C    | -1.785185 | -2.034653 | -0.062361 |
| C    | -3.051540 | -2.605721 | -0.068661 |
| C    | -4.183355 | -1.781475 | -0.038202 |
| H    | -4.900845 | 0.239906  | 0.004558  |
| H    | -0.928223 | -2.696928 | -0.086044 |
| H    | -3.163375 | -3.685599 | -0.096464 |
| H    | -5.180511 | -2.210523 | -0.036620 |
| N    | -2.722393 | 1.580079  | -0.006989 |
| H    | -3.637754 | 2.010725  | 0.047547  |
| C    | -1.688824 | 2.426920  | -0.088320 |
| O    | -0.490747 | 2.050119  | -0.171804 |

|   |           |           |           |
|---|-----------|-----------|-----------|
| C | -1.981061 | 3.904802  | -0.085030 |
| H | -1.598235 | 4.346240  | -1.010828 |
| H | -3.046546 | 4.131507  | 0.002508  |
| H | -1.447111 | 4.374089  | 0.747185  |
| C | 2.827363  | 0.571461  | -2.297706 |
| H | 3.780282  | 0.119830  | -2.605542 |
| H | 2.088822  | 0.322283  | -3.066159 |
| H | 2.958970  | 1.655494  | -2.288530 |
| C | 1.885604  | 0.084597  | 2.751910  |
| H | 1.088537  | -0.485715 | 3.235447  |
| H | 2.836076  | -0.210046 | 3.219908  |
| H | 1.733019  | 1.146437  | 2.961588  |

5b

B3LYP SCF energy: -1394.84037011 a.u.  
 B3LYP enthalpy: -1394.350077 a.u.  
 B3LYP free energy: -1394.448226 a.u.  
 M06 SCF energy in solution: -1395.63637780 a.u.  
 M06 enthalpy in solution: -1395.146085 a.u.  
 M06 free energy in solution: -1395.244234 a.u.  
 Three lowest frequencies (cm<sup>-1</sup>): 14.2700 19.0464 25.7955

Cartesian coordinates

| ATOM | X         | Y         | Z         |
|------|-----------|-----------|-----------|
| C    | -1.456180 | -0.651056 | -1.425431 |
| C    | -0.085968 | -1.125462 | -1.677721 |
| C    | 0.418636  | -1.652471 | -0.450625 |
| C    | -0.585168 | -1.423542 | 0.587124  |
| C    | -1.762954 | -0.885083 | -0.064913 |
| C    | -2.328688 | -0.052796 | -2.480976 |
| H    | -1.735683 | 0.484947  | -3.225039 |
| H    | -2.868176 | -0.855236 | -3.002399 |
| H    | -3.075836 | 0.617235  | -2.056613 |
| C    | 0.532557  | -1.185274 | -3.039624 |
| H    | 1.587687  | -1.445786 | -2.984531 |
| H    | 0.017430  | -1.952459 | -3.634190 |
| H    | 0.419762  | -0.234889 | -3.569891 |
| C    | -0.482683 | -1.799616 | 2.029036  |
| H    | -0.721821 | -2.866422 | 2.135680  |
| H    | 0.534798  | -1.664477 | 2.398491  |
| H    | -1.188672 | -1.222247 | 2.624500  |
| Rh   | 0.086500  | 0.522749  | -0.192865 |
| C    | 1.691326  | -2.428375 | -0.328257 |
| O    | 2.583308  | -2.393328 | -1.155761 |
| O    | 1.708723  | -3.193621 | 0.764987  |
| C    | 2.895772  | -4.027421 | 0.951004  |
| H    | 3.000730  | -4.664701 | 0.068887  |
| H    | 3.766875  | -3.367980 | 0.998966  |
| C    | 2.699105  | -4.825143 | 2.223691  |

|   |           |           |           |
|---|-----------|-----------|-----------|
| H | 3.573075  | -5.463902 | 2.387801  |
| H | 2.589854  | -4.167793 | 3.091959  |
| H | 1.815598  | -5.467343 | 2.155415  |
| C | -3.016314 | -0.507936 | 0.658489  |
| O | -3.057129 | -0.207886 | 1.834391  |
| O | -4.083752 | -0.574290 | -0.148084 |
| C | -5.372456 | -0.261972 | 0.464728  |
| H | -5.332122 | 0.765718  | 0.837348  |
| H | -5.508426 | -0.926829 | 1.321930  |
| C | -6.440307 | -0.455011 | -0.592848 |
| H | -6.450128 | -1.486034 | -0.959489 |
| H | -7.422197 | -0.236745 | -0.160355 |
| H | -6.285335 | 0.217556  | -1.442490 |
| C | 3.362209  | 3.346198  | 0.234116  |
| C | 2.093802  | 2.739095  | 0.281871  |
| C | 1.884636  | 1.427737  | -0.215351 |
| C | 3.011831  | 0.779192  | -0.767919 |
| C | 4.263050  | 1.379995  | -0.826036 |
| C | 4.440766  | 2.672705  | -0.316551 |
| H | 3.494211  | 4.352990  | 0.625716  |
| H | 2.909668  | -0.225588 | -1.160148 |
| H | 5.100504  | 0.844633  | -1.263208 |
| H | 5.414410  | 3.151742  | -0.351193 |
| N | 1.078942  | 3.541066  | 0.855254  |
| H | 1.393809  | 4.435067  | 1.213303  |
| C | -0.233800 | 3.301549  | 0.955284  |
| O | -0.768955 | 2.238464  | 0.545625  |
| C | -1.109246 | 4.352008  | 1.583871  |
| H | -1.640101 | 3.910391  | 2.433028  |
| H | -0.550000 | 5.226577  | 1.925410  |
| H | -1.862122 | 4.671736  | 0.856216  |

6a

B3LYP SCF energy: -1478.56131790 a.u.  
 B3LYP enthalpy: -1477.960877 a.u.  
 B3LYP free energy: -1478.067285 a.u.  
 M06 SCF energy in solution: -1479.18778979 a.u.  
 M06 enthalpy in solution: -1478.587349 a.u.  
 M06 free energy in solution: -1478.693757 a.u.  
 Three lowest frequencies (cm<sup>-1</sup>): 14.3318 19.8336 28.6508

Cartesian coordinates

| ATOM | X         | Y         | Z         |
|------|-----------|-----------|-----------|
| C    | -0.857073 | -2.662402 | -0.975458 |
| C    | -1.261885 | -1.584257 | -1.829639 |
| C    | -0.084643 | -1.152149 | -2.604588 |
| C    | 1.025532  | -1.869676 | -2.147817 |
| C    | 0.568213  | -2.759844 | -1.068323 |
| C    | -1.748795 | -3.581169 | -0.198026 |



|    |           |           |           |
|----|-----------|-----------|-----------|
| H  | -2.704325 | -3.117411 | 0.053204  |
| H  | -1.964754 | -4.472567 | -0.802238 |
| H  | -1.282922 | -3.914285 | 0.732543  |
| C  | -2.674187 | -1.210221 | -2.162032 |
| H  | -2.777469 | -0.146228 | -2.385947 |
| H  | -3.009295 | -1.769348 | -3.046778 |
| H  | -3.362620 | -1.447850 | -1.347032 |
| C  | 2.446341  | -1.797287 | -2.617211 |
| H  | 3.122069  | -1.542474 | -1.792916 |
| H  | 2.767540  | -2.766500 | -3.018789 |
| H  | 2.576900  | -1.054071 | -3.407398 |
| Rh | 0.148210  | -0.733856 | -0.276089 |
| C  | -0.454709 | -0.732415 | 4.060490  |
| C  | 0.133511  | -0.657661 | 2.786379  |
| C  | -0.638796 | -0.773301 | 1.615336  |
| C  | -2.019288 | -0.948018 | 1.796037  |
| C  | -2.614367 | -1.025945 | 3.057472  |
| C  | -1.824217 | -0.919949 | 4.201543  |
| H  | 0.172114  | -0.647089 | 4.946821  |
| H  | -2.660343 | -1.000934 | 0.922486  |
| H  | -3.689149 | -1.161113 | 3.141157  |
| H  | -2.264584 | -0.978628 | 5.191964  |
| N  | 1.545330  | -0.457169 | 2.798640  |
| H  | 1.942039  | -0.332003 | 3.721194  |
| C  | 2.425615  | -0.482580 | 1.789290  |
| O  | 2.107771  | -0.633931 | 0.586695  |
| C  | 3.884686  | -0.300707 | 2.128886  |
| H  | 4.236965  | 0.630452  | 1.673098  |
| H  | 4.075186  | -0.267245 | 3.204779  |
| H  | 4.459262  | -1.121925 | 1.690501  |
| C  | -0.814586 | 1.615297  | -0.319498 |
| C  | 0.424458  | 1.580460  | -0.385678 |
| C  | -2.196257 | 1.985858  | -0.343312 |
| C  | -2.948831 | 2.064063  | 0.846372  |
| C  | -2.791914 | 2.382235  | -1.561034 |
| C  | -4.266908 | 2.512377  | 0.810052  |
| H  | -2.490694 | 1.780212  | 1.786175  |
| C  | -4.109555 | 2.829933  | -1.585072 |
| H  | -2.204456 | 2.363264  | -2.474005 |
| C  | -4.851194 | 2.891451  | -0.401514 |
| H  | -4.837459 | 2.574743  | 1.731984  |
| H  | -4.555504 | 3.140952  | -2.525107 |
| H  | -5.878062 | 3.244334  | -0.422635 |
| C  | 1.742041  | 2.176584  | -0.339727 |
| C  | 2.037717  | 3.089827  | 0.690946  |
| C  | 2.720002  | 1.895557  | -1.308312 |
| C  | 3.285304  | 3.709738  | 0.741362  |
| H  | 1.281091  | 3.314933  | 1.436396  |
| C  | 3.961953  | 2.524466  | -1.256039 |
| H  | 2.497472  | 1.188103  | -2.099509 |
| C  | 4.249959  | 3.430087  | -0.230729 |

|   |           |           |           |
|---|-----------|-----------|-----------|
| H | 3.499965  | 4.420437  | 1.534304  |
| H | 4.706651  | 2.309325  | -2.016905 |
| H | 5.218570  | 3.919951  | -0.193414 |
| C | 1.437377  | -3.771516 | -0.386455 |
| H | 0.991507  | -4.124891 | 0.546729  |
| H | 1.584426  | -4.643987 | -1.037612 |
| H | 2.424336  | -3.357908 | -0.161638 |
| C | -0.140515 | -0.140954 | -3.708313 |
| H | -0.722169 | -0.531870 | -4.553213 |
| H | -0.625231 | 0.784087  | -3.380105 |
| H | 0.854071  | 0.115363  | -4.080459 |

6b

B3LYP SCF energy: -1934.30369730 a.u.  
 B3LYP enthalpy: -1933.607261 a.u.  
 B3LYP free energy: -1933.733690 a.u.  
 M06 SCF energy in solution: -1934.87931632 a.u.  
 M06 enthalpy in solution: -1934.182880 a.u.  
 M06 free energy in solution: -1934.309309 a.u.  
 Three lowest frequencies (cm<sup>-1</sup>): 13.6295 17.2588 20.5554

Cartesian coordinates

| ATOM | X         | Y         | Z         |
|------|-----------|-----------|-----------|
| C    | -1.460454 | 0.101784  | -1.991758 |
| C    | -0.078064 | 0.187931  | -2.337033 |
| C    | 0.562126  | -1.091308 | -1.984661 |
| C    | -0.401895 | -1.922510 | -1.376535 |
| C    | -1.643546 | -1.137085 | -1.290298 |
| C    | -2.511135 | 1.093393  | -2.386001 |
| H    | -2.071248 | 2.063260  | -2.626929 |
| H    | -3.028898 | 0.727299  | -3.281298 |
| H    | -3.262316 | 1.228688  | -1.607689 |
| C    | 0.485116  | 1.264992  | -3.215575 |
| H    | 1.564614  | 1.182027  | -3.302659 |
| H    | 0.049157  | 1.166703  | -4.219316 |
| H    | 0.234118  | 2.263690  | -2.847501 |
| C    | -0.253529 | -3.313622 | -0.842353 |
| H    | -0.003873 | -3.282018 | 0.225080  |
| H    | -1.197046 | -3.856118 | -0.929388 |
| H    | 0.535928  | -3.846522 | -1.368499 |
| Rh   | -0.242375 | 0.018851  | -0.023924 |
| C    | 2.009974  | -1.352640 | -2.218683 |
| O    | 2.811294  | -0.488043 | -2.525575 |
| O    | 2.348372  | -2.642873 | -2.056438 |
| C    | 3.748240  | -2.971934 | -2.299312 |
| H    | 4.011198  | -2.625227 | -3.302214 |
| H    | 4.358893  | -2.418481 | -1.579868 |
| C    | 3.897433  | -4.473002 | -2.151063 |
| H    | 4.939730  | -4.754533 | -2.333680 |

|   |           |           |           |
|---|-----------|-----------|-----------|
| H | 3.627324  | -4.802710 | -1.142539 |
| H | 3.269104  | -5.004822 | -2.872373 |
| C | -2.915517 | -1.684746 | -0.730015 |
| O | -2.961874 | -2.460878 | 0.207227  |
| O | -3.989755 | -1.237479 | -1.391417 |
| C | -5.284251 | -1.720767 | -0.925194 |
| H | -5.415720 | -1.395366 | 0.111289  |
| H | -5.263734 | -2.813911 | -0.936134 |
| C | -6.344052 | -1.152839 | -1.847690 |
| H | -6.183659 | -1.480178 | -2.879524 |
| H | -7.330755 | -1.503174 | -1.527334 |
| H | -6.345656 | -0.058566 | -1.823990 |
| C | -2.954090 | 1.987635  | 2.766399  |
| C | -2.104904 | 1.048628  | 2.157033  |
| C | -1.429246 | 1.352253  | 0.962011  |
| C | -1.645202 | 2.624364  | 0.415803  |
| C | -2.490090 | 3.562604  | 1.014659  |
| C | -3.149381 | 3.241654  | 2.200787  |
| H | -3.462404 | 1.726949  | 3.693176  |
| H | -1.137095 | 2.901003  | -0.502085 |
| H | -2.627773 | 4.536707  | 0.553764  |
| H | -3.808352 | 3.956781  | 2.683097  |
| N | -2.015300 | -0.204489 | 2.825554  |
| H | -2.656531 | -0.320591 | 3.599779  |
| C | -1.216660 | -1.246922 | 2.569082  |
| O | -0.356644 | -1.258432 | 1.655479  |
| C | -1.369535 | -2.480310 | 3.418828  |
| H | -0.378180 | -2.854197 | 3.686448  |
| H | -1.948965 | -2.302950 | 4.328805  |
| H | -1.873145 | -3.244642 | 2.816631  |
| C | 1.632909  | 1.648448  | 0.358725  |
| C | 1.742281  | 0.582725  | 0.988643  |
| C | 1.881874  | 2.892799  | -0.297892 |
| C | 1.348274  | 4.100664  | 0.199266  |
| C | 2.775679  | 2.924144  | -1.391492 |
| C | 1.692967  | 5.310010  | -0.398008 |
| H | 0.680826  | 4.078338  | 1.053450  |
| C | 3.115468  | 4.141247  | -1.974787 |
| H | 3.197697  | 1.993479  | -1.756495 |
| C | 2.572922  | 5.333046  | -1.484387 |
| H | 1.284719  | 6.237980  | -0.008714 |
| H | 3.809548  | 4.161373  | -2.809739 |
| H | 2.842920  | 6.280158  | -1.942441 |
| C | 2.361751  | -0.283669 | 1.966648  |
| C | 2.646587  | 0.230937  | 3.245413  |
| C | 2.724169  | -1.606495 | 1.658369  |
| C | 3.291360  | -0.563836 | 4.191103  |
| H | 2.369346  | 1.253448  | 3.482412  |
| C | 3.371875  | -2.392264 | 2.608472  |
| H | 2.497797  | -2.010487 | 0.676898  |
| C | 3.655715  | -1.875409 | 3.875899  |

|   |          |           |          |
|---|----------|-----------|----------|
| H | 3.514927 | -0.156056 | 5.172604 |
| H | 3.657598 | -3.410536 | 2.360488 |
| H | 4.161720 | -2.491434 | 4.613554 |

7a

B3LYP SCF energy: -1478.59172468 a.u.  
 B3LYP enthalpy: -1477.990596 a.u.  
 B3LYP free energy: -1478.094365 a.u.  
 M06 SCF energy in solution: -1479.22135962 a.u.  
 M06 enthalpy in solution: -1478.620231 a.u.  
 M06 free energy in solution: -1478.724000 a.u.  
 Three lowest frequencies (cm-1): 14.8178 24.1458 36.8811

Cartesian coordinates

| ATOM | X         | Y         | Z         |
|------|-----------|-----------|-----------|
| C    | 2.593545  | 0.373648  | -1.570786 |
| C    | 2.291134  | 1.629862  | -0.954557 |
| C    | 2.688758  | 1.513681  | 0.428683  |
| C    | 3.447793  | 0.256688  | 0.588782  |
| C    | 3.387306  | -0.434725 | -0.620789 |
| C    | 2.429885  | 0.046438  | -3.024110 |
| H    | 1.573007  | 0.565267  | -3.461436 |
| H    | 3.325188  | 0.359054  | -3.579216 |
| H    | 2.303862  | -1.027091 | -3.185725 |
| C    | 1.744530  | 2.849818  | -1.626652 |
| H    | 1.163935  | 3.470082  | -0.941028 |
| H    | 2.575707  | 3.457540  | -2.009543 |
| H    | 1.100805  | 2.595131  | -2.471851 |
| C    | 4.100699  | -0.161491 | 1.870518  |
| H    | 3.386354  | -0.138964 | 2.700610  |
| H    | 4.513070  | -1.171076 | 1.806987  |
| H    | 4.921339  | 0.520899  | 2.125695  |
| Rh   | 1.161768  | 0.028739  | 0.066083  |
| C    | 0.281317  | -3.825588 | 0.404482  |
| C    | -0.356088 | -2.597911 | 0.604018  |
| C    | -0.635461 | -1.730398 | -0.479255 |
| C    | -0.201456 | -2.137303 | -1.761170 |
| C    | 0.421273  | -3.367794 | -1.966091 |
| C    | 0.652778  | -4.218607 | -0.881367 |
| H    | 0.484604  | -4.467282 | 1.257182  |
| H    | -0.417158 | -1.485689 | -2.602391 |
| H    | 0.708306  | -3.671116 | -2.968648 |
| H    | 1.129649  | -5.182387 | -1.032327 |
| N    | -0.759403 | -2.244954 | 1.928388  |
| H    | -1.350282 | -2.901616 | 2.422742  |
| C    | -0.303477 | -1.175785 | 2.621837  |
| O    | 0.507082  | -0.351935 | 2.154238  |
| C    | -0.825803 | -1.000034 | 4.026601  |
| H    | -1.551912 | -0.179359 | 4.031813  |

|   |           |           |           |
|---|-----------|-----------|-----------|
| H | -1.311712 | -1.897078 | 4.419654  |
| H | 0.000391  | -0.716769 | 4.683119  |
| C | -0.777068 | 0.638557  | -0.197730 |
| C | -1.496709 | -0.493511 | -0.333215 |
| C | -1.225394 | 2.035250  | -0.188822 |
| C | -1.835650 | 2.593489  | -1.329000 |
| C | -1.036785 | 2.856742  | 0.940252  |
| C | -2.244717 | 3.926680  | -1.337328 |
| H | -1.995424 | 1.968867  | -2.203326 |
| C | -1.455354 | 4.187604  | 0.931151  |
| H | -0.575690 | 2.436429  | 1.829924  |
| C | -2.055987 | 4.729022  | -0.209228 |
| H | -2.715698 | 4.338801  | -2.225428 |
| H | -1.316445 | 4.802590  | 1.816281  |
| H | -2.377677 | 5.766308  | -0.216564 |
| C | -2.973107 | -0.678403 | -0.354048 |
| C | -3.547366 | -1.783458 | -1.009521 |
| C | -3.833918 | 0.219180  | 0.307449  |
| C | -4.928955 | -1.975812 | -1.019135 |
| H | -2.913393 | -2.495378 | -1.530014 |
| C | -5.212819 | 0.023549  | 0.298140  |
| H | -3.420036 | 1.069748  | 0.837242  |
| C | -5.768893 | -1.072598 | -0.366984 |
| H | -5.347573 | -2.832148 | -1.540561 |
| H | -5.856150 | 0.728388  | 0.817625  |
| H | -6.844742 | -1.221278 | -0.373720 |
| C | 2.615180  | 2.589302  | 1.465879  |
| H | 3.549165  | 3.168644  | 1.470699  |
| H | 1.791868  | 3.279787  | 1.270889  |
| H | 2.482290  | 2.167282  | 2.466091  |
| C | 3.982883  | -1.768492 | -0.953179 |
| H | 4.757210  | -1.660593 | -1.723714 |
| H | 4.444995  | -2.235719 | -0.080512 |
| H | 3.229323  | -2.459984 | -1.345862 |

7b

B3LYP SCF energy: -1934.32700557 a.u.  
 B3LYP enthalpy: -1933.630189 a.u.  
 B3LYP free energy: -1933.755313 a.u.  
 M06 SCF energy in solution: -1934.91476744 a.u.  
 M06 enthalpy in solution: -1934.217951 a.u.  
 M06 free energy in solution: -1934.343075 a.u.  
 Three lowest frequencies (cm<sup>-1</sup>): 9.0129 20.4373 20.7386

Cartesian coordinates

| ATOM | X        | Y        | Z         |
|------|----------|----------|-----------|
| C    | 2.109697 | 0.456233 | -1.567471 |
| C    | 1.138203 | 1.502769 | -1.717291 |
| C    | 1.087833 | 2.198829 | -0.458629 |

|    |           |           |           |
|----|-----------|-----------|-----------|
| C  | 2.152040  | 1.673850  | 0.422507  |
| C  | 2.774322  | 0.620243  | -0.270312 |
| C  | 2.530563  | -0.483610 | -2.654784 |
| H  | 1.722297  | -0.661469 | -3.368029 |
| H  | 3.373633  | -0.042015 | -3.201255 |
| H  | 2.874890  | -1.436484 | -2.253698 |
| C  | 0.377207  | 1.838841  | -2.961794 |
| H  | -0.643219 | 2.151368  | -2.739194 |
| H  | 0.866717  | 2.678723  | -3.469131 |
| H  | 0.348544  | 0.991358  | -3.650832 |
| C  | 2.493536  | 2.197057  | 1.780878  |
| H  | 1.621974  | 2.145751  | 2.438987  |
| H  | 3.309367  | 1.624300  | 2.219382  |
| H  | 2.775175  | 3.254046  | 1.709601  |
| Rh | 0.470354  | 0.146896  | -0.051595 |
| C  | 0.299499  | 3.452281  | -0.255538 |
| O  | -0.099344 | 4.129626  | -1.179866 |
| O  | 0.117062  | 3.750678  | 1.039417  |
| C  | -0.576535 | 5.003901  | 1.306510  |
| H  | -0.007713 | 5.815317  | 0.843108  |
| H  | -1.555478 | 4.962439  | 0.820770  |
| C  | -0.681127 | 5.158894  | 2.810533  |
| H  | -1.198168 | 6.094926  | 3.046038  |
| H  | -1.247739 | 4.333707  | 3.254163  |
| H  | 0.309596  | 5.190700  | 3.274672  |
| C  | 3.884175  | -0.206540 | 0.282039  |
| O  | 4.053130  | -0.428729 | 1.465724  |
| O  | 4.699060  | -0.652267 | -0.689538 |
| C  | 5.851448  | -1.428137 | -0.252222 |
| H  | 5.488557  | -2.317793 | 0.271725  |
| H  | 6.416456  | -0.825819 | 0.464402  |
| C  | 6.665633  | -1.773238 | -1.483431 |
| H  | 7.007269  | -0.868185 | -1.994974 |
| H  | 7.546851  | -2.352062 | -1.187831 |
| H  | 6.083762  | -2.373991 | -2.189952 |
| C  | 1.198709  | -3.350290 | 1.602776  |
| C  | 0.107286  | -2.510298 | 1.385367  |
| C  | -0.326008 | -2.190759 | 0.071244  |
| C  | 0.434398  | -2.709627 | -1.002848 |
| C  | 1.520548  | -3.559097 | -0.787519 |
| C  | 1.889348  | -3.892491 | 0.516731  |
| H  | 1.516052  | -3.567235 | 2.618556  |
| H  | 0.109937  | -2.478168 | -2.012562 |
| H  | 2.060986  | -3.974439 | -1.632594 |
| H  | 2.727776  | -4.558804 | 0.695676  |
| N  | -0.587835 | -1.981894 | 2.511035  |
| H  | -0.856488 | -2.632813 | 3.238169  |
| C  | -0.738927 | -0.661200 | 2.772467  |
| O  | -0.323153 | 0.236730  | 2.015225  |
| C  | -1.452939 | -0.293368 | 4.049167  |
| H  | -2.439759 | 0.109942  | 3.796752  |

|   |           |           |           |
|---|-----------|-----------|-----------|
| H | -1.584475 | -1.140750 | 4.727052  |
| H | -0.891505 | 0.494682  | 4.557255  |
| C | -1.489988 | -0.203724 | -0.515241 |
| C | -1.648853 | -1.507330 | -0.220239 |
| C | -2.439954 | 0.799771  | -0.996589 |
| C | -3.059710 | 0.644437  | -2.252760 |
| C | -2.753212 | 1.935459  | -0.224755 |
| C | -3.973312 | 1.590745  | -2.714244 |
| H | -2.827487 | -0.229072 | -2.855140 |
| C | -3.675505 | 2.872801  | -0.687300 |
| H | -2.272941 | 2.066635  | 0.741034  |
| C | -4.286366 | 2.705992  | -1.933107 |
| H | -4.443906 | 1.455598  | -3.683956 |
| H | -3.920077 | 3.736833  | -0.075479 |
| H | -4.999734 | 3.441272  | -2.293361 |
| C | -2.885932 | -2.327088 | -0.155706 |
| C | -2.824639 | -3.723992 | -0.313022 |
| C | -4.141765 | -1.740174 | 0.094251  |
| C | -3.977198 | -4.505883 | -0.236690 |
| H | -1.872005 | -4.206601 | -0.512344 |
| C | -5.290296 | -2.523896 | 0.170740  |
| H | -4.215952 | -0.667975 | 0.237027  |
| C | -5.215551 | -3.909668 | 0.003665  |
| H | -3.905859 | -5.581692 | -0.370289 |
| H | -6.248349 | -2.050527 | 0.366797  |
| H | -6.113887 | -4.517242 | 0.061993  |

8a

B3LYP SCF energy: -1478.15749825 a.u.  
 B3LYP enthalpy: -1477.570413 a.u.  
 B3LYP free energy: -1477.674980 a.u.  
 M06 SCF energy in solution: -1478.75813023 a.u.  
 M06 enthalpy in solution: -1478.171045 a.u.  
 M06 free energy in solution: -1478.275612 a.u.  
 Three lowest frequencies (cm<sup>-1</sup>): 9.7011 19.2667 27.8598

Cartesian coordinates

| ATOM | X        | Y         | Z         |
|------|----------|-----------|-----------|
| C    | 3.354161 | 0.131399  | -0.791070 |
| C    | 3.437000 | -1.131925 | -0.206106 |
| C    | 2.399763 | -1.998604 | -0.801456 |
| C    | 1.735624 | -1.267211 | -1.805351 |
| C    | 2.214722 | 0.111120  | -1.720509 |
| C    | 4.208518 | 1.336326  | -0.528785 |
| H    | 4.804754 | 1.222616  | 0.380715  |
| H    | 4.903252 | 1.511285  | -1.361596 |
| H    | 3.599721 | 2.238961  | -0.415513 |
| C    | 4.412160 | -1.600343 | 0.831639  |
| H    | 3.909085 | -2.132619 | 1.646827  |

|    |           |           |           |
|----|-----------|-----------|-----------|
| H  | 5.137355  | -2.299538 | 0.392910  |
| H  | 4.973375  | -0.770675 | 1.268375  |
| C  | 0.752145  | -1.784354 | -2.810544 |
| H  | 1.268796  | -2.056377 | -3.741429 |
| H  | 0.232392  | -2.672231 | -2.443560 |
| H  | -0.002039 | -1.031526 | -3.056356 |
| Rh | 1.195025  | -0.217878 | 0.119250  |
| C  | 0.351575  | 3.843983  | 0.117058  |
| C  | -0.008260 | 2.492155  | 0.296840  |
| C  | -1.226300 | 2.025386  | -0.275070 |
| C  | -2.031674 | 2.937799  | -0.983566 |
| C  | -1.656323 | 4.263920  | -1.162814 |
| C  | -0.455410 | 4.714131  | -0.608015 |
| H  | 1.261931  | 4.204133  | 0.576276  |
| H  | -2.969729 | 2.587172  | -1.401716 |
| H  | -2.295552 | 4.939969  | -1.724280 |
| H  | -0.145778 | 5.748707  | -0.734295 |
| N  | 0.819046  | 1.597759  | 1.001837  |
| C  | 1.484224  | 2.014978  | 2.137612  |
| O  | 1.411699  | 3.143069  | 2.624464  |
| C  | 2.289590  | 0.954837  | 2.885433  |
| H  | 1.726896  | 0.660145  | 3.779402  |
| H  | 2.497542  | 0.052850  | 2.300456  |
| H  | 3.230716  | 1.398599  | 3.224752  |
| C  | -1.675076 | 0.627649  | -0.097308 |
| C  | -0.815938 | -0.407466 | 0.072793  |
| C  | -3.163554 | 0.406366  | -0.057528 |
| C  | -3.872878 | -0.037122 | -1.183138 |
| C  | -3.878401 | 0.666032  | 1.121970  |
| C  | -5.255626 | -0.228787 | -1.130216 |
| H  | -3.336497 | -0.222298 | -2.110383 |
| C  | -5.258155 | 0.468027  | 1.179581  |
| H  | -3.343254 | 1.024622  | 1.997148  |
| C  | -5.952104 | 0.019397  | 0.053132  |
| H  | -5.786800 | -0.571874 | -2.014611 |
| H  | -5.792585 | 0.667632  | 2.104899  |
| H  | -7.027484 | -0.131799 | 0.097097  |
| C  | -1.203261 | -1.806550 | 0.377661  |
| C  | -1.800873 | -2.665755 | -0.565628 |
| C  | -0.926579 | -2.334017 | 1.657283  |
| C  | -2.097861 | -3.991551 | -0.246726 |
| H  | -2.044718 | -2.282637 | -1.550458 |
| C  | -1.225682 | -3.658358 | 1.976291  |
| H  | -0.492138 | -1.681697 | 2.411023  |
| C  | -1.808045 | -4.496815 | 1.022987  |
| H  | -2.567172 | -4.629821 | -0.991492 |
| H  | -1.011248 | -4.032985 | 2.974085  |
| H  | -2.044510 | -5.528311 | 1.269838  |
| C  | 1.866116  | 1.224449  | -2.660401 |
| H  | 1.869174  | 2.192741  | -2.151167 |
| H  | 2.594289  | 1.273185  | -3.483192 |



|   |          |           |           |
|---|----------|-----------|-----------|
| H | 0.873952 | 1.084944  | -3.096758 |
| C | 2.236242 | -3.455694 | -0.483756 |
| H | 3.000507 | -4.057050 | -0.996616 |
| H | 2.338958 | -3.644217 | 0.589545  |
| H | 1.254710 | -3.826656 | -0.788530 |

8b

B3LYP SCF energy: -1933.92413136 a.u.  
 B3LYP enthalpy: -1933.240781 a.u.  
 B3LYP free energy: -1933.363509 a.u.  
 M06 SCF energy in solution: -1934.46230553 a.u.  
 M06 enthalpy in solution: -1933.778955 a.u.  
 M06 free energy in solution: -1933.901683 a.u.  
 Three lowest frequencies (cm<sup>-1</sup>): 12.6058 17.1845 23.1101

Cartesian coordinates

| ATOM | X         | Y         | Z         |
|------|-----------|-----------|-----------|
| C    | 0.878707  | 1.081039  | 1.735827  |
| C    | 1.846740  | 0.017110  | 1.797719  |
| C    | 2.897266  | 0.307560  | 0.841434  |
| C    | 2.533130  | 1.491205  | 0.126074  |
| C    | 1.304131  | 1.997070  | 0.701006  |
| C    | -0.274389 | 1.241140  | 2.682964  |
| H    | -1.117517 | 1.735323  | 2.202846  |
| H    | -0.604350 | 0.272045  | 3.064854  |
| H    | 0.025900  | 1.861413  | 3.537197  |
| C    | 1.836650  | -1.111062 | 2.785553  |
| H    | 2.157076  | -2.045608 | 2.325361  |
| H    | 2.544465  | -0.898262 | 3.596867  |
| H    | 0.845048  | -1.247240 | 3.223122  |
| C    | 3.302074  | 2.129012  | -0.994669 |
| H    | 4.286177  | 2.446418  | -0.631321 |
| H    | 3.481106  | 1.407514  | -1.795723 |
| H    | 2.761804  | 2.987912  | -1.386690 |
| Rh   | 0.806582  | -0.082955 | -0.190010 |
| C    | 4.080679  | -0.554141 | 0.658551  |
| O    | 4.337377  | -1.528043 | 1.345974  |
| O    | 4.884378  | -0.143199 | -0.350733 |
| C    | 6.064619  | -0.944467 | -0.576426 |
| H    | 6.661981  | -0.961282 | 0.340988  |
| H    | 5.757924  | -1.973732 | -0.788518 |
| C    | 6.820930  | -0.326190 | -1.738031 |
| H    | 7.727697  | -0.906741 | -1.940984 |
| H    | 6.207696  | -0.317424 | -2.645009 |
| H    | 7.115865  | 0.703526  | -1.511154 |
| C    | 0.699987  | 3.302302  | 0.339231  |
| O    | 0.926888  | 3.929240  | -0.679321 |
| O    | -0.117842 | 3.768017  | 1.310914  |
| C    | -0.745618 | 5.042276  | 1.037712  |

|   |           |           |           |
|---|-----------|-----------|-----------|
| H | -1.330043 | 4.952634  | 0.117825  |
| H | 0.036982  | 5.788736  | 0.868834  |
| C | -1.612653 | 5.387967  | 2.234115  |
| H | -1.015173 | 5.448813  | 3.149758  |
| H | -2.095000 | 6.358516  | 2.073300  |
| H | -2.395056 | 4.636204  | 2.380988  |
| C | -1.403591 | -2.596778 | 0.539607  |
| C | -0.088725 | -2.984918 | 0.178942  |
| C | 0.457720  | -4.197913 | 0.606196  |
| C | -0.303806 | -5.075984 | 1.378227  |
| C | -1.607751 | -4.724571 | 1.728662  |
| C | -2.147651 | -3.507746 | 1.310185  |
| H | 1.478331  | -4.438514 | 0.322627  |
| H | 0.120243  | -6.022018 | 1.703160  |
| H | -2.211754 | -5.398325 | 2.330445  |
| H | -3.167862 | -3.261860 | 1.582690  |
| N | 0.668953  | -2.079823 | -0.583200 |
| C | 0.704354  | -1.962592 | -1.905618 |
| O | 0.980385  | -0.782121 | -2.310451 |
| C | 0.447674  | -3.080868 | -2.877646 |
| H | -0.439836 | -2.844135 | -3.474809 |
| H | 1.295015  | -3.161480 | -3.566323 |
| H | 0.296477  | -4.035439 | -2.369528 |
| C | -1.241710 | -0.219438 | -0.318205 |
| C | -1.971773 | -1.305908 | 0.058149  |
| C | -1.842037 | 1.010929  | -0.894536 |
| C | -1.483039 | 1.423459  | -2.194108 |
| C | -2.761215 | 1.804449  | -0.181613 |
| C | -2.042621 | 2.566100  | -2.762999 |
| H | -0.761579 | 0.833803  | -2.751238 |
| C | -3.318234 | 2.949186  | -0.753721 |
| H | -3.057858 | 1.507420  | 0.818292  |
| C | -2.964852 | 3.334738  | -2.048459 |
| H | -1.753960 | 2.858496  | -3.769229 |
| H | -4.038700 | 3.534534  | -0.187115 |
| H | -3.402048 | 4.223742  | -2.495447 |
| C | -3.477219 | -1.281416 | -0.055585 |
| C | -4.098190 | -1.584889 | -1.275489 |
| C | -4.290661 | -0.985897 | 1.049296  |
| C | -5.488977 | -1.582621 | -1.392209 |
| H | -3.481926 | -1.816055 | -2.140156 |
| C | -5.682739 | -0.987759 | 0.937404  |
| H | -3.825484 | -0.748435 | 2.003262  |
| C | -6.286668 | -1.285298 | -0.285490 |
| H | -5.949588 | -1.813472 | -2.349383 |
| H | -6.293939 | -0.752675 | 1.805226  |
| H | -7.369709 | -1.284308 | -0.375522 |

9a

B3LYP SCF energy: -1478.17008497 a.u.  
B3LYP enthalpy: -1477.581797 a.u.  
B3LYP free energy: -1477.682795 a.u.  
M06 SCF energy in solution: -1478.76597549 a.u.  
M06 enthalpy in solution: -1478.177688 a.u.  
M06 free energy in solution: -1478.278686 a.u.  
Three lowest frequencies (cm-1): 20.0528 27.1134 39.5942

Cartesian coordinates

| ATOM | X         | Y         | Z         |
|------|-----------|-----------|-----------|
| C    | 3.066722  | -0.189483 | -1.319682 |
| C    | 2.114883  | 0.336839  | -2.203704 |
| C    | 1.637529  | 1.593503  | -1.610220 |
| C    | 2.492050  | 1.915028  | -0.468997 |
| C    | 3.284007  | 0.782771  | -0.233194 |
| C    | 3.829325  | -1.475726 | -1.449748 |
| H    | 3.378594  | -2.142748 | -2.189633 |
| H    | 4.867963  | -1.290295 | -1.759325 |
| H    | 3.872111  | -2.018066 | -0.498489 |
| C    | 1.687860  | -0.218394 | -3.531388 |
| H    | 0.603681  | -0.170078 | -3.672699 |
| H    | 2.150250  | 0.341163  | -4.357391 |
| H    | 1.985250  | -1.265387 | -3.642355 |
| C    | 2.530612  | 3.229225  | 0.254017  |
| H    | 3.274484  | 3.902873  | -0.196566 |
| H    | 1.566102  | 3.742349  | 0.208856  |
| H    | 2.797826  | 3.109428  | 1.309116  |
| Rh   | 1.041724  | 0.102268  | -0.152875 |
| C    | -0.513690 | -0.237411 | 2.253912  |
| C    | -0.305018 | -1.627748 | 2.144152  |
| C    | -0.007031 | -2.412129 | 3.257020  |
| C    | 0.070638  | -1.773516 | 4.502052  |
| C    | -0.152922 | -0.399915 | 4.630402  |
| C    | -0.450017 | 0.376148  | 3.506543  |
| H    | 0.147266  | -3.475841 | 3.154131  |
| H    | 0.296373  | -2.368306 | 5.383067  |
| H    | -0.102201 | 0.068513  | 5.609670  |
| H    | -0.638410 | 1.441190  | 3.602086  |
| N    | -0.456384 | -2.001555 | 0.773056  |
| C    | -0.026466 | -3.232782 | 0.268527  |
| O    | 0.284645  | -4.147854 | 1.020742  |
| C    | 0.062436  | -3.398826 | -1.237181 |
| H    | 0.421268  | -2.495064 | -1.735576 |
| H    | 0.742215  | -4.232932 | -1.423383 |
| H    | -0.915935 | -3.647161 | -1.659413 |
| C    | -0.841410 | -0.816492 | -0.016823 |
| C    | -0.812255 | 0.320482  | 0.914242  |
| C    | -1.883201 | -1.014345 | -1.069100 |
| C    | -2.886985 | -1.986987 | -0.907504 |
| C    | -1.940937 | -0.190461 | -2.202014 |

|   |           |           |           |
|---|-----------|-----------|-----------|
| C | -3.899938 | -2.136613 | -1.855135 |
| H | -2.875935 | -2.624026 | -0.027522 |
| C | -2.958316 | -0.333139 | -3.145994 |
| H | -1.185229 | 0.575308  | -2.326874 |
| C | -3.940164 | -1.311627 | -2.981582 |
| H | -4.663024 | -2.896680 | -1.708011 |
| H | -2.980831 | 0.321163  | -4.013833 |
| H | -4.728609 | -1.428959 | -3.719987 |
| C | -1.636704 | 1.565877  | 0.827559  |
| C | -3.003735 | 1.541847  | 0.503757  |
| C | -1.068105 | 2.802629  | 1.178395  |
| C | -3.760621 | 2.715204  | 0.499495  |
| H | -3.483449 | 0.600065  | 0.262715  |
| C | -1.825659 | 3.974518  | 1.185912  |
| H | -0.018019 | 2.833552  | 1.449653  |
| C | -3.177125 | 3.937321  | 0.836584  |
| H | -4.815294 | 2.668621  | 0.239964  |
| H | -1.358647 | 4.916351  | 1.463768  |
| H | -3.769593 | 4.848422  | 0.835009  |
| C | 0.747093  | 2.590586  | -2.295026 |
| H | 1.352732  | 3.367108  | -2.784592 |
| H | 0.132836  | 2.123115  | -3.069281 |
| H | 0.077808  | 3.089201  | -1.587130 |
| C | 4.278128  | 0.589134  | 0.874485  |
| H | 5.307460  | 0.706587  | 0.506637  |
| H | 4.129172  | 1.312912  | 1.680801  |
| H | 4.205856  | -0.413825 | 1.310081  |

9b

B3LYP SCF energy: -1933.91294128 a.u.  
 B3LYP enthalpy: -1933.229399 a.u.  
 B3LYP free energy: -1933.352985 a.u.  
 M06 SCF energy in solution: -1934.46259955 a.u.  
 M06 enthalpy in solution: -1933.779057 a.u.  
 M06 free energy in solution: -1933.902643 a.u.  
 Three lowest frequencies (cm<sup>-1</sup>): 12.7022 15.9290 19.9362

Cartesian coordinates

| ATOM | X        | Y         | Z         |
|------|----------|-----------|-----------|
| C    | 2.763679 | -0.513033 | -1.348012 |
| C    | 1.506579 | -0.253854 | -2.012897 |
| C    | 1.084774 | 1.066149  | -1.665870 |
| C    | 2.034642 | 1.599344  | -0.707898 |
| C    | 3.140430 | 0.670850  | -0.612636 |
| C    | 3.578393 | -1.752634 | -1.593658 |
| H    | 2.933158 | -2.591398 | -1.867626 |
| H    | 4.281463 | -1.584026 | -2.420768 |
| H    | 4.168116 | -2.029372 | -0.720838 |
| C    | 0.874708 | -1.194956 | -3.000399 |

|    |           |           |           |
|----|-----------|-----------|-----------|
| H  | -0.142621 | -0.884558 | -3.233334 |
| H  | 1.453322  | -1.205425 | -3.935141 |
| H  | 0.859788  | -2.219613 | -2.617513 |
| C  | 2.005448  | 2.968604  | -0.085932 |
| H  | 2.316707  | 3.716698  | -0.827233 |
| H  | 0.997805  | 3.241484  | 0.228530  |
| H  | 2.694804  | 3.018362  | 0.754613  |
| Rh | 1.262659  | -0.323219 | 0.311098  |
| C  | -0.185009 | 1.664524  | -2.106451 |
| O  | -1.080999 | 1.076746  | -2.700696 |
| O  | -0.283454 | 2.983292  | -1.801787 |
| C  | -1.517725 | 3.627863  | -2.182213 |
| H  | -1.698931 | 3.448048  | -3.246182 |
| H  | -2.340983 | 3.173116  | -1.621092 |
| C  | -1.374473 | 5.106909  | -1.871673 |
| H  | -2.291018 | 5.635962  | -2.155400 |
| H  | -1.201947 | 5.269492  | -0.802684 |
| H  | -0.537655 | 5.544295  | -2.425798 |
| C  | 4.374278  | 0.914263  | 0.152460  |
| O  | 4.592640  | 1.872567  | 0.877424  |
| O  | 5.312968  | -0.049378 | -0.056084 |
| C  | 6.552301  | 0.127084  | 0.658537  |
| H  | 6.344637  | 0.155879  | 1.733405  |
| H  | 6.987370  | 1.093485  | 0.383627  |
| C  | 7.463072  | -1.029951 | 0.288138  |
| H  | 7.654373  | -1.048479 | -0.789824 |
| H  | 8.423116  | -0.928370 | 0.806456  |
| H  | 7.018017  | -1.988500 | 0.575278  |
| C  | -0.468797 | -0.560352 | 1.700827  |
| C  | -0.114936 | -1.807130 | 1.098036  |
| C  | 1.192343  | -2.327121 | 1.369935  |
| C  | 1.800261  | -1.983599 | 2.658776  |
| C  | 1.481436  | -0.787587 | 3.214682  |
| C  | 0.522213  | 0.061271  | 2.511154  |
| H  | 1.521108  | -3.207995 | 0.839021  |
| H  | 2.516042  | -2.665513 | 3.108770  |
| H  | 1.929666  | -0.434473 | 4.138845  |
| H  | 0.346404  | 1.069186  | 2.872319  |
| N  | -1.238608 | -2.268479 | 0.363956  |
| C  | -1.143670 | -3.388938 | -0.485511 |
| O  | -0.071675 | -3.963035 | -0.597636 |
| C  | -2.360089 | -3.874520 | -1.243145 |
| H  | -2.729075 | -3.121390 | -1.944242 |
| H  | -2.045240 | -4.762478 | -1.793297 |
| H  | -3.186543 | -4.129032 | -0.575354 |
| C  | -2.275851 | -1.295419 | 0.520022  |
| C  | -1.834033 | -0.252568 | 1.293126  |
| C  | -3.605370 | -1.381639 | -0.137214 |
| C  | -4.640883 | -2.149547 | 0.417992  |
| C  | -3.850451 | -0.640519 | -1.304231 |
| C  | -5.896460 | -2.188934 | -0.188671 |

|   |           |           |           |
|---|-----------|-----------|-----------|
| H | -4.458725 | -2.713144 | 1.329885  |
| C | -5.108839 | -0.684595 | -1.908836 |
| H | -3.054545 | -0.038915 | -1.735933 |
| C | -6.131372 | -1.458157 | -1.356118 |
| H | -6.690946 | -2.785486 | 0.251603  |
| H | -5.288074 | -0.110104 | -2.813561 |
| H | -7.109180 | -1.488516 | -1.829300 |
| C | -2.577263 | 0.963585  | 1.683708  |
| C | -3.879200 | 0.904082  | 2.208127  |
| C | -1.966423 | 2.224463  | 1.557802  |
| C | -4.551222 | 2.066794  | 2.584095  |
| H | -4.362502 | -0.059628 | 2.328354  |
| C | -2.638418 | 3.386304  | 1.938037  |
| H | -0.967791 | 2.290986  | 1.137379  |
| C | -3.934465 | 3.312546  | 2.452488  |
| H | -5.557495 | 1.997167  | 2.988898  |
| H | -2.147624 | 4.350392  | 1.831302  |
| H | -4.457905 | 4.217028  | 2.750492  |

10a

B3LYP SCF energy: -1152.92165286 a.u.  
 B3LYP enthalpy: -1152.436627 a.u.  
 B3LYP free energy: -1152.527312 a.u.  
 M06 SCF energy in solution: -1153.69019929 a.u.  
 M06 enthalpy in solution: -1153.205173 a.u.  
 M06 free energy in solution: -1153.295858 a.u.  
 Three lowest frequencies (cm<sup>-1</sup>): 17.3697 21.6348 42.5937

Cartesian coordinates

| ATOM | X         | Y         | Z         |
|------|-----------|-----------|-----------|
| C    | 3.501737  | -0.112755 | 2.060566  |
| C    | 2.605664  | 0.540227  | 1.211346  |
| C    | 2.798513  | 0.542742  | -0.178891 |
| C    | 3.925171  | -0.118223 | -0.689819 |
| C    | 4.821570  | -0.776730 | 0.157116  |
| C    | 4.612509  | -0.780259 | 1.536968  |
| H    | 3.334072  | -0.095816 | 3.135234  |
| H    | 4.112678  | -0.127229 | -1.759761 |
| H    | 5.684626  | -1.286460 | -0.264849 |
| H    | 5.309828  | -1.290333 | 2.196743  |
| C    | 1.808320  | 1.323367  | -1.066012 |
| C    | -2.466471 | -1.373334 | -0.502807 |
| C    | -1.268951 | -1.669764 | -1.283485 |
| C    | -0.215500 | -2.007452 | -0.364038 |
| C    | -2.135183 | -1.471876 | 0.875818  |
| C    | -0.723048 | -1.814603 | 0.966543  |
| Rh   | -0.893103 | 0.107265  | -0.057884 |
| O    | -1.333954 | 1.663097  | 1.513502  |
| C    | -1.966011 | 2.364796  | 0.661360  |

|   |           |           |           |
|---|-----------|-----------|-----------|
| O | -2.180431 | 1.914778  | -0.506151 |
| C | -2.428292 | 3.755933  | 1.031874  |
| H | -2.663993 | 3.812707  | 2.097721  |
| H | -1.612899 | 4.459232  | 0.825441  |
| H | -3.293892 | 4.048686  | 0.432589  |
| C | -1.240670 | -1.786085 | -2.777846 |
| H | -1.813443 | -0.981629 | -3.248982 |
| H | -0.222289 | -1.742649 | -3.169026 |
| H | -1.683384 | -2.740446 | -3.095923 |
| C | 1.132446  | -2.571405 | -0.694209 |
| H | 1.126647  | -3.655291 | -0.512707 |
| H | 1.397020  | -2.414479 | -1.741817 |
| H | 1.920650  | -2.129657 | -0.081120 |
| C | 0.021598  | -2.065761 | 2.241072  |
| H | -0.347036 | -1.422884 | 3.045591  |
| H | -0.110805 | -3.109667 | 2.559408  |
| H | 1.091648  | -1.879671 | 2.122089  |
| C | -3.031785 | -1.234195 | 2.054425  |
| H | -3.205180 | -2.169234 | 2.602816  |
| H | -2.586935 | -0.509914 | 2.743798  |
| H | -4.003767 | -0.841793 | 1.745607  |
| C | -3.795477 | -1.016016 | -1.095439 |
| H | -4.285486 | -1.910558 | -1.502907 |
| H | -4.462220 | -0.572689 | -0.352687 |
| H | -3.682054 | -0.292274 | -1.907698 |
| C | 2.318334  | 2.787160  | -1.161080 |
| H | 3.326205  | 2.832903  | -1.590849 |
| H | 1.634868  | 3.371107  | -1.786976 |
| H | 2.342618  | 3.235162  | -0.163359 |
| C | 1.707128  | 0.753840  | -2.496379 |
| H | 0.905841  | 1.284985  | -3.019827 |
| H | 2.633366  | 0.888495  | -3.066716 |
| H | 1.467553  | -0.313268 | -2.491606 |
| O | 0.545157  | 1.428457  | -0.467311 |
| H | 1.739624  | 1.057435  | 1.611715  |

10b

B3LYP SCF energy: -1608.66108841 a.u.  
 B3LYP enthalpy: -1608.080298 a.u.  
 B3LYP free energy: -1608.190757 a.u.  
 M06 SCF energy in solution: -1609.38489038 a.u.  
 M06 enthalpy in solution: -1608.804100 a.u.  
 M06 free energy in solution: -1608.914559 a.u.  
 Three lowest frequencies (cm-1): 16.2602 22.8962 25.0307

Cartesian coordinates

| ATOM | X        | Y         | Z         |
|------|----------|-----------|-----------|
| C    | 2.797025 | -3.084085 | -1.760243 |
| C    | 2.209486 | -2.579789 | -0.597940 |

|    |           |           |           |
|----|-----------|-----------|-----------|
| C  | 2.900261  | -1.676462 | 0.225080  |
| C  | 4.203688  | -1.311212 | -0.141435 |
| C  | 4.793365  | -1.813743 | -1.304689 |
| C  | 4.090692  | -2.699537 | -2.122950 |
| H  | 2.243336  | -3.784906 | -2.381008 |
| H  | 4.773101  | -0.626891 | 0.481343  |
| H  | 5.803946  | -1.511573 | -1.569412 |
| H  | 4.548378  | -3.091716 | -3.027628 |
| C  | 2.230786  | -1.178895 | 1.520425  |
| C  | -1.432679 | 1.669360  | -0.112798 |
| C  | 0.011611  | 1.812149  | -0.226722 |
| C  | 0.476713  | 0.967254  | -1.307988 |
| C  | -1.846699 | 0.749418  | -1.134430 |
| C  | -0.671392 | 0.283079  | -1.839093 |
| Rh | -0.481085 | -0.280398 | 0.294513  |
| O  | -1.360337 | -2.289006 | 0.242050  |
| C  | -1.909032 | -2.121109 | 1.383874  |
| O  | -1.844196 | -0.987984 | 1.944964  |
| C  | -2.591397 | -3.282748 | 2.061993  |
| H  | -3.368110 | -2.926492 | 2.742890  |
| H  | -3.013733 | -3.967120 | 1.321894  |
| H  | -1.844373 | -3.830772 | 2.648133  |
| C  | 1.852386  | 0.890561  | -1.895610 |
| H  | 2.630152  | 1.016848  | -1.146210 |
| H  | 2.015806  | -0.065129 | -2.395862 |
| H  | 1.970732  | 1.693770  | -2.635078 |
| C  | -0.654138 | -0.718222 | -2.951471 |
| H  | -1.393264 | -1.501466 | -2.779480 |
| H  | -0.917332 | -0.227284 | -3.896671 |
| H  | 0.333559  | -1.172220 | -3.054634 |
| C  | -2.322733 | 2.376794  | 0.865049  |
| H  | -3.066514 | 2.970992  | 0.322175  |
| H  | -2.866928 | 1.648493  | 1.470939  |
| H  | -1.737752 | 3.023056  | 1.516537  |
| C  | -3.222199 | 0.292104  | -1.461888 |
| O  | -3.516928 | -0.249931 | -2.509957 |
| C  | 0.796699  | 2.803903  | 0.559533  |
| O  | 0.462898  | 3.270601  | 1.630374  |
| O  | 1.923834  | 3.169807  | -0.086100 |
| O  | -4.108867 | 0.558938  | -0.485454 |
| C  | 2.752631  | 4.142516  | 0.599331  |
| H  | 2.154874  | 5.040869  | 0.780704  |
| H  | 3.039299  | 3.730722  | 1.571725  |
| C  | 3.953911  | 4.421444  | -0.283910 |
| H  | 4.600131  | 5.162892  | 0.198298  |
| H  | 4.540308  | 3.512253  | -0.450802 |
| H  | 3.643285  | 4.816855  | -1.256378 |
| C  | -5.472133 | 0.141174  | -0.740717 |
| H  | -5.475223 | -0.936263 | -0.931245 |
| H  | -5.827453 | 0.640698  | -1.647730 |
| C  | -6.296378 | 0.509039  | 0.478480  |



|   |           |           |           |
|---|-----------|-----------|-----------|
| H | -7.336339 | 0.199631  | 0.327416  |
| H | -5.913447 | 0.009165  | 1.373820  |
| H | -6.281277 | 1.589779  | 0.652589  |
| O | 0.830091  | -1.240130 | 1.433085  |
| C | 2.577705  | -2.183264 | 2.652820  |
| H | 3.662066  | -2.254142 | 2.797869  |
| H | 2.110840  | -1.856680 | 3.588132  |
| H | 2.193027  | -3.175166 | 2.398603  |
| C | 2.713642  | 0.221400  | 1.949563  |
| H | 2.098266  | 0.557955  | 2.789492  |
| H | 3.759814  | 0.213903  | 2.275986  |
| H | 2.622401  | 0.950130  | 1.139595  |
| H | 1.204383  | -2.877392 | -0.316334 |

11a

B3LYP SCF energy: -923.82198973 a.u.  
 B3LYP enthalpy: -923.406515 a.u.  
 B3LYP free energy: -923.483203 a.u.  
 M06 SCF energy in solution: -924.60618286 a.u.  
 M06 enthalpy in solution: -924.190708 a.u.  
 M06 free energy in solution: -924.267396 a.u.  
 Three lowest frequencies (cm-1): 14.7271 30.5875 78.1306

Cartesian coordinates

| ATOM | X         | Y         | Z         |
|------|-----------|-----------|-----------|
| C    | 1.755415  | 2.128164  | 0.000031  |
| C    | 1.462483  | 0.753744  | 0.000031  |
| C    | 2.545324  | -0.158386 | 0.000008  |
| C    | 3.866315  | 0.308774  | -0.000013 |
| C    | 4.132960  | 1.676707  | -0.000011 |
| C    | 3.072741  | 2.588870  | 0.000004  |
| H    | 0.951324  | 2.857522  | 0.000052  |
| H    | 4.693570  | -0.398749 | -0.000034 |
| H    | 5.160861  | 2.031504  | -0.000030 |
| H    | 3.274781  | 3.658018  | 0.000005  |
| C    | 2.180141  | -1.625917 | 0.000003  |
| C    | -1.876781 | 1.482027  | 0.000213  |
| C    | -2.036851 | 0.643064  | -1.149094 |
| C    | -2.500027 | -0.678482 | -0.700371 |
| C    | -2.037006 | 0.642646  | 1.149204  |
| C    | -2.500136 | -0.678732 | 0.699962  |
| Rh   | -0.347782 | -0.159449 | 0.000019  |
| C    | -1.972968 | 1.080114  | -2.581766 |
| H    | -2.967896 | 1.386745  | -2.935976 |
| H    | -1.294533 | 1.927143  | -2.712896 |
| H    | -1.626073 | 0.270881  | -3.230882 |
| C    | -1.663011 | 2.966164  | 0.000499  |
| H    | -1.110631 | 3.298078  | -0.883067 |
| H    | -2.628925 | 3.490321  | 0.000600  |

|   |           |           |           |
|---|-----------|-----------|-----------|
| H | -1.110620 | 3.297742  | 0.884184  |
| C | -1.973274 | 1.079182  | 2.582038  |
| H | -2.968256 | 1.385616  | 2.936267  |
| H | -1.626385 | 0.269735  | 3.230890  |
| H | -1.294911 | 1.926212  | 2.713536  |
| C | -2.857972 | -1.808939 | 1.617917  |
| H | -2.142378 | -1.894794 | 2.442044  |
| H | -3.852193 | -1.655245 | 2.059860  |
| H | -2.870154 | -2.766961 | 1.091999  |
| C | -2.857733 | -1.808357 | -1.618782 |
| H | -2.870108 | -2.766556 | -1.093192 |
| H | -3.851844 | -1.654437 | -2.060895 |
| H | -2.141962 | -1.893983 | -2.442778 |
| O | 0.765752  | -1.752717 | -0.000001 |
| C | 2.701793  | -2.336263 | -1.266746 |
| H | 3.796396  | -2.312540 | -1.320505 |
| H | 2.374280  | -3.381600 | -1.264226 |
| H | 2.300085  | -1.846215 | -2.159795 |
| C | 2.701769  | -2.336249 | 1.266771  |
| H | 2.374207  | -3.381570 | 1.264279  |
| H | 3.796374  | -2.312564 | 1.320509  |
| H | 2.300093  | -1.846150 | 2.159806  |

11b

B3LYP SCF energy: -1379.56746777 a.u.  
 B3LYP enthalpy: -1379.056335 a.u.  
 B3LYP free energy: -1379.156287 a.u.  
 M06 SCF energy in solution: -1380.30541257 a.u.  
 M06 enthalpy in solution: -1379.794280 a.u.  
 M06 free energy in solution: -1379.894232 a.u.  
 Three lowest frequencies (cm<sup>-1</sup>): 13.1168 18.4663 19.5213

Cartesian coordinates

| ATOM | X         | Y         | Z         |
|------|-----------|-----------|-----------|
| C    | -2.903275 | -0.824012 | -0.332385 |
| C    | -1.620082 | -1.371556 | -0.175331 |
| C    | -1.458385 | -2.772459 | -0.268891 |
| C    | -2.567224 | -3.590468 | -0.522401 |
| C    | -3.834300 | -3.031844 | -0.679480 |
| C    | -4.002289 | -1.645957 | -0.584001 |
| H    | -3.052132 | 0.249486  | -0.261961 |
| H    | -2.442305 | -4.669095 | -0.594692 |
| H    | -4.690277 | -3.673060 | -0.874697 |
| H    | -4.990584 | -1.208803 | -0.708200 |
| C    | -0.053690 | -3.289500 | -0.071084 |
| C    | 0.988718  | 0.998709  | 1.722357  |
| C    | 1.843069  | 1.141108  | 0.585971  |
| C    | 1.030056  | 1.551432  | -0.534932 |
| C    | -0.354905 | 1.423374  | 1.348567  |

|    |           |           |           |
|----|-----------|-----------|-----------|
| C  | -0.309244 | 1.811807  | -0.033975 |
| Rh | 0.104452  | -0.385471 | 0.163585  |
| C  | 1.391294  | 0.547642  | 3.092396  |
| H  | 2.206445  | -0.173172 | 3.045585  |
| H  | 1.755547  | 1.407812  | 3.670439  |
| H  | 0.546255  | 0.110972  | 3.629673  |
| C  | -1.492888 | 1.565775  | 2.317289  |
| H  | -1.621651 | 2.619702  | 2.594273  |
| H  | -2.434594 | 1.222673  | 1.889983  |
| H  | -1.299504 | 0.998156  | 3.230096  |
| C  | 1.504562  | 1.788814  | -1.937341 |
| H  | 0.661265  | 1.929523  | -2.609252 |
| H  | 2.122313  | 2.696876  | -1.960516 |
| H  | 2.135247  | 0.966321  | -2.275388 |
| C  | -1.391953 | 2.425186  | -0.845304 |
| O  | -1.324597 | 2.687126  | -2.030920 |
| C  | 3.289573  | 0.828292  | 0.617881  |
| O  | 3.922328  | 0.641481  | 1.641934  |
| O  | -2.486311 | 2.708869  | -0.101333 |
| O  | 3.852736  | 0.796334  | -0.608095 |
| C  | -3.583491 | 3.331632  | -0.813783 |
| H  | -3.894449 | 2.667890  | -1.626213 |
| H  | -3.223410 | 4.261674  | -1.264108 |
| C  | -4.697858 | 3.574257  | 0.186878  |
| H  | -4.363804 | 4.232336  | 0.995537  |
| H  | -5.546647 | 4.050821  | -0.315513 |
| H  | -5.044263 | 2.633452  | 0.626966  |
| C  | 5.268273  | 0.498167  | -0.640562 |
| H  | 5.431788  | -0.473415 | -0.164532 |
| H  | 5.799433  | 1.251360  | -0.049818 |
| C  | 5.701409  | 0.501393  | -2.094711 |
| H  | 6.772297  | 0.280279  | -2.161453 |
| H  | 5.157678  | -0.257137 | -2.667048 |
| H  | 5.522834  | 1.477990  | -2.556449 |
| O  | 0.818650  | -2.182136 | 0.125731  |
| C  | 0.048695  | -4.183999 | 1.181562  |
| H  | -0.572435 | -5.081709 | 1.083416  |
| H  | 1.089203  | -4.491234 | 1.330628  |
| H  | -0.281537 | -3.628896 | 2.065644  |
| C  | 0.458338  | -4.043145 | -1.316069 |
| H  | 1.498222  | -4.348543 | -1.159749 |
| H  | -0.142938 | -4.937529 | -1.515315 |
| H  | 0.412827  | -3.389814 | -2.193094 |

12a

B3LYP SCF energy: -1463.27249012 a.u.  
 B3LYP enthalpy: -1462.651483 a.u.  
 B3LYP free energy: -1462.755588 a.u.  
 M06 SCF energy in solution: -1463.84582644 a.u.

M06 enthalpy in solution: -1463.224819 a.u.  
M06 free energy in solution: -1463.328924 a.u.  
Three lowest frequencies (cm-1): 17.2945 21.2115 28.7758

Cartesian coordinates

| ATOM | X         | Y         | Z         |
|------|-----------|-----------|-----------|
| C    | -2.940679 | -0.532824 | -0.088422 |
| C    | -1.697148 | -0.841682 | 0.471213  |
| C    | -1.643689 | -1.446614 | 1.740702  |
| C    | -2.836303 | -1.742868 | 2.414064  |
| C    | -4.075767 | -1.454031 | 1.838836  |
| C    | -4.127668 | -0.845188 | 0.584785  |
| H    | -2.997699 | -0.026794 | -1.047534 |
| H    | -2.798231 | -2.207580 | 3.397451  |
| H    | -4.992476 | -1.697908 | 2.370294  |
| H    | -5.086247 | -0.601030 | 0.131925  |
| C    | -0.262814 | -1.699477 | 2.322334  |
| C    | -0.488348 | -1.297154 | -2.537975 |
| C    | 0.458478  | -0.246327 | -2.726477 |
| C    | 1.741251  | -0.679762 | -2.195838 |
| C    | 0.162854  | -2.334949 | -1.779485 |
| C    | 1.562673  | -1.961262 | -1.628427 |
| Rh   | 0.117951  | -0.566991 | -0.429155 |
| C    | 0.238876  | 1.015927  | -3.507830 |
| H    | 0.503955  | 0.873467  | -4.565171 |
| H    | -0.804630 | 1.341703  | -3.469684 |
| H    | 0.859162  | 1.832653  | -3.125877 |
| C    | -1.858567 | -1.375978 | -3.141900 |
| H    | -2.293516 | -0.384483 | -3.300131 |
| H    | -1.809036 | -1.871345 | -4.121959 |
| H    | -2.547578 | -1.947648 | -2.515694 |
| C    | -0.405238 | -3.678224 | -1.427589 |
| H    | -0.179574 | -4.419604 | -2.207433 |
| H    | 0.016658  | -4.042503 | -0.486538 |
| H    | -1.491245 | -3.634598 | -1.309633 |
| C    | 2.571008  | -2.799458 | -0.905465 |
| H    | 2.628077  | -3.806134 | -1.337838 |
| H    | 3.570275  | -2.358040 | -0.944140 |
| H    | 2.274328  | -2.893744 | 0.147791  |
| C    | 3.022529  | 0.094103  | -2.311655 |
| H    | 3.778261  | -0.269053 | -1.611142 |
| H    | 3.437239  | 0.012744  | -3.326177 |
| H    | 2.874795  | 1.158512  | -2.103511 |
| C    | 0.999651  | 1.264631  | 0.464979  |
| C    | -0.161316 | 1.635932  | 0.183031  |
| C    | 2.360791  | 1.464989  | 0.909078  |
| C    | 3.091331  | 0.459094  | 1.567286  |
| C    | 2.968821  | 2.714952  | 0.672304  |
| C    | 4.400000  | 0.707870  | 1.978069  |
| H    | 2.600537  | -0.492342 | 1.746636  |
| C    | 4.277065  | 2.951595  | 1.088495  |

|   |           |           |           |
|---|-----------|-----------|-----------|
| H | 2.404705  | 3.493007  | 0.165813  |
| C | 4.998303  | 1.948584  | 1.741574  |
| H | 4.956348  | -0.072836 | 2.490686  |
| H | 4.733503  | 3.920155  | 0.901686  |
| H | 6.018947  | 2.134476  | 2.065469  |
| C | -1.307365 | 2.501866  | 0.067573  |
| C | -1.364286 | 3.452478  | -0.971412 |
| C | -2.357338 | 2.455597  | 1.004804  |
| C | -2.440000 | 4.332885  | -1.066586 |
| H | -0.554762 | 3.498060  | -1.693311 |
| C | -3.427416 | 3.342191  | 0.903541  |
| H | -2.323733 | 1.723481  | 1.803232  |
| C | -3.475509 | 4.280706  | -0.130056 |
| H | -2.467449 | 5.063216  | -1.871002 |
| H | -4.228712 | 3.296779  | 1.635971  |
| H | -4.313500 | 4.968498  | -0.204578 |
| O | 0.703499  | -1.501067 | 1.305471  |
| C | -0.002021 | -0.719939 | 3.491722  |
| H | -0.725956 | -0.856557 | 4.304839  |
| H | 1.004556  | -0.879770 | 3.896019  |
| H | -0.070093 | 0.314257  | 3.139972  |
| C | -0.105813 | -3.151651 | 2.821666  |
| H | 0.927534  | -3.313663 | 3.148555  |
| H | -0.769811 | -3.370795 | 3.666643  |
| H | -0.328499 | -3.857521 | 2.014941  |

12b

B3LYP SCF energy: -1919.01959840 a.u.  
 B3LYP enthalpy: -1918.302791 a.u.  
 B3LYP free energy: -1918.427807 a.u.  
 M06 SCF energy in solution: -1919.55014171 a.u.  
 M06 enthalpy in solution: -1918.833334 a.u.  
 M06 free energy in solution: -1918.958350 a.u.  
 Three lowest frequencies (cm-1): 14.9933 18.2909 21.8570

Cartesian coordinates

| ATOM | X        | Y         | Z         |
|------|----------|-----------|-----------|
| C    | 2.820675 | 1.372329  | -0.304698 |
| C    | 1.936678 | 0.656468  | 0.504933  |
| C    | 2.277145 | 0.367146  | 1.837320  |
| C    | 3.507250 | 0.812573  | 2.338275  |
| C    | 4.397596 | 1.518489  | 1.526035  |
| C    | 4.055696 | 1.794937  | 0.202129  |
| H    | 2.558560 | 1.617300  | -1.328463 |
| H    | 3.776243 | 0.600880  | 3.371149  |
| H    | 5.352372 | 1.850133  | 1.926631  |
| H    | 4.740132 | 2.344787  | -0.439578 |
| C    | 1.253798 | -0.403408 | 2.651856  |
| C    | 0.525394 | -0.510415 | -2.416181 |

|    |           |           |           |
|----|-----------|-----------|-----------|
| C  | 1.140698  | -1.575982 | -1.651902 |
| C  | 0.105344  | -2.347792 | -1.010606 |
| C  | -0.883173 | -0.595677 | -2.205452 |
| C  | -1.148345 | -1.734534 | -1.353405 |
| Rh | 0.173622  | -0.151489 | -0.120744 |
| C  | 1.197610  | 0.415310  | -3.392222 |
| H  | 2.270125  | 0.464179  | -3.214327 |
| H  | 1.062721  | 0.041004  | -4.416080 |
| H  | 0.777332  | 1.424956  | -3.349286 |
| C  | -1.893535 | 0.295251  | -2.868460 |
| H  | -2.498927 | -0.281482 | -3.576740 |
| H  | -2.585874 | 0.730634  | -2.144470 |
| H  | -1.400436 | 1.099725  | -3.419162 |
| C  | 0.289484  | -3.537497 | -0.122638 |
| H  | 0.325415  | -3.187856 | 0.919148  |
| H  | -0.557028 | -4.216681 | -0.218084 |
| H  | 1.226653  | -4.049168 | -0.340666 |
| C  | -2.464691 | -2.259828 | -0.929950 |
| O  | -2.637889 | -3.258628 | -0.254563 |
| C  | 2.601836  | -1.850790 | -1.682866 |
| O  | 3.338117  | -1.474328 | -2.577320 |
| O  | -3.493557 | -1.513608 | -1.398735 |
| O  | 3.040024  | -2.556049 | -0.622085 |
| C  | -4.814483 | -1.964924 | -1.021822 |
| H  | -4.867874 | -2.020565 | 0.068819  |
| H  | -4.966678 | -2.974317 | -1.418156 |
| C  | -5.814304 | -0.972840 | -1.586826 |
| H  | -5.732942 | -0.906739 | -2.676974 |
| H  | -6.832358 | -1.292341 | -1.337682 |
| H  | -5.653815 | 0.023106  | -1.161979 |
| C  | 4.466006  | -2.806283 | -0.588506 |
| H  | 4.983756  | -1.842642 | -0.598142 |
| H  | 4.749750  | -3.348813 | -1.495946 |
| C  | 4.763387  | -3.599716 | 0.669644  |
| H  | 5.836721  | -3.813181 | 0.724706  |
| H  | 4.477940  | -3.035496 | 1.562761  |
| H  | 4.223051  | -4.552043 | 0.672616  |
| C  | -1.385528 | 1.134209  | 0.698745  |
| C  | -0.614073 | 1.962372  | 0.158658  |
| C  | -2.611267 | 0.755815  | 1.368856  |
| C  | -2.732361 | -0.432737 | 2.109138  |
| C  | -3.719526 | 1.621736  | 1.263978  |
| C  | -3.941548 | -0.741857 | 2.731764  |
| H  | -1.863821 | -1.076729 | 2.195130  |
| C  | -4.920918 | 1.303494  | 1.892454  |
| H  | -3.625643 | 2.540639  | 0.692325  |
| C  | -5.036693 | 0.119570  | 2.627796  |
| H  | -4.025456 | -1.661838 | 3.303915  |
| H  | -5.766553 | 1.981296  | 1.810355  |
| H  | -5.974606 | -0.126524 | 3.118643  |
| C  | -0.094572 | 3.219390  | -0.316683 |

|   |           |           |           |
|---|-----------|-----------|-----------|
| C | 0.910210  | 3.911353  | 0.385799  |
| C | -0.633335 | 3.795847  | -1.484703 |
| C | 1.355341  | 5.150558  | -0.069917 |
| H | 1.332228  | 3.470498  | 1.281517  |
| C | -0.179599 | 5.034028  | -1.934014 |
| H | -1.413686 | 3.268564  | -2.024569 |
| C | 0.816351  | 5.714538  | -1.228837 |
| H | 2.128893  | 5.676319  | 0.482801  |
| H | -0.606148 | 5.469094  | -2.833798 |
| H | 1.169199  | 6.680288  | -1.580216 |
| O | 0.277988  | -0.922381 | 1.762591  |
| C | 1.883485  | -1.616082 | 3.367465  |
| H | 2.618026  | -1.311086 | 4.122572  |
| H | 1.096740  | -2.190284 | 3.868976  |
| H | 2.374780  | -2.266124 | 2.637459  |
| C | 0.588663  | 0.529553  | 3.689627  |
| H | -0.179386 | -0.018982 | 4.246758  |
| H | 1.321501  | 0.922322  | 4.405393  |
| H | 0.110454  | 1.376504  | 3.188312  |

13a

B3LYP SCF energy: -1463.29476990 a.u.  
 B3LYP enthalpy: -1462.672192 a.u.  
 B3LYP free energy: -1462.771943 a.u.  
 M06 SCF energy in solution: -1463.86843675 a.u.  
 M06 enthalpy in solution: -1463.245859 a.u.  
 M06 free energy in solution: -1463.345610 a.u.  
 Three lowest frequencies (cm-1): 25.3483 29.3166 35.4566

Cartesian coordinates

| ATOM | X         | Y         | Z         |
|------|-----------|-----------|-----------|
| C    | 0.526752  | -2.391662 | 1.626503  |
| C    | 0.612878  | -1.709978 | 0.385169  |
| C    | -0.178099 | -2.172540 | -0.717799 |
| C    | -0.990691 | -3.312952 | -0.497501 |
| C    | -1.042802 | -3.969796 | 0.722687  |
| C    | -0.278749 | -3.502773 | 1.803242  |
| H    | 1.142508  | -2.028745 | 2.445196  |
| H    | -1.582684 | -3.701697 | -1.316890 |
| H    | -1.667847 | -4.852384 | 0.834103  |
| H    | -0.307253 | -4.013794 | 2.762034  |
| C    | -0.135352 | -1.496458 | -2.126187 |
| C    | -2.638947 | 0.220142  | 1.689924  |
| C    | -2.098263 | 1.508706  | 1.451860  |
| C    | -2.368296 | 1.831580  | 0.062338  |
| C    | -3.403961 | -0.196064 | 0.508098  |
| C    | -3.257238 | 0.792882  | -0.472047 |
| Rh   | -1.073369 | 0.099016  | -0.004836 |
| C    | -1.447381 | 2.414973  | 2.452530  |

|   |           |           |           |
|---|-----------|-----------|-----------|
| H | -2.191937 | 3.092464  | 2.894216  |
| H | -0.987570 | 1.852229  | 3.270401  |
| H | -0.671892 | 3.031788  | 1.991944  |
| C | -2.621214 | -0.540673 | 2.982841  |
| H | -1.837232 | -0.179070 | 3.653773  |
| H | -3.582067 | -0.437594 | 3.506798  |
| H | -2.452654 | -1.610050 | 2.817636  |
| C | -4.191686 | -1.470185 | 0.428053  |
| H | -5.039334 | -1.452786 | 1.126818  |
| H | -4.592741 | -1.633519 | -0.575957 |
| H | -3.576608 | -2.340659 | 0.685196  |
| C | -3.775432 | 0.792296  | -1.877903 |
| H | -4.459480 | -0.041903 | -2.057166 |
| H | -4.312295 | 1.722207  | -2.102340 |
| H | -2.937798 | 0.700693  | -2.581548 |
| C | -2.099695 | 3.145942  | -0.607337 |
| H | -1.994943 | 3.023024  | -1.689184 |
| H | -2.926606 | 3.848893  | -0.427847 |
| H | -1.180281 | 3.605447  | -0.237015 |
| C | 0.902900  | 0.613128  | 0.155068  |
| C | 1.576665  | -0.542450 | 0.303605  |
| C | 1.362479  | 1.989897  | -0.062981 |
| C | 1.382615  | 2.508821  | -1.373505 |
| C | 1.752574  | 2.832220  | 0.996268  |
| C | 1.798500  | 3.817982  | -1.610891 |
| H | 1.056657  | 1.863608  | -2.183315 |
| C | 2.162195  | 4.145270  | 0.752715  |
| H | 1.751160  | 2.443379  | 2.011247  |
| C | 2.188885  | 4.643390  | -0.551694 |
| H | 1.817613  | 4.197672  | -2.629648 |
| H | 2.466188  | 4.776573  | 1.584186  |
| H | 2.511495  | 5.663740  | -0.741280 |
| C | 3.034914  | -0.817072 | 0.386215  |
| C | 3.997115  | 0.197228  | 0.569380  |
| C | 3.508047  | -2.140115 | 0.268024  |
| C | 5.356696  | -0.100204 | 0.628185  |
| H | 3.680681  | 1.227314  | 0.668930  |
| C | 4.869400  | -2.436043 | 0.328105  |
| H | 2.801059  | -2.950021 | 0.119547  |
| C | 5.805284  | -1.417844 | 0.509918  |
| H | 6.070885  | 0.707032  | 0.771634  |
| H | 5.196547  | -3.468216 | 0.229408  |
| H | 6.866709  | -1.645805 | 0.559469  |
| O | -0.517767 | -0.145782 | -1.970151 |
| C | 1.272902  | -1.600711 | -2.753090 |
| H | 1.557212  | -2.646099 | -2.929868 |
| H | 1.264109  | -1.080423 | -3.717804 |
| H | 2.033474  | -1.134558 | -2.126421 |
| C | -1.135580 | -2.137890 | -3.112224 |
| H | -1.104142 | -1.553657 | -4.036886 |
| H | -0.893076 | -3.178794 | -3.360976 |



H -2.158622 -2.090067 -2.724960

13b

B3LYP SCF energy: -1919.04055902 a.u.

B3LYP enthalpy: -1918.322324 a.u.

B3LYP free energy: -1918.443663 a.u.

M06 SCF energy in solution: -1919.57043953 a.u.

M06 enthalpy in solution: -1918.852205 a.u.

M06 free energy in solution: -1918.973544 a.u.

Three lowest frequencies (cm-1): 13.2690 17.8219 26.9542

Cartesian coordinates

| ATOM | X         | Y         | Z         |
|------|-----------|-----------|-----------|
| C    | 0.022552  | 2.646657  | -1.895139 |
| C    | -0.207061 | 2.189511  | -0.566656 |
| C    | 0.853846  | 2.295209  | 0.397455  |
| C    | 2.075099  | 2.873435  | -0.043421 |
| C    | 2.258360  | 3.330360  | -1.335425 |
| C    | 1.220847  | 3.214891  | -2.278025 |
| H    | -0.794749 | 2.561146  | -2.606190 |
| H    | 2.888899  | 2.978853  | 0.662931  |
| H    | 3.207593  | 3.775169  | -1.620508 |
| H    | 1.359487  | 3.571647  | -3.294901 |
| C    | 0.685892  | 1.847838  | 1.883700  |
| C    | 1.725152  | -0.968070 | -1.910125 |
| C    | 2.608016  | -1.015223 | -0.739430 |
| C    | 2.000220  | -1.824653 | 0.251983  |
| C    | 0.603418  | -1.795695 | -1.665773 |
| C    | 0.722717  | -2.277413 | -0.297350 |
| Rh   | 0.475913  | -0.086232 | -0.105440 |
| C    | 2.031341  | -0.261749 | -3.196265 |
| H    | 2.315462  | 0.777964  | -3.022167 |
| H    | 2.884192  | -0.737745 | -3.693162 |
| H    | 1.175319  | -0.286237 | -3.875008 |
| C    | -0.469753 | -2.144195 | -2.656974 |
| H    | -0.251482 | -3.107427 | -3.134891 |
| H    | -1.442747 | -2.238608 | -2.174425 |
| H    | -0.541701 | -1.386068 | -3.441306 |
| C    | 2.495125  | -2.144975 | 1.629265  |
| H    | 2.016068  | -1.463843 | 2.344992  |
| H    | 2.213201  | -3.159879 | 1.913195  |
| H    | 3.573535  | -2.013192 | 1.693584  |
| C    | -0.109985 | -3.306519 | 0.378814  |
| O    | -0.079540 | -3.552798 | 1.569298  |
| C    | 3.891688  | -0.287789 | -0.695602 |
| O    | 4.400450  | 0.258702  | -1.660160 |
| O    | -0.882339 | -3.988280 | -0.494495 |
| O    | 4.474868  | -0.277165 | 0.528916  |
| C    | -1.701385 | -5.035218 | 0.078645  |

|   |           |           |           |
|---|-----------|-----------|-----------|
| H | -2.332203 | -4.598732 | 0.856859  |
| H | -1.043092 | -5.772450 | 0.550118  |
| C | -2.521367 | -5.638477 | -1.046085 |
| H | -1.876188 | -6.042549 | -1.833224 |
| H | -3.139643 | -6.454598 | -0.655845 |
| H | -3.183096 | -4.887156 | -1.488532 |
| C | 5.759037  | 0.381309  | 0.602719  |
| H | 5.634369  | 1.430533  | 0.316033  |
| H | 6.435523  | -0.079495 | -0.124182 |
| C | 6.267067  | 0.237673  | 2.025644  |
| H | 7.240832  | 0.730602  | 2.121953  |
| H | 5.575742  | 0.698147  | 2.738773  |
| H | 6.388073  | -0.816620 | 2.295030  |
| C | -1.518163 | 0.339893  | -0.022441 |
| C | -1.592783 | 1.663102  | -0.245254 |
| C | -2.515933 | -0.663825 | 0.357322  |
| C | -2.534561 | -1.161821 | 1.674755  |
| C | -3.463588 | -1.150784 | -0.564546 |
| C | -3.498663 | -2.091218 | 2.062358  |
| H | -1.783513 | -0.803839 | 2.371310  |
| C | -4.422003 | -2.085923 | -0.171383 |
| H | -3.459598 | -0.768385 | -1.581779 |
| C | -4.447472 | -2.554649 | 1.145332  |
| H | -3.507629 | -2.456542 | 3.085891  |
| H | -5.156400 | -2.439269 | -0.891072 |
| H | -5.201422 | -3.274162 | 1.454137  |
| C | -2.741553 | 2.604028  | -0.210023 |
| C | -2.526832 | 3.984964  | -0.394586 |
| C | -4.065508 | 2.183419  | 0.033630  |
| C | -3.579921 | 4.898263  | -0.350788 |
| H | -1.521814 | 4.354536  | -0.569820 |
| C | -5.115097 | 3.097547  | 0.078314  |
| H | -4.277359 | 1.134368  | 0.192614  |
| C | -4.883483 | 4.461347  | -0.117089 |
| H | -3.375329 | 5.955887  | -0.497188 |
| H | -6.123493 | 2.738501  | 0.268520  |
| H | -5.705905 | 5.170814  | -0.083989 |
| O | 0.351400  | 0.473208  | 1.853013  |
| C | 1.994670  | 1.979364  | 2.690559  |
| H | 2.316441  | 3.020341  | 2.820738  |
| H | 1.809825  | 1.557124  | 3.683003  |
| H | 2.803661  | 1.403236  | 2.230650  |
| C | -0.405724 | 2.664998  | 2.604999  |
| H | -0.515099 | 2.276759  | 3.623970  |
| H | -0.133213 | 3.726187  | 2.668778  |
| H | -1.372613 | 2.582392  | 2.108650  |

14a  
B3LYP SCF energy: -1463.31646560 a.u.

B3LYP enthalpy: -1462.693606 a.u.  
 B3LYP free energy: -1462.794773 a.u.  
 M06 SCF energy in solution: -1463.89463645 a.u.  
 M06 enthalpy in solution: -1463.271777 a.u.  
 M06 free energy in solution: -1463.372944 a.u.  
 Three lowest frequencies (cm-1): 22.2567 31.4147 35.3185

Cartesian coordinates

| ATOM | X         | Y         | Z         |
|------|-----------|-----------|-----------|
| C    | -0.837592 | -2.956379 | -1.203994 |
| C    | -0.847660 | -2.078992 | -0.098387 |
| C    | -0.786140 | -2.648389 | 1.194670  |
| C    | -0.705247 | -4.036324 | 1.348978  |
| C    | -0.682368 | -4.885175 | 0.243964  |
| C    | -0.751957 | -4.333452 | -1.038219 |
| H    | -0.904789 | -2.544772 | -2.205097 |
| H    | -0.668357 | -4.464775 | 2.346463  |
| H    | -0.618322 | -5.960882 | 0.382238  |
| H    | -0.746409 | -4.979494 | -1.912601 |
| C    | -0.870691 | -1.714491 | 2.385923  |
| C    | 2.004898  | 1.448830  | -1.408625 |
| C    | 2.494540  | 1.883563  | -0.106306 |
| C    | 3.251084  | 0.818091  | 0.419053  |
| C    | 2.654789  | 0.179180  | -1.744641 |
| C    | 3.354107  | -0.234703 | -0.601357 |
| Rh   | 1.092681  | 0.045302  | -0.001251 |
| C    | 2.207096  | 3.212477  | 0.528624  |
| H    | 2.831387  | 4.006828  | 0.094131  |
| H    | 1.160315  | 3.505515  | 0.394929  |
| H    | 2.403264  | 3.191549  | 1.604709  |
| C    | 1.313137  | 2.355726  | -2.385226 |
| H    | 0.627948  | 3.040254  | -1.876947 |
| H    | 2.050603  | 2.968323  | -2.924951 |
| H    | 0.738115  | 1.800978  | -3.130219 |
| C    | 2.618730  | -0.511198 | -3.077083 |
| H    | 3.475794  | -0.216356 | -3.700708 |
| H    | 2.650801  | -1.600270 | -2.970649 |
| H    | 1.715437  | -0.262481 | -3.642008 |
| C    | 4.158892  | -1.492643 | -0.442542 |
| H    | 3.855698  | -2.258257 | -1.162749 |
| H    | 5.231395  | -1.301466 | -0.594091 |
| H    | 4.048479  | -1.920089 | 0.559955  |
| C    | 3.937013  | 0.763464  | 1.753646  |
| H    | 3.823595  | -0.218592 | 2.226246  |
| H    | 5.016339  | 0.948818  | 1.653232  |
| H    | 3.535774  | 1.510007  | 2.444930  |
| C    | -0.753696 | 0.255927  | 0.871036  |
| C    | -0.953215 | -0.598822 | -0.292715 |
| C    | -1.315188 | 1.597226  | 1.177396  |
| C    | -1.464879 | 2.004676  | 2.516575  |
| C    | -1.653897 | 2.525709  | 0.171181  |

|   |           |           |           |
|---|-----------|-----------|-----------|
| C | -1.952142 | 3.271942  | 2.836779  |
| H | -1.185319 | 1.320883  | 3.308714  |
| C | -2.144806 | 3.788870  | 0.495793  |
| H | -1.532239 | 2.258188  | -0.870719 |
| C | -2.301786 | 4.172353  | 1.830390  |
| H | -2.058417 | 3.553352  | 3.881707  |
| H | -2.404165 | 4.478881  | -0.303446 |
| H | -2.683849 | 5.158698  | 2.079375  |
| C | -1.871625 | -0.190207 | -1.414146 |
| C | -3.245530 | -0.028274 | -1.163010 |
| C | -1.427087 | -0.038462 | -2.734701 |
| C | -4.134856 | 0.292534  | -2.187971 |
| H | -3.617525 | -0.146722 | -0.149152 |
| C | -2.314778 | 0.275516  | -3.767420 |
| H | -0.372123 | -0.173994 | -2.945409 |
| C | -3.672672 | 0.447586  | -3.497120 |
| H | -5.190947 | 0.419568  | -1.963725 |
| H | -1.942156 | 0.386519  | -4.782819 |
| H | -4.364534 | 0.696839  | -4.297311 |
| O | -0.273933 | -0.433075 | 2.012974  |
| C | -2.333681 | -1.493115 | 2.809669  |
| H | -2.785936 | -2.448279 | 3.096693  |
| H | -2.393009 | -0.808473 | 3.662217  |
| H | -2.923294 | -1.077412 | 1.987546  |
| C | -0.024349 | -2.160580 | 3.581347  |
| H | -0.027108 | -1.372634 | 4.341051  |
| H | -0.425713 | -3.071101 | 4.035780  |
| H | 1.009405  | -2.347938 | 3.275810  |

14b

B3LYP SCF energy: -1919.07023533 a.u.  
 B3LYP enthalpy: -1918.351256 a.u.  
 B3LYP free energy: -1918.474191 a.u.  
 M06 SCF energy in solution: -1919.60311312 a.u.  
 M06 enthalpy in solution: -1918.884134 a.u.  
 M06 free energy in solution: -1919.007069 a.u.  
 Three lowest frequencies (cm-1): 13.1468 15.6133 17.3877

Cartesian coordinates

| ATOM | X         | Y         | Z         |
|------|-----------|-----------|-----------|
| C    | 0.101896  | 1.622850  | -1.007388 |
| C    | 1.067730  | 0.528100  | -1.217007 |
| C    | 0.553751  | -0.604865 | -1.787283 |
| C    | -0.865700 | -0.596337 | -2.125470 |
| C    | -1.520919 | 0.620141  | -2.490584 |
| C    | -1.000945 | 1.804093  | -1.899554 |
| H    | 0.423604  | 2.488285  | -0.440000 |
| H    | -1.332027 | -1.526890 | -2.433560 |
| H    | -2.410204 | 0.628982  | -3.112131 |

|    |           |           |           |
|----|-----------|-----------|-----------|
| H  | -1.462185 | 2.774009  | -2.054533 |
| C  | 1.473046  | -1.774122 | -2.070700 |
| C  | -3.041976 | 1.294702  | 1.499144  |
| C  | -3.884587 | 0.344449  | 0.849305  |
| C  | -3.168710 | -0.908083 | 0.765498  |
| C  | -1.841991 | 0.613796  | 1.932810  |
| C  | -1.949869 | -0.770581 | 1.546809  |
| Rh | -1.731523 | 0.498405  | -0.328618 |
| C  | -3.371779 | 2.729679  | 1.795337  |
| H  | -3.928696 | 3.185453  | 0.976690  |
| H  | -4.012580 | 2.796758  | 2.684750  |
| H  | -2.469337 | 3.315128  | 1.991432  |
| C  | -0.785384 | 1.247162  | 2.795907  |
| H  | -0.995844 | 1.051249  | 3.856005  |
| H  | 0.203589  | 0.842390  | 2.585522  |
| H  | -0.764693 | 2.331362  | 2.658332  |
| C  | -3.695120 | -2.195097 | 0.190171  |
| H  | -2.896948 | -2.930435 | 0.114333  |
| H  | -4.475928 | -2.601373 | 0.847077  |
| H  | -4.157972 | -2.029632 | -0.783261 |
| C  | -0.963417 | -1.849717 | 1.750359  |
| O  | -1.014178 | -2.963327 | 1.247071  |
| C  | -5.213087 | 0.686862  | 0.318368  |
| O  | -5.767855 | 1.763921  | 0.475064  |
| O  | 0.048787  | -1.490217 | 2.578433  |
| O  | -5.805065 | -0.332209 | -0.357924 |
| C  | 1.103015  | -2.467799 | 2.734857  |
| H  | 1.540268  | -2.671997 | 1.752379  |
| H  | 0.668125  | -3.399496 | 3.109675  |
| C  | 2.124792  | -1.889750 | 3.696915  |
| H  | 1.665783  | -1.652901 | 4.662573  |
| H  | 2.925882  | -2.617968 | 3.864629  |
| H  | 2.576164  | -0.978268 | 3.291524  |
| C  | -7.128470 | -0.056875 | -0.860453 |
| H  | -7.076320 | 0.781440  | -1.563326 |
| H  | -7.767537 | 0.254664  | -0.027848 |
| C  | -7.639279 | -1.322696 | -1.524903 |
| H  | -8.647921 | -1.154473 | -1.918487 |
| H  | -6.991583 | -1.620035 | -2.356431 |
| H  | -7.682453 | -2.150492 | -0.809646 |
| C  | 3.135732  | -0.610433 | -0.704361 |
| C  | 2.470483  | 0.583171  | -0.803018 |
| C  | 4.490941  | -0.870001 | -0.168018 |
| C  | 5.212433  | -1.978599 | -0.652188 |
| C  | 5.077965  | -0.087498 | 0.844471  |
| C  | 6.483219  | -2.275709 | -0.164786 |
| H  | 4.764307  | -2.604179 | -1.415356 |
| C  | 6.347593  | -0.390158 | 1.331995  |
| H  | 4.537126  | 0.753403  | 1.259885  |
| C  | 7.059542  | -1.481184 | 0.828143  |
| H  | 7.023471  | -3.131601 | -0.560979 |

|   |          |           |           |
|---|----------|-----------|-----------|
| H | 6.778362 | 0.226148  | 2.116711  |
| H | 8.049802 | -1.713449 | 1.210851  |
| C | 3.116496 | 1.900265  | -0.520148 |
| C | 2.766820 | 2.667236  | 0.605121  |
| C | 4.082854 | 2.415025  | -1.398584 |
| C | 3.365957 | 3.905451  | 0.843806  |
| H | 2.034265 | 2.278681  | 1.308293  |
| C | 4.686017 | 3.650537  | -1.159252 |
| H | 4.362326 | 1.834762  | -2.273517 |
| C | 4.328533 | 4.401567  | -0.037952 |
| H | 3.084671 | 4.479214  | 1.723184  |
| H | 5.434327 | 4.027242  | -1.851735 |
| H | 4.796077 | 5.364720  | 0.148037  |
| O | 2.523941 | -1.783257 | -1.058475 |
| C | 0.799918 | -3.140335 | -1.913887 |
| H | 0.079808 | -3.314813 | -2.719690 |
| H | 1.562561 | -3.923637 | -1.969268 |
| H | 0.283856 | -3.217804 | -0.952340 |
| C | 2.129914 | -1.637164 | -3.456369 |
| H | 2.811818 | -2.475235 | -3.641893 |
| H | 1.361925 | -1.633705 | -4.237714 |
| H | 2.693118 | -0.701519 | -3.528352 |

15a

B3LYP SCF energy: -939.08995901 a.u.  
 B3LYP enthalpy: -938.697084 a.u.  
 B3LYP free energy: -938.776349 a.u.  
 M06 SCF energy in solution: -939.94081178 a.u.  
 M06 enthalpy in solution: -939.547937 a.u.  
 M06 free energy in solution: -939.627202 a.u.  
 Three lowest frequencies (cm-1): 12.9758 31.9993 45.9156

Cartesian coordinates

| ATOM | X         | Y         | Z         |
|------|-----------|-----------|-----------|
| C    | 1.185883  | -1.457014 | 0.903209  |
| C    | 1.591924  | -1.638353 | -0.449053 |
| C    | 2.635942  | -0.651031 | -0.753580 |
| C    | 2.862113  | 0.136549  | 0.405824  |
| C    | 1.935004  | -0.315885 | 1.429980  |
| C    | 0.188745  | -2.283667 | 1.653196  |
| H    | -0.657588 | -2.564263 | 1.019841  |
| H    | 0.663181  | -3.206314 | 2.012162  |
| H    | -0.204920 | -1.752223 | 2.522383  |
| C    | 1.114556  | -2.702460 | -1.386048 |
| H    | 1.066238  | -2.345586 | -2.418746 |
| H    | 1.811993  | -3.551084 | -1.366021 |
| H    | 0.128394  | -3.077698 | -1.102735 |
| C    | 3.846989  | 1.254207  | 0.562374  |
| H    | 3.446590  | 2.060307  | 1.183050  |

|    |           |           |           |
|----|-----------|-----------|-----------|
| H  | 4.760152  | 0.883282  | 1.045806  |
| H  | 4.129875  | 1.682865  | -0.401546 |
| Rh | 0.722842  | 0.373971  | -0.201389 |
| C  | -3.466584 | 0.588589  | 0.784477  |
| C  | -2.498689 | 0.148618  | -0.132560 |
| C  | -2.737785 | -1.007729 | -0.891041 |
| C  | -3.937668 | -1.702695 | -0.747562 |
| C  | -4.906634 | -1.254740 | 0.154490  |
| C  | -4.667046 | -0.109103 | 0.916844  |
| H  | -4.120939 | -2.589108 | -1.347872 |
| H  | -5.841501 | -1.795805 | 0.263338  |
| H  | -5.413277 | 0.240753  | 1.624079  |
| N  | -1.265289 | 0.822439  | -0.270350 |
| C  | -1.053645 | 2.127098  | -0.476267 |
| O  | 0.191673  | 2.451921  | -0.419742 |
| C  | -2.089211 | 3.163109  | -0.779005 |
| H  | -2.256272 | 3.780230  | 0.112249  |
| H  | -1.705411 | 3.823028  | -1.562356 |
| H  | -3.038677 | 2.720327  | -1.084363 |
| C  | 1.858089  | 0.213156  | 2.823403  |
| H  | 0.875793  | 0.044098  | 3.270586  |
| H  | 2.602223  | -0.301072 | 3.448522  |
| H  | 2.077855  | 1.282997  | 2.861471  |
| C  | 3.331956  | -0.530202 | -2.070527 |
| H  | 2.650902  | -0.713559 | -2.906774 |
| H  | 3.783001  | 0.455297  | -2.204555 |
| H  | 4.134904  | -1.277571 | -2.134285 |
| H  | -1.988877 | -1.334710 | -1.607462 |
| H  | -3.271544 | 1.464006  | 1.397188  |

15b

B3LYP SCF energy: -1394.82292564 a.u.  
 B3LYP enthalpy: -1394.334552 a.u.  
 B3LYP free energy: -1394.434760 a.u.  
 M06 SCF energy in solution: -1395.62694427 a.u.  
 M06 enthalpy in solution: -1395.138571 a.u.  
 M06 free energy in solution: -1395.238779 a.u.  
 Three lowest frequencies (cm-1): 14.8718 20.3195 23.6144

Cartesian coordinates

| ATOM | X         | Y        | Z         |
|------|-----------|----------|-----------|
| C    | 0.078897  | 1.237029 | 1.405476  |
| C    | 1.431655  | 0.746940 | 1.697770  |
| C    | 2.204810  | 0.852767 | 0.495609  |
| C    | 1.361240  | 1.366481 | -0.555339 |
| C    | 0.050785  | 1.615249 | 0.023039  |
| C    | -1.031942 | 1.346308 | 2.396855  |
| H    | -0.916896 | 0.623021 | 3.206730  |
| H    | -1.022566 | 2.352956 | 2.835445  |

|    |           |           |           |
|----|-----------|-----------|-----------|
| H  | -2.004784 | 1.206005  | 1.923890  |
| C  | 1.909281  | 0.271449  | 3.028458  |
| H  | 2.688086  | -0.484804 | 2.927104  |
| H  | 2.356610  | 1.117787  | 3.567080  |
| H  | 1.089279  | -0.122742 | 3.632735  |
| C  | 1.751448  | 1.647443  | -1.966972 |
| H  | 2.212166  | 2.646089  | -2.003165 |
| H  | 2.495850  | 0.933977  | -2.319693 |
| H  | 0.876812  | 1.655957  | -2.616988 |
| Rh | 0.470658  | -0.533746 | 0.191103  |
| C  | 3.654476  | 0.473362  | 0.430730  |
| O  | 4.370020  | 0.528370  | 1.408052  |
| O  | 4.035449  | 0.083181  | -0.787148 |
| C  | 5.443509  | -0.297760 | -0.928887 |
| H  | 6.054342  | 0.562369  | -0.641542 |
| H  | 5.641705  | -1.108906 | -0.223518 |
| C  | 5.661653  | -0.713475 | -2.368706 |
| H  | 6.706434  | -1.011973 | -2.502932 |
| H  | 5.027141  | -1.564586 | -2.635218 |
| H  | 5.453761  | 0.111742  | -3.057170 |
| C  | -1.108870 | 2.178710  | -0.744479 |
| O  | -1.290800 | 1.969656  | -1.926817 |
| O  | -1.881469 | 2.937459  | 0.032777  |
| C  | -3.048480 | 3.547320  | -0.611055 |
| H  | -3.682530 | 2.738094  | -0.983991 |
| H  | -2.693369 | 4.126612  | -1.467154 |
| C  | -3.744631 | 4.405140  | 0.424758  |
| H  | -3.082011 | 5.193176  | 0.795334  |
| H  | -4.619031 | 4.881166  | -0.030778 |
| H  | -4.087508 | 3.805227  | 1.273561  |
| C  | -3.369455 | -2.419744 | 0.594615  |
| C  | -2.472221 | -1.766133 | -0.265925 |
| C  | -2.959407 | -1.013216 | -1.345309 |
| C  | -4.332962 | -0.937695 | -1.571159 |
| C  | -5.226401 | -1.603444 | -0.726825 |
| C  | -4.740863 | -2.342780 | 0.354597  |
| H  | -2.991967 | -2.974008 | 1.449220  |
| H  | -2.262273 | -0.502981 | -2.002739 |
| H  | -4.704719 | -0.366039 | -2.416549 |
| H  | -6.295076 | -1.545683 | -0.909754 |
| H  | -5.430023 | -2.856462 | 1.018332  |
| N  | -1.079950 | -1.826114 | -0.032414 |
| C  | -0.313379 | -2.904147 | 0.147906  |
| O  | 0.896187  | -2.601866 | 0.484224  |
| C  | -0.713023 | -4.332461 | -0.031485 |
| H  | -0.804006 | -4.808890 | 0.952291  |
| H  | -1.660707 | -4.430588 | -0.563151 |
| H  | 0.083507  | -4.853606 | -0.570860 |



16a  
 B3LYP SCF energy: -1167.77870199 a.u.  
 B3LYP enthalpy: -1167.328620 a.u.  
 B3LYP free energy: -1167.417862 a.u.  
 M06 SCF energy in solution: -1168.56684277 a.u.  
 M06 enthalpy in solution: -1168.116761 a.u.  
 M06 free energy in solution: -1168.206003 a.u.  
 Three lowest frequencies (cm-1): 21.1877 41.0315 48.6257

Cartesian coordinates

| ATOM | X         | Y         | Z         |
|------|-----------|-----------|-----------|
| C    | 0.464829  | -2.049543 | -0.302968 |
| C    | 1.718141  | -1.683397 | -0.963022 |
| C    | 2.584253  | -1.122342 | 0.005111  |
| C    | 1.883980  | -1.134513 | 1.289187  |
| C    | 0.612124  | -1.772433 | 1.101287  |
| C    | -0.680046 | -2.767054 | -0.951065 |
| H    | -0.798135 | -2.468191 | -1.995884 |
| H    | -0.510703 | -3.852940 | -0.928213 |
| H    | -1.624363 | -2.556854 | -0.443435 |
| C    | 1.975079  | -1.851769 | -2.428978 |
| H    | 2.882733  | -1.332421 | -2.744578 |
| H    | 2.088070  | -2.915504 | -2.676181 |
| H    | 1.141896  | -1.458282 | -3.019510 |
| C    | 2.499442  | -0.713520 | 2.588611  |
| H    | 1.747316  | -0.571477 | 3.367590  |
| H    | 3.202273  | -1.482573 | 2.938303  |
| H    | 3.057471  | 0.221763  | 2.483337  |
| Rh   | 0.701474  | 0.114799  | -0.070135 |
| C    | -3.262357 | -0.334324 | 0.781963  |
| C    | -2.274628 | 0.324394  | 0.018548  |
| C    | -2.430144 | 0.350725  | -1.379253 |
| C    | -3.515803 | -0.277297 | -1.992286 |
| C    | -4.479766 | -0.938130 | -1.229023 |
| C    | -4.346458 | -0.954954 | 0.162558  |
| H    | -3.611637 | -0.237687 | -3.075112 |
| H    | -5.328346 | -1.420485 | -1.707093 |
| H    | -5.097353 | -1.449320 | 0.774754  |
| N    | -1.126356 | 0.911637  | 0.615882  |
| C    | -1.299781 | 1.674088  | 1.749463  |
| O    | -2.408783 | 1.998516  | 2.181425  |
| C    | -0.048659 | 2.124468  | 2.493375  |
| H    | 0.761253  | 2.414417  | 1.822981  |
| H    | -0.326371 | 2.963012  | 3.136219  |
| H    | 0.311583  | 1.313795  | 3.140260  |
| C    | -0.386895 | -2.103128 | 2.165733  |
| H    | -1.409768 | -1.995557 | 1.796937  |
| H    | -0.251887 | -3.142641 | 2.494063  |
| H    | -0.276190 | -1.457801 | 3.040661  |
| C    | 3.969761  | -0.585752 | -0.195991 |
| H    | 4.227332  | -0.519179 | -1.255786 |

|   |           |           |           |
|---|-----------|-----------|-----------|
| H | 4.069565  | 0.415964  | 0.234492  |
| H | 4.710452  | -1.234958 | 0.289282  |
| H | -3.192346 | -0.317982 | 1.862829  |
| C | 1.187131  | 3.649806  | -2.032584 |
| H | 1.196380  | 3.527154  | -3.118287 |
| H | 0.309510  | 4.249364  | -1.762908 |
| H | 2.080906  | 4.182473  | -1.699014 |
| C | 1.083646  | 2.310502  | -1.350476 |
| O | 1.567587  | 2.139579  | -0.184914 |
| O | 0.481788  | 1.340751  | -1.911315 |
| H | -1.689299 | 0.872772  | -1.973536 |

16b

B3LYP SCF energy: -1623.51452273 a.u.  
 B3LYP enthalpy: -1622.968523 a.u.  
 B3LYP free energy: -1623.077624 a.u.  
 M06 SCF energy in solution: -1624.25414725 a.u.  
 M06 enthalpy in solution: -1623.708148 a.u.  
 M06 free energy in solution: -1623.817249 a.u.  
 Three lowest frequencies (cm<sup>-1</sup>): 17.1515 22.2107 27.1222

Cartesian coordinates

| ATOM | X         | Y         | Z         |
|------|-----------|-----------|-----------|
| C    | 0.161347  | -2.331652 | -0.816722 |
| C    | -1.223193 | -2.309170 | -0.546915 |
| C    | -1.744667 | -1.009895 | -0.995413 |
| C    | -0.680100 | -0.272740 | -1.628803 |
| C    | 0.512527  | -1.050052 | -1.438649 |
| C    | 1.121445  | -3.445149 | -0.522525 |
| H    | 0.614053  | -4.294989 | -0.061791 |
| H    | 1.594287  | -3.789765 | -1.449390 |
| H    | 1.919335  | -3.107510 | 0.142732  |
| C    | -2.023669 | -3.392226 | 0.112283  |
| H    | -2.613687 | -2.993471 | 0.940220  |
| H    | -2.731836 | -3.828975 | -0.599348 |
| H    | -1.373942 | -4.183159 | 0.493775  |
| C    | -0.750040 | 1.038385  | -2.346968 |
| H    | -0.847650 | 0.845596  | -3.423005 |
| H    | -1.604483 | 1.625337  | -2.018525 |
| H    | 0.171030  | 1.604255  | -2.206338 |
| Rh   | -0.249243 | -0.569554 | 0.573388  |
| C    | -3.204219 | -0.700738 | -0.958928 |
| O    | -4.044691 | -1.510493 | -0.619257 |
| O    | -3.500301 | 0.548366  | -1.358518 |
| C    | -4.909769 | 0.900863  | -1.341116 |
| H    | -5.446017 | 0.208238  | -1.996741 |
| H    | -5.286289 | 0.760690  | -0.323772 |
| C    | -5.025664 | 2.340494  | -1.803205 |
| H    | -6.079254 | 2.640151  | -1.803695 |

|   |           |           |           |
|---|-----------|-----------|-----------|
| H | -4.478122 | 3.013346  | -1.135788 |
| H | -4.634328 | 2.461849  | -2.818435 |
| C | 1.839860  | -0.668835 | -2.005284 |
| O | 1.970863  | 0.062395  | -2.965586 |
| O | 2.859062  | -1.245610 | -1.349294 |
| C | 4.187980  | -0.896643 | -1.818712 |
| H | 4.296563  | 0.188918  | -1.750250 |
| H | 4.271534  | -1.184246 | -2.871475 |
| C | 5.183754  | -1.628006 | -0.939717 |
| H | 5.051611  | -2.712880 | -1.008497 |
| H | 6.203395  | -1.385557 | -1.258366 |
| H | 5.068502  | -1.329199 | 0.106887  |
| C | 2.500552  | 1.454999  | 1.015503  |
| C | 1.273003  | 2.009078  | 0.612895  |
| C | 1.299055  | 3.115225  | -0.262286 |
| C | 2.507077  | 3.639400  | -0.714716 |
| C | 3.722470  | 3.076976  | -0.313054 |
| C | 3.708616  | 1.983972  | 0.554886  |
| H | 0.364213  | 3.579446  | -0.552838 |
| H | 2.499090  | 4.496656  | -1.383378 |
| H | 4.663579  | 3.493488  | -0.662575 |
| H | 4.644823  | 1.546469  | 0.895400  |
| N | 0.043962  | 1.449459  | 1.062304  |
| C | -0.923129 | 2.311444  | 1.538146  |
| O | -0.697598 | 3.503002  | 1.756820  |
| C | -2.314838 | 1.749530  | 1.791004  |
| H | -2.790042 | 1.483390  | 0.840697  |
| H | -2.294962 | 0.857608  | 2.419656  |
| H | -2.905669 | 2.531524  | 2.272653  |
| C | 0.425450  | -1.269495 | 4.486402  |
| H | 1.324437  | -1.868257 | 4.651068  |
| H | 0.582232  | -0.281944 | 4.936479  |
| H | -0.439085 | -1.733183 | 4.967215  |
| C | 0.176010  | -1.092513 | 3.015864  |
| O | 1.136378  | -1.071206 | 2.179786  |
| O | -1.005046 | -0.923070 | 2.565775  |
| H | 2.496402  | 0.613326  | 1.697192  |

17a

B3LYP SCF energy: -938.64676783 a.u.

B3LYP enthalpy: -938.266622 a.u.

B3LYP free energy: -938.343769 a.u.

M06 SCF energy in solution: -939.45919728 a.u.

M06 enthalpy in solution: -939.079051 a.u.

M06 free energy in solution: -939.156198 a.u.

Three lowest frequencies (cm<sup>-1</sup>): 22.7965 31.2955 70.4410

Cartesian coordinates

| ATOM | X | Y | Z |
|------|---|---|---|
|------|---|---|---|

|    |           |           |           |
|----|-----------|-----------|-----------|
| C  | 1.760930  | -1.593548 | 0.260923  |
| C  | 2.055592  | -0.941528 | -0.970519 |
| C  | 2.463156  | 0.447760  | -0.686538 |
| C  | 2.313375  | 0.668995  | 0.683231  |
| C  | 1.780683  | -0.570828 | 1.278458  |
| C  | 1.470569  | -3.050449 | 0.469592  |
| H  | 1.041730  | -3.506181 | -0.427007 |
| H  | 2.390964  | -3.597340 | 0.715613  |
| H  | 0.761924  | -3.203695 | 1.287855  |
| C  | 2.127257  | -1.576553 | -2.325865 |
| H  | 1.758232  | -0.900678 | -3.103462 |
| H  | 3.167040  | -1.831074 | -2.576060 |
| H  | 1.537023  | -2.495012 | -2.372220 |
| C  | 2.608465  | 1.917593  | 1.457652  |
| H  | 1.819832  | 2.131581  | 2.185863  |
| H  | 3.549189  | 1.813638  | 2.015717  |
| H  | 2.702867  | 2.788619  | 0.804469  |
| Rh | 0.225101  | -0.053168 | -0.108431 |
| C  | -3.736648 | 0.100071  | -0.107068 |
| C  | -2.347538 | 0.142787  | -0.082168 |
| C  | -1.567722 | -1.026556 | -0.030653 |
| C  | -2.159848 | -2.276157 | 0.000558  |
| C  | -3.570703 | -2.344412 | -0.017863 |
| C  | -4.331468 | -1.178627 | -0.069421 |
| H  | -1.574927 | -3.193136 | 0.041007  |
| H  | -4.064308 | -3.313052 | 0.012220  |
| H  | -5.416713 | -1.251332 | -0.079723 |
| N  | -1.391731 | 1.203539  | -0.111142 |
| C  | -1.725518 | 2.528175  | -0.078288 |
| O  | -2.888349 | 2.938775  | -0.062969 |
| C  | -0.553131 | 3.500473  | -0.042964 |
| H  | -0.898910 | 4.485003  | -0.365833 |
| H  | -0.172122 | 3.590440  | 0.982338  |
| H  | 0.272503  | 3.168475  | -0.680153 |
| C  | 1.554826  | -0.781042 | 2.743964  |
| H  | 0.864027  | -1.607652 | 2.927021  |
| H  | 2.504717  | -1.015342 | 3.246116  |
| H  | 1.140490  | 0.113893  | 3.216689  |
| C  | 2.935502  | 1.413769  | -1.730699 |
| H  | 2.284656  | 1.400479  | -2.611432 |
| H  | 2.963118  | 2.438549  | -1.351604 |
| H  | 3.947824  | 1.155818  | -2.070863 |
| H  | -4.326466 | 1.006051  | -0.149378 |

17b

B3LYP SCF energy: -1394.39065058 a.u.  
 B3LYP enthalpy: -1393.914818 a.u.  
 B3LYP free energy: -1394.013760 a.u.  
 M06 SCF energy in solution: -1395.15586390 a.u.

M06 enthalpy in solution: -1394.680031 a.u.  
 M06 free energy in solution: -1394.778973 a.u.  
 Three lowest frequencies (cm-1): 14.6490 20.7494 29.2253

Cartesian coordinates

| ATOM | X         | Y         | Z         |
|------|-----------|-----------|-----------|
| C    | 0.676089  | 1.176299  | -1.428549 |
| C    | -0.671048 | 0.699951  | -1.716143 |
| C    | -1.563429 | 1.196059  | -0.682273 |
| C    | -0.768555 | 1.849411  | 0.299133  |
| C    | 0.615127  | 1.856621  | -0.170618 |
| C    | 1.827369  | 1.059014  | -2.382136 |
| H    | 1.812409  | 0.096224  | -2.898491 |
| H    | 1.754714  | 1.848302  | -3.143399 |
| H    | 2.780899  | 1.163982  | -1.869898 |
| C    | -1.065218 | 0.000590  | -2.979552 |
| H    | -1.875829 | -0.707077 | -2.810277 |
| H    | -1.436103 | 0.738948  | -3.703047 |
| H    | -0.213390 | -0.519188 | -3.423509 |
| C    | -1.217897 | 2.452295  | 1.593722  |
| H    | -1.239164 | 3.544763  | 1.495694  |
| H    | -2.207183 | 2.097528  | 1.871015  |
| H    | -0.499555 | 2.237927  | 2.387652  |
| Rh   | 0.107028  | -0.331688 | 0.039842  |
| C    | -3.026844 | 0.971150  | -0.730109 |
| O    | -3.614677 | 0.614599  | -1.735677 |
| O    | -3.655836 | 1.204093  | 0.440827  |
| C    | -5.094528 | 1.019644  | 0.429894  |
| H    | -5.526025 | 1.692568  | -0.317565 |
| H    | -5.310646 | -0.006656 | 0.119582  |
| C    | -5.603270 | 1.313102  | 1.828402  |
| H    | -6.690328 | 1.181791  | 1.858717  |
| H    | -5.155650 | 0.632667  | 2.559990  |
| H    | -5.374020 | 2.341945  | 2.124583  |
| C    | 1.700365  | 2.565263  | 0.557319  |
| O    | 1.499243  | 3.380712  | 1.437571  |
| O    | 2.937179  | 2.227523  | 0.138390  |
| C    | 4.030428  | 2.906639  | 0.807428  |
| H    | 3.970006  | 2.689623  | 1.877969  |
| H    | 3.901578  | 3.985682  | 0.678224  |
| C    | 5.325570  | 2.407342  | 0.196018  |
| H    | 5.366514  | 2.625394  | -0.876209 |
| H    | 6.174173  | 2.904043  | 0.678788  |
| H    | 5.436535  | 1.327383  | 0.336804  |
| C    | 1.735411  | -1.548978 | 0.130180  |
| C    | 1.003807  | -2.718661 | 0.385790  |
| C    | 1.630563  | -3.933702 | 0.633281  |
| C    | 3.041194  | -3.931508 | 0.599175  |
| C    | 3.773560  | -2.773504 | 0.345870  |
| C    | 3.115939  | -1.545762 | 0.106436  |
| H    | 1.062469  | -4.832024 | 0.835743  |

|   |           |           |           |
|---|-----------|-----------|-----------|
| H | 3.569119  | -4.865941 | 0.774326  |
| H | 4.859987  | -2.814372 | 0.324867  |
| H | 3.687360  | -0.642224 | -0.090533 |
| N | -0.353234 | -2.284598 | 0.342942  |
| C | -1.432674 | -3.130722 | 0.358204  |
| O | -1.317400 | -4.347232 | 0.508478  |
| C | -2.793894 | -2.473323 | 0.194769  |
| H | -2.885007 | -1.577677 | 0.818155  |
| H | -2.957033 | -2.171552 | -0.847115 |
| H | -3.565918 | -3.194810 | 0.470288  |

18a

B3LYP SCF energy: -727.91469317 a.u.  
 B3LYP enthalpy: -727.619773 a.u.  
 B3LYP free energy: -727.689422 a.u.  
 M06 SCF energy in solution: -728.87749932 a.u.  
 M06 enthalpy in solution: -728.582579 a.u.  
 M06 free energy in solution: -728.652228 a.u.  
 Three lowest frequencies (cm-1): 18.5488 33.4139 36.0523

Cartesian coordinates

| ATOM | X         | Y         | Z         |
|------|-----------|-----------|-----------|
| C    | 1.355149  | -1.182101 | 0.544432  |
| C    | 1.624556  | -0.740143 | -0.781216 |
| C    | 1.625941  | 0.730406  | -0.787762 |
| C    | 1.357726  | 1.185090  | 0.533930  |
| C    | 1.138347  | 0.005650  | 1.363258  |
| O    | -2.165155 | -1.092126 | -0.145823 |
| O    | -2.164880 | 1.093802  | -0.145822 |
| C    | -2.839708 | 0.001128  | -0.192028 |
| C    | -4.328719 | 0.000292  | -0.268571 |
| H    | -4.731918 | -0.051064 | 0.750880  |
| H    | -4.686612 | 0.921402  | -0.733404 |
| H    | -4.679370 | -0.878373 | -0.815018 |
| Rh   | -0.362620 | -0.000045 | -0.167736 |
| C    | 1.897643  | 1.578879  | -1.987040 |
| H    | 2.983101  | 1.680622  | -2.124656 |
| H    | 1.494141  | 1.133354  | -2.900432 |
| H    | 1.479882  | 2.582194  | -1.879646 |
| C    | 1.294386  | 2.603164  | 1.006281  |
| H    | 0.530622  | 2.738854  | 1.776455  |
| H    | 2.260901  | 2.892176  | 1.439946  |
| H    | 1.075054  | 3.292941  | 0.188522  |
| C    | 1.288221  | -2.595465 | 1.030097  |
| H    | 1.069388  | -3.292669 | 0.218539  |
| H    | 2.253212  | -2.882034 | 1.468756  |
| H    | 0.522458  | -2.722370 | 1.799792  |
| C    | 0.860928  | 0.012476  | 2.828325  |
| H    | 0.305318  | -0.874133 | 3.142781  |

|   |          |           |           |
|---|----------|-----------|-----------|
| H | 1.817310 | 0.014394  | 3.371670  |
| H | 0.306363 | 0.902577  | 3.134659  |
| C | 1.894405 | -1.599752 | -1.973030 |
| H | 1.479028 | -1.168491 | -2.888050 |
| H | 2.979509 | -1.693144 | -2.118812 |
| H | 1.486547 | -2.605368 | -1.850775 |

18b

B3LYP SCF energy: -1183.64354991 a.u.  
 B3LYP enthalpy: -1183.253351 a.u.  
 B3LYP free energy: -1183.344786 a.u.  
 M06 SCF energy in solution: -1184.55904245 a.u.  
 M06 enthalpy in solution: -1184.168844 a.u.  
 M06 free energy in solution: -1184.260279 a.u.  
 Three lowest frequencies (cm-1): 17.9559 18.5443 23.5005

Cartesian coordinates

| ATOM | X         | Y         | Z         |
|------|-----------|-----------|-----------|
| C    | 0.229905  | -1.286909 | -0.858781 |
| C    | 1.363502  | -0.799281 | -0.090994 |
| C    | 0.925336  | -0.494923 | 1.233908  |
| C    | -0.519214 | -0.774153 | 1.299333  |
| C    | -0.920860 | -1.274532 | 0.011652  |
| O    | 0.511827  | 2.774485  | -0.170722 |
| O    | -1.613862 | 2.296371  | -0.252284 |
| C    | -0.695293 | 3.194988  | -0.304241 |
| C    | -1.008496 | 4.632380  | -0.537313 |
| H    | -0.978344 | 4.831268  | -1.616065 |
| H    | -2.011364 | 4.864900  | -0.172329 |
| H    | -0.259100 | 5.263976  | -0.054423 |
| Rh   | -0.163720 | 0.789053  | -0.161883 |
| C    | 2.738436  | -0.604676 | -0.669274 |
| O    | 2.921213  | -0.277743 | -1.822285 |
| C    | -2.273965 | -1.761290 | -0.427103 |
| O    | -2.391828 | -2.590712 | -1.302658 |
| C    | 1.753026  | 0.006517  | 2.369521  |
| H    | 2.159386  | -0.854507 | 2.917712  |
| H    | 2.598753  | 0.597685  | 2.017542  |
| H    | 1.160296  | 0.601156  | 3.067932  |
| C    | -1.354117 | -0.642983 | 2.527757  |
| H    | -2.403193 | -0.491657 | 2.278536  |
| H    | -1.269904 | -1.573334 | 3.108455  |
| H    | -1.006437 | 0.173133  | 3.165554  |
| C    | 0.251396  | -1.708057 | -2.285792 |
| H    | 1.098314  | -1.267589 | -2.810945 |
| H    | 0.342189  | -2.803521 | -2.315244 |
| H    | -0.690181 | -1.470877 | -2.784859 |
| O    | -3.269791 | -1.185906 | 0.243973  |
| O    | 3.683248  | -0.852525 | 0.234782  |

|   |           |           |           |
|---|-----------|-----------|-----------|
| C | -4.627062 | -1.605080 | -0.127639 |
| H | -4.747671 | -1.423086 | -1.198505 |
| H | -4.703150 | -2.681389 | 0.048618  |
| C | -5.598248 | -0.803012 | 0.712378  |
| H | -6.621627 | -1.086396 | 0.445876  |
| H | -5.459710 | -1.000468 | 1.780110  |
| H | -5.482974 | 0.270307  | 0.532684  |
| C | 5.072058  | -0.712278 | -0.224250 |
| H | 5.207186  | 0.318315  | -0.563208 |
| H | 5.205191  | -1.375696 | -1.082541 |
| C | 5.974042  | -1.071601 | 0.937386  |
| H | 7.018288  | -0.982380 | 0.620970  |
| H | 5.817922  | -0.398513 | 1.786177  |
| H | 5.804417  | -2.101138 | 1.266955  |

19a

B3LYP SCF energy: \$TAB\$ -1153.34349762 a.u.

B3LYP enthalpy: \$TAB\$ -1152.846341 a.u.

B3LYP free energy: \$TAB\$ -1152.938097 a.u.

M06 SCF energy in solution: \$TAB\$ -1154.15946845 a.u.

M06 enthalpy in solution: \$TAB\$ -1153.662312 a.u.

M06 free energy in solution: \$TAB\$ -1153.754068 a.u.

Three lowest frequencies (cm-1): 14.6897 22.8206 40.2997

Cartesian coordinates

| ATOM | X         | Y         | Z         |
|------|-----------|-----------|-----------|
| C    | 3.256558  | 0.434443  | 2.130797  |
| C    | 2.574334  | 0.821393  | 0.976100  |
| C    | 2.791095  | 0.161466  | -0.245066 |
| C    | 3.727617  | -0.880606 | -0.281043 |
| C    | 4.414020  | -1.267223 | 0.874129  |
| C    | 4.177165  | -0.616326 | 2.085160  |
| H    | 3.082090  | 0.966593  | 3.062097  |
| H    | 3.937661  | -1.399953 | -1.210409 |
| H    | 5.137871  | -2.075600 | 0.821729  |
| H    | 4.714723  | -0.913244 | 2.980983  |
| C    | 2.057900  | 0.636931  | -1.502843 |
| C    | -2.483012 | -0.946259 | 1.009561  |
| C    | -2.651671 | -1.272000 | -0.373985 |
| C    | -1.475663 | -2.029071 | -0.820592 |
| C    | -1.163527 | -1.396805 | 1.395892  |
| C    | -0.572796 | -2.122539 | 0.272214  |
| Rh   | -0.933312 | 0.043330  | -0.194221 |
| O    | 0.046903  | 3.246815  | -0.340433 |
| C    | -1.067302 | 3.075035  | 0.192617  |
| O    | -1.644531 | 1.915349  | 0.334558  |
| C    | -1.856004 | 4.249728  | 0.724238  |
| H    | -2.132397 | 4.077309  | 1.769105  |
| H    | -1.269123 | 5.164894  | 0.637331  |



|   |           |           |           |
|---|-----------|-----------|-----------|
| H | -2.784605 | 4.354621  | 0.152532  |
| H | 1.878239  | 1.654173  | 1.023270  |
| C | -3.853663 | -0.970086 | -1.208785 |
| H | -3.582335 | -0.759782 | -2.247127 |
| H | -4.526356 | -1.839120 | -1.213831 |
| H | -4.409931 | -0.115489 | -0.817223 |
| C | -1.332925 | -2.643840 | -2.175970 |
| H | -1.937584 | -3.559534 | -2.226770 |
| H | -1.689456 | -1.973695 | -2.963585 |
| H | -0.299305 | -2.914618 | -2.397457 |
| C | 0.709066  | -2.889687 | 0.336382  |
| H | 1.484013  | -2.353093 | 0.888966  |
| H | 0.529280  | -3.843329 | 0.851446  |
| H | 1.099678  | -3.119518 | -0.656770 |
| C | -0.538337 | -1.250712 | 2.743260  |
| H | -0.691660 | -2.174274 | 3.319480  |
| H | 0.539618  | -1.081905 | 2.665847  |
| H | -0.980493 | -0.425316 | 3.305458  |
| C | -3.455811 | -0.190032 | 1.861722  |
| H | -3.267303 | -0.362382 | 2.924074  |
| H | -3.375960 | 0.886802  | 1.668165  |
| H | -4.481470 | -0.503674 | 1.645969  |
| C | 2.693010  | 1.931404  | -2.039253 |
| H | 3.729948  | 1.738121  | -2.330200 |
| H | 2.145913  | 2.293705  | -2.915918 |
| H | 2.698465  | 2.716354  | -1.277320 |
| C | 1.966581  | -0.409177 | -2.612992 |
| H | 1.339302  | -0.022906 | -3.421403 |
| H | 2.952736  | -0.630057 | -3.030089 |
| H | 1.532995  | -1.344516 | -2.246594 |
| O | 0.670040  | 0.973129  | -1.142909 |
| H | 0.545375  | 1.971019  | -0.880777 |

19b

B3LYP SCF energy: \$TAB\$ -1609.07681621 a.u.

B3LYP enthalpy: \$TAB\$ -1608.483074 a.u.

B3LYP free energy: \$TAB\$ -1608.595402 a.u.

M06 SCF energy in solution: \$TAB\$ -1609.84079094 a.u.

M06 enthalpy in solution: \$TAB\$ -1609.247049 a.u.

M06 free energy in solution: \$TAB\$ -1609.359377 a.u.

Three lowest frequencies (cm-1): 15.3562 22.1719 24.9369

Cartesian coordinates

| ATOM | X        | Y         | Z         |
|------|----------|-----------|-----------|
| C    | 2.575930 | -0.364467 | -2.867350 |
| C    | 2.089570 | -1.180755 | -1.844072 |
| C    | 2.837538 | -1.383353 | -0.672513 |
| C    | 4.089865 | -0.763661 | -0.561046 |
| C    | 4.583933 | 0.036493  | -1.594091 |

|    |           |           |           |
|----|-----------|-----------|-----------|
| C  | 3.827364  | 0.244050  | -2.748781 |
| H  | 1.982226  | -0.222704 | -3.766374 |
| H  | 4.694694  | -0.901138 | 0.328303  |
| H  | 5.566093  | 0.490685  | -1.495083 |
| H  | 4.214924  | 0.862046  | -3.553828 |
| C  | 2.337418  | -2.344292 | 0.400402  |
| C  | -0.805765 | 1.620272  | 0.120671  |
| C  | -2.031026 | 1.078733  | 0.696601  |
| C  | -1.749739 | 0.614906  | 2.040285  |
| C  | 0.229196  | 1.394175  | 1.084710  |
| C  | -0.341808 | 0.757812  | 2.267201  |
| Rh | -0.669891 | -0.560861 | 0.499855  |
| O  | -1.203559 | -1.481385 | -1.430687 |
| C  | -1.803896 | -2.413843 | -0.815946 |
| O  | -1.842745 | -2.339624 | 0.469387  |
| C  | -2.421595 | -3.577950 | -1.530640 |
| H  | -3.355839 | -3.867826 | -1.042706 |
| H  | -2.596703 | -3.330030 | -2.579242 |
| H  | -1.739418 | -4.435124 | -1.482825 |
| H  | 1.121957  | -1.656338 | -1.958551 |
| C  | -2.742107 | 0.036624  | 2.993676  |
| H  | -3.453986 | -0.613659 | 2.480740  |
| H  | -2.250940 | -0.523211 | 3.791794  |
| H  | -3.323254 | 0.851802  | 3.441350  |
| C  | 0.352788  | 0.448248  | 3.557350  |
| H  | 1.430264  | 0.383541  | 3.422413  |
| H  | 0.147611  | 1.254087  | 4.275114  |
| H  | -0.017618 | -0.481814 | 3.997103  |
| C  | -0.659137 | 2.247921  | -1.227594 |
| H  | -0.667950 | 3.339475  | -1.114011 |
| H  | 0.295967  | 1.976836  | -1.680452 |
| H  | -1.478409 | 1.953955  | -1.881529 |
| C  | 1.667221  | 1.816437  | 0.995738  |
| O  | 2.552118  | 1.315059  | 1.659865  |
| C  | -3.429925 | 1.154706  | 0.153269  |
| O  | -4.381857 | 1.306187  | 0.888808  |
| O  | -3.487383 | 1.044718  | -1.174418 |
| O  | 1.824812  | 2.837800  | 0.155322  |
| C  | -4.822138 | 1.141957  | -1.768867 |
| H  | -5.439072 | 0.349231  | -1.337008 |
| H  | -5.252213 | 2.103912  | -1.477076 |
| C  | -4.664450 | 1.004012  | -3.268826 |
| H  | -5.650417 | 1.056010  | -3.742048 |
| H  | -4.047513 | 1.809729  | -3.678883 |
| H  | -4.207460 | 0.044845  | -3.531311 |
| C  | 3.182255  | 3.373102  | 0.030187  |
| H  | 3.824893  | 2.565892  | -0.329319 |
| H  | 3.518890  | 3.666069  | 1.028333  |
| C  | 3.122094  | 4.543419  | -0.929461 |
| H  | 4.122817  | 4.974992  | -1.035204 |
| H  | 2.781339  | 4.226439  | -1.920094 |

|   |          |           |           |
|---|----------|-----------|-----------|
| H | 2.451678 | 5.325372  | -0.559666 |
| O | 0.864845 | -2.148837 | 0.502301  |
| C | 2.527883 | -3.799791 | -0.056930 |
| H | 3.593096 | -4.008120 | -0.193940 |
| H | 2.145056 | -4.504034 | 0.693722  |
| H | 2.021672 | -3.978888 | -1.009776 |
| C | 2.939595 | -2.119938 | 1.788147  |
| H | 2.421461 | -2.748121 | 2.521997  |
| H | 3.994243 | -2.410422 | 1.806951  |
| H | 2.860889 | -1.072982 | 2.087997  |
| H | 0.479887 | -2.902020 | 0.982303  |

20a

|                                  |               |         |         |
|----------------------------------|---------------|---------|---------|
| B3LYP SCF energy:                | -924.22766979 | a.u.    |         |
| B3LYP enthalpy:                  | -923.799416   | a.u.    |         |
| B3LYP free energy:               | -923.877818   | a.u.    |         |
| M06 SCF energy in solution:      | -925.06512978 | a.u.    |         |
| M06 enthalpy in solution:        | -924.636876   | a.u.    |         |
| M06 free energy in solution:     | -924.715278   | a.u.    |         |
| Three lowest frequencies (cm-1): | 12.3652       | 26.4067 | 61.0379 |

Cartesian coordinates

| ATOM | X         | Y         | Z         |
|------|-----------|-----------|-----------|
| C    | 1.627010  | 2.154799  | -0.012201 |
| C    | 1.411503  | 0.765137  | 0.018567  |
| C    | 2.543280  | -0.090091 | 0.059334  |
| C    | 3.832558  | 0.458949  | 0.061923  |
| C    | 4.018870  | 1.838924  | 0.030167  |
| C    | 2.911740  | 2.691967  | -0.001462 |
| H    | 0.781997  | 2.834070  | -0.036469 |
| H    | 4.702782  | -0.191741 | 0.086152  |
| H    | 5.025074  | 2.247380  | 0.032097  |
| H    | 3.052437  | 3.769006  | -0.018292 |
| C    | 2.375955  | -1.596764 | 0.068711  |
| C    | -2.548845 | -0.917045 | -0.350892 |
| C    | -2.549704 | -0.329279 | 0.922648  |
| C    | -2.068490 | 1.063696  | 0.793980  |
| C    | -2.021896 | 0.070674  | -1.289800 |
| C    | -1.836405 | 1.329679  | -0.588771 |
| Rh   | -0.385992 | -0.149561 | 0.116437  |
| C    | -2.955210 | -0.952655 | 2.220936  |
| H    | -2.238657 | -0.723275 | 3.016302  |
| H    | -3.929260 | -0.558626 | 2.540655  |
| H    | -3.044843 | -2.038636 | 2.145338  |
| C    | -2.040402 | 2.052515  | 1.917171  |
| H    | -3.051326 | 2.446339  | 2.091557  |
| H    | -1.701495 | 1.594568  | 2.850607  |
| H    | -1.385461 | 2.898545  | 1.697623  |
| C    | -1.599304 | 2.658371  | -1.239990 |

|   |           |           |           |
|---|-----------|-----------|-----------|
| H | -0.841774 | 2.605647  | -2.026608 |
| H | -2.532652 | 3.010100  | -1.698993 |
| H | -1.289728 | 3.416977  | -0.517781 |
| C | -1.907328 | -0.118647 | -2.768094 |
| H | -2.875026 | 0.102819  | -3.240974 |
| H | -1.163863 | 0.552136  | -3.205471 |
| H | -1.644951 | -1.147263 | -3.029351 |
| C | -2.965536 | -2.310211 | -0.718848 |
| H | -3.964476 | -2.302469 | -1.173884 |
| H | -2.285414 | -2.759473 | -1.449984 |
| H | -3.009641 | -2.967238 | 0.153406  |
| C | 2.717901  | -2.219308 | -1.289993 |
| H | 3.777060  | -2.068589 | -1.517804 |
| H | 2.532846  | -3.301464 | -1.285185 |
| H | 2.130064  | -1.755241 | -2.088061 |
| C | 3.109731  | -2.285627 | 1.223407  |
| H | 2.893936  | -3.360527 | 1.229302  |
| H | 4.192227  | -2.168986 | 1.119296  |
| H | 2.806397  | -1.857046 | 2.182546  |
| O | 0.927856  | -1.802198 | 0.306721  |
| H | 0.677970  | -2.719657 | 0.109772  |

20b

B3LYP SCF energy: -1379.97416337 a.u.  
 B3LYP enthalpy: -1379.449914 a.u.  
 B3LYP free energy: -1379.546998 a.u.  
 M06 SCF energy in solution: -1380.75870940 a.u.  
 M06 enthalpy in solution: -1380.234460 a.u.  
 M06 free energy in solution: -1380.331544 a.u.  
 Three lowest frequencies (cm<sup>-1</sup>): 18.3925 21.9240 29.7872

Cartesian coordinates

| ATOM | X         | Y         | Z         |
|------|-----------|-----------|-----------|
| C    | 3.069191  | -0.458370 | -0.920147 |
| C    | 1.929657  | -1.097344 | -0.406921 |
| C    | 2.034281  | -2.397956 | 0.150664  |
| C    | 3.278800  | -3.037163 | 0.149999  |
| C    | 4.401575  | -2.402361 | -0.383090 |
| C    | 4.298963  | -1.115856 | -0.921079 |
| H    | 2.997570  | 0.545293  | -1.328653 |
| H    | 3.381875  | -4.033384 | 0.571411  |
| H    | 5.360265  | -2.912650 | -0.373384 |
| H    | 5.174914  | -0.626012 | -1.336587 |
| C    | 0.815031  | -3.045273 | 0.780057  |
| C    | -0.705378 | 1.202687  | 0.602941  |
| C    | 0.163133  | 1.792394  | -0.410292 |
| C    | -0.399558 | 1.501629  | -1.691493 |
| C    | -1.892160 | 0.701611  | -0.102461 |
| C    | -1.716856 | 0.877418  | -1.480047 |

|    |           |           |           |
|----|-----------|-----------|-----------|
| Rh | 0.071758  | -0.394335 | -0.571372 |
| C  | 0.112669  | 1.903820  | -3.038974 |
| H  | 1.170826  | 2.157113  | -3.001329 |
| H  | -0.049317 | 1.110833  | -3.775696 |
| H  | -0.441119 | 2.787288  | -3.386614 |
| C  | -2.640202 | 0.473579  | -2.585788 |
| H  | -3.483076 | -0.110632 | -2.214187 |
| H  | -3.042502 | 1.369657  | -3.076172 |
| H  | -2.117251 | -0.105809 | -3.353677 |
| C  | -0.583822 | 1.300971  | 2.090733  |
| H  | -0.992297 | 2.264956  | 2.422081  |
| H  | -1.147286 | 0.502125  | 2.576935  |
| H  | 0.458032  | 1.265765  | 2.409195  |
| C  | -2.941649 | -0.131328 | 0.563352  |
| O  | -2.666997 | -1.075636 | 1.295445  |
| C  | 1.407076  | 2.594755  | -0.196055 |
| O  | 2.253536  | 2.762924  | -1.052465 |
| O  | 1.451950  | 3.121295  | 1.030756  |
| O  | -4.170131 | 0.263520  | 0.268334  |
| C  | 2.619910  | 3.947481  | 1.335796  |
| H  | 3.514348  | 3.336250  | 1.187187  |
| H  | 2.646799  | 4.769692  | 0.615662  |
| C  | 2.476512  | 4.432099  | 2.763954  |
| H  | 3.333136  | 5.064737  | 3.018216  |
| H  | 1.565357  | 5.024808  | 2.890970  |
| H  | 2.452191  | 3.594122  | 3.467842  |
| C  | -5.278592 | -0.497273 | 0.859738  |
| H  | -5.165737 | -0.455982 | 1.946102  |
| H  | -5.176048 | -1.538573 | 0.542394  |
| C  | -6.567911 | 0.136732  | 0.382107  |
| H  | -7.415859 | -0.406026 | 0.812259  |
| H  | -6.634668 | 1.182105  | 0.697821  |
| H  | -6.652033 | 0.092750  | -0.708050 |
| O  | -0.331163 | -2.281627 | 0.225914  |
| C  | 0.599143  | -4.501747 | 0.362572  |
| H  | 1.405824  | -5.137114 | 0.740133  |
| H  | -0.342730 | -4.877719 | 0.775500  |
| H  | 0.567754  | -4.590421 | -0.726770 |
| C  | 0.809385  | -2.873162 | 2.303488  |
| H  | -0.108926 | -3.283432 | 2.741297  |
| H  | 1.656572  | -3.408279 | 2.742331  |
| H  | 0.898906  | -1.816863 | 2.576757  |
| H  | -1.077362 | -2.187356 | 0.860553  |

TS1a

B3LYP SCF energy: -1168.18124331 a.u.  
 B3LYP enthalpy: -1167.722871 a.u.  
 B3LYP free energy: -1167.810727 a.u.  
 M06 SCF energy in solution: -1169.00307941 a.u.

M06 enthalpy in solution: -1168.544707 a.u.  
M06 free energy in solution: -1168.632563 a.u.  
Three lowest frequencies (cm-1): -1038.5922 26.5948 30.4564  
Imaginary frequency: -1038.5922 cm-1

Cartesian coordinates

| ATOM | X         | Y         | Z         |
|------|-----------|-----------|-----------|
| C    | -2.286581 | -0.433138 | 1.257572  |
| C    | -2.699349 | -0.410251 | -0.104758 |
| C    | -1.891136 | -1.373893 | -0.837325 |
| C    | -1.062836 | -2.076191 | 0.122994  |
| C    | -1.254085 | -1.459629 | 1.396965  |
| C    | -2.802501 | 0.408509  | 2.383022  |
| H    | -3.436594 | 1.221404  | 2.023699  |
| H    | -3.393467 | -0.203197 | 3.076616  |
| H    | -1.978438 | 0.853319  | 2.950356  |
| C    | -3.725586 | 0.479224  | -0.731952 |
| H    | -3.268703 | 1.115188  | -1.497523 |
| H    | -4.505304 | -0.125365 | -1.210537 |
| H    | -4.204028 | 1.129215  | 0.003088  |
| C    | -0.218244 | -3.281689 | -0.147806 |
| H    | -0.791406 | -4.184357 | 0.103181  |
| H    | 0.070797  | -3.352411 | -1.197304 |
| H    | 0.693170  | -3.288861 | 0.455429  |
| Rh   | -0.516918 | 0.101252  | 0.005878  |
| C    | 3.609704  | -1.212850 | 0.155407  |
| C    | 2.560333  | -0.291390 | 0.250170  |
| C    | 1.561387  | -0.197234 | -0.751229 |
| C    | 1.710222  | -1.050133 | -1.871063 |
| C    | 2.754649  | -1.961978 | -1.984175 |
| C    | 3.699437  | -2.049563 | -0.955579 |
| H    | 4.363718  | -1.268364 | 0.937689  |
| H    | 0.996695  | -0.957891 | -2.686239 |
| H    | 2.848024  | -2.589659 | -2.865355 |
| H    | 4.522054  | -2.755017 | -1.026366 |
| N    | 2.604547  | 0.605815  | 1.348068  |
| H    | 3.508398  | 0.685594  | 1.797059  |
| C    | 1.635568  | 1.410594  | 1.842883  |
| O    | 0.447257  | 1.401304  | 1.462363  |
| C    | 2.049279  | 2.383262  | 2.920602  |
| H    | 1.278574  | 2.412634  | 3.694286  |
| H    | 3.013423  | 2.139039  | 3.374782  |
| H    | 2.115500  | 3.385056  | 2.480720  |
| H    | 1.347736  | 1.047131  | -1.094642 |
| C    | -0.314223 | 3.871519  | -2.303400 |
| H    | -0.133068 | 3.748667  | -3.377157 |
| H    | -1.364450 | 4.115683  | -2.139001 |
| H    | 0.326047  | 4.686597  | -1.955506 |
| C    | 0.061523  | 2.590983  | -1.594596 |
| O    | -0.876120 | 1.856645  | -1.144883 |
| O    | 1.291981  | 2.294908  | -1.501152 |

|   |           |           |           |
|---|-----------|-----------|-----------|
| C | -2.089472 | -1.731438 | -2.279000 |
| H | -2.927728 | -2.433655 | -2.382669 |
| H | -2.322674 | -0.847735 | -2.879361 |
| H | -1.205419 | -2.211051 | -2.705825 |
| C | -0.630565 | -1.876080 | 2.693711  |
| H | -1.288875 | -2.580672 | 3.219458  |
| H | 0.330164  | -2.373699 | 2.539679  |
| H | -0.474739 | -1.019282 | 3.355179  |

TS1b

B3LYP SCF energy: -1623.91782578 a.u.  
 B3LYP enthalpy: -1623.364040 a.u.  
 B3LYP free energy: -1623.474374 a.u.  
 M06 SCF energy in solution: -1624.69238627 a.u.  
 M06 enthalpy in solution: -1624.138600 a.u.  
 M06 free energy in solution: -1624.248934 a.u.  
 Three lowest frequencies (cm-1): -965.6026 16.3572 21.1209  
 Imaginary frequency: -965.6026 cm-1

Cartesian coordinates

| ATOM | X         | Y         | Z         |
|------|-----------|-----------|-----------|
| C    | 1.120810  | -1.262560 | 1.589677  |
| C    | -0.257647 | -1.292615 | 1.968674  |
| C    | -1.046922 | -1.423401 | 0.758705  |
| C    | -0.149634 | -1.566408 | -0.377543 |
| C    | 1.171356  | -1.412935 | 0.144773  |
| C    | 2.288894  | -1.136850 | 2.518455  |
| H    | 1.986153  | -0.688733 | 3.467746  |
| H    | 2.718371  | -2.124894 | 2.723880  |
| H    | 3.079135  | -0.519982 | 2.082527  |
| C    | -0.773381 | -1.154490 | 3.366193  |
| H    | -1.860355 | -1.225578 | 3.392377  |
| H    | -0.340091 | -1.935603 | 4.001568  |
| H    | -0.489871 | -0.180610 | 3.780176  |
| C    | -0.510457 | -1.890419 | -1.793697 |
| H    | -0.703265 | -2.967008 | -1.875057 |
| H    | -1.420866 | -1.375328 | -2.102958 |
| H    | 0.303001  | -1.623977 | -2.469659 |
| Rh   | 0.063793  | 0.458030  | 0.585492  |
| C    | -2.536105 | -1.564640 | 0.754874  |
| O    | -3.273426 | -0.964302 | 1.510534  |
| O    | -2.937727 | -2.454287 | -0.160496 |
| C    | -4.374493 | -2.709864 | -0.223520 |
| H    | -4.706232 | -3.023826 | 0.769761  |
| H    | -4.877015 | -1.768308 | -0.464132 |
| C    | -4.603130 | -3.776149 | -1.275418 |
| H    | -5.673749 | -3.995037 | -1.343473 |
| H    | -4.259197 | -3.443342 | -2.259873 |
| H    | -4.080916 | -4.702512 | -1.017206 |

|   |           |           |           |
|---|-----------|-----------|-----------|
| C | 2.414376  | -1.415287 | -0.694696 |
| O | 2.532237  | -0.796700 | -1.734871 |
| O | 3.350739  | -2.195075 | -0.152342 |
| C | 4.607773  | -2.317620 | -0.889024 |
| H | 5.059768  | -1.323114 | -0.950878 |
| H | 4.373105  | -2.647861 | -1.904467 |
| C | 5.480336  | -3.305723 | -0.142818 |
| H | 5.000823  | -4.287415 | -0.083292 |
| H | 6.431481  | -3.420841 | -0.672791 |
| H | 5.694636  | -2.957846 | 0.872387  |
| C | -0.674527 | 1.809972  | -3.428538 |
| C | -0.168010 | 1.888755  | -2.127309 |
| C | -0.977363 | 1.597244  | -1.001044 |
| C | -2.324573 | 1.238752  | -1.254188 |
| C | -2.839198 | 1.162155  | -2.544226 |
| C | -2.003116 | 1.441069  | -3.632257 |
| H | -0.039442 | 2.040308  | -4.280995 |
| H | -2.977406 | 1.056551  | -0.404225 |
| H | -3.881535 | 0.906516  | -2.709145 |
| H | -2.389987 | 1.388174  | -4.645685 |
| N | 1.161809  | 2.350950  | -1.986980 |
| H | 1.568160  | 2.748103  | -2.824862 |
| C | 1.978050  | 2.307417  | -0.913350 |
| O | 1.689759  | 1.775913  | 0.182596  |
| C | 3.344308  | 2.925307  | -1.070352 |
| H | 4.081995  | 2.120014  | -1.159845 |
| H | 3.421772  | 3.576257  | -1.944834 |
| H | 3.580530  | 3.499714  | -0.171306 |
| H | -0.899869 | 2.506064  | -0.082524 |
| C | -1.061480 | 3.845881  | 3.154967  |
| H | -0.767539 | 4.879996  | 2.963087  |
| H | -2.139528 | 3.831765  | 3.353997  |
| H | -0.540120 | 3.450925  | 4.028479  |
| C | -0.787311 | 2.996061  | 1.936496  |
| O | -0.456077 | 1.778510  | 2.133250  |
| O | -0.926335 | 3.510632  | 0.789318  |

TS2a

B3LYP SCF energy: -1478.54145666 a.u.

B3LYP enthalpy: -1477.942635 a.u.

B3LYP free energy: -1478.045473 a.u.

M06 SCF energy in solution: -1479.17070186 a.u.

M06 enthalpy in solution: -1478.571880 a.u.

M06 free energy in solution: -1478.674718 a.u.

Three lowest frequencies (cm-1): -292.2441 16.1585 28.3674

Imaginary frequency: -292.2441 cm-1

Cartesian coordinates

| ATOM | X | Y | Z |
|------|---|---|---|
|------|---|---|---|



|    |           |           |           |
|----|-----------|-----------|-----------|
| C  | 0.969805  | -2.591737 | -1.516395 |
| C  | 0.707970  | -1.384005 | -2.284620 |
| C  | 1.843966  | -0.484840 | -2.122600 |
| C  | 2.697541  | -1.054113 | -1.150560 |
| C  | 2.141188  | -2.362925 | -0.765751 |
| C  | 0.152792  | -3.846938 | -1.558796 |
| H  | -0.919079 | -3.645055 | -1.481634 |
| H  | 0.321468  | -4.375152 | -2.506326 |
| H  | 0.419588  | -4.529385 | -0.748441 |
| C  | -0.360902 | -1.238675 | -3.327012 |
| H  | -0.700126 | -0.204347 | -3.428283 |
| H  | 0.026140  | -1.555750 | -4.305227 |
| H  | -1.231535 | -1.862181 | -3.107171 |
| C  | 4.024457  | -0.541089 | -0.678174 |
| H  | 4.837641  | -1.145969 | -1.100744 |
| H  | 4.191138  | 0.494557  | -0.982590 |
| H  | 4.109449  | -0.597137 | 0.411995  |
| Rh | 0.668246  | -0.695142 | -0.172538 |
| C  | -2.290062 | -1.930588 | 2.790689  |
| C  | -1.304824 | -1.156852 | 2.157957  |
| C  | -1.222442 | -1.098268 | 0.748188  |
| C  | -2.183298 | -1.836182 | 0.026883  |
| C  | -3.151712 | -2.615938 | 0.650134  |
| C  | -3.209995 | -2.661416 | 2.045782  |
| H  | -2.321355 | -1.968611 | 3.877609  |
| H  | -2.193148 | -1.754838 | -1.054847 |
| H  | -3.870889 | -3.167734 | 0.051873  |
| H  | -3.966351 | -3.253767 | 2.551001  |
| N  | -0.432692 | -0.442164 | 3.027602  |
| H  | -0.812630 | -0.247336 | 3.945240  |
| C  | 0.893352  | -0.234085 | 2.886672  |
| O  | 1.522551  | -0.486473 | 1.839274  |
| C  | 1.632795  | 0.337804  | 4.071052  |
| H  | 2.043231  | 1.313406  | 3.790519  |
| H  | 1.005382  | 0.456404  | 4.958217  |
| H  | 2.475100  | -0.317100 | 4.313660  |
| C  | 0.088520  | 1.284433  | 0.111035  |
| C  | -1.113858 | 0.820321  | 0.043517  |
| C  | 0.837675  | 2.519640  | 0.253169  |
| C  | 2.217318  | 2.518091  | 0.529940  |
| C  | 0.169834  | 3.758222  | 0.139617  |
| C  | 2.912304  | 3.718217  | 0.676210  |
| H  | 2.728956  | 1.570408  | 0.650241  |
| C  | 0.870174  | 4.951947  | 0.285567  |
| H  | -0.895248 | 3.774347  | -0.069585 |
| C  | 2.243276  | 4.937610  | 0.551159  |
| H  | 3.977048  | 3.701632  | 0.891831  |
| H  | 0.343861  | 5.897464  | 0.191047  |
| H  | 2.785834  | 5.871757  | 0.662923  |
| C  | -2.440543 | 1.176267  | -0.451317 |
| C  | -2.538183 | 1.847080  | -1.687131 |

|   |           |           |           |
|---|-----------|-----------|-----------|
| C | -3.610444 | 0.956215  | 0.298331  |
| C | -3.774752 | 2.283319  | -2.159666 |
| H | -1.636637 | 2.028451  | -2.265013 |
| C | -4.841561 | 1.402583  | -0.174500 |
| H | -3.547749 | 0.445629  | 1.253191  |
| C | -4.928643 | 2.061339  | -1.404846 |
| H | -3.836646 | 2.796389  | -3.114949 |
| H | -5.736729 | 1.238029  | 0.418033  |
| H | -5.892380 | 2.402000  | -1.771883 |
| C | 2.805098  | -3.292904 | 0.202483  |
| H | 3.700234  | -3.740255 | -0.249549 |
| H | 3.124476  | -2.759322 | 1.103217  |
| H | 2.142167  | -4.105803 | 0.507648  |
| C | 2.057084  | 0.784784  | -2.891247 |
| H | 2.531468  | 0.565307  | -3.856998 |
| H | 1.111745  | 1.293467  | -3.100080 |
| H | 2.699365  | 1.484920  | -2.352716 |

TS2b

B3LYP SCF energy: -1934.28194052 a.u.  
 B3LYP enthalpy: -1933.587398 a.u.  
 B3LYP free energy: -1933.712629 a.u.  
 M06 SCF energy in solution: -1934.86600065 a.u.  
 M06 enthalpy in solution: -1934.171458 a.u.  
 M06 free energy in solution: -1934.296689 a.u.  
 Three lowest frequencies (cm<sup>-1</sup>): -302.1517 6.4167 14.6272  
 Imaginary frequency: -302.1517 cm<sup>-1</sup>

Cartesian coordinates

| ATOM | X         | Y         | Z         |
|------|-----------|-----------|-----------|
| C    | -1.754827 | -0.930536 | -1.752340 |
| C    | -0.362527 | -0.793454 | -2.135468 |
| C    | 0.397888  | -1.804940 | -1.410839 |
| C    | -0.468420 | -2.433831 | -0.480550 |
| C    | -1.811779 | -1.864413 | -0.691933 |
| C    | -2.893839 | -0.221309 | -2.419952 |
| H    | -2.533800 | 0.516299  | -3.140039 |
| H    | -3.504974 | -0.951330 | -2.962703 |
| H    | -3.550951 | 0.269450  | -1.700288 |
| C    | 0.110060  | 0.002879  | -3.317348 |
| H    | 1.197197  | 0.041056  | -3.350614 |
| H    | -0.249520 | -0.466297 | -4.243080 |
| H    | -0.275669 | 1.026719  | -3.300063 |
| C    | -0.153116 | -3.523217 | 0.498446  |
| H    | -0.707425 | -4.429349 | 0.226972  |
| H    | 0.909994  | -3.756670 | 0.495504  |
| H    | -0.485633 | -3.248494 | 1.501690  |
| Rh   | -0.376607 | -0.181387 | 0.033891  |
| C    | 1.860907  | -2.016126 | -1.628464 |

|   |           |           |           |
|---|-----------|-----------|-----------|
| O | 2.607112  | -1.156555 | -2.060215 |
| O | 2.249334  | -3.263741 | -1.332554 |
| C | 3.664478  | -3.557079 | -1.527917 |
| H | 3.920331  | -3.325199 | -2.565306 |
| H | 4.241500  | -2.891406 | -0.879246 |
| C | 3.876507  | -5.020537 | -1.195150 |
| H | 4.930592  | -5.278256 | -1.342213 |
| H | 3.615264  | -5.233193 | -0.153472 |
| H | 3.273320  | -5.663510 | -1.843445 |
| C | -3.005025 | -2.300290 | 0.088392  |
| O | -2.942488 | -2.986536 | 1.089240  |
| O | -4.154866 | -1.861068 | -0.451295 |
| C | -5.373260 | -2.263809 | 0.236362  |
| H | -5.331995 | -1.882544 | 1.261086  |
| H | -5.393133 | -3.356180 | 0.286037  |
| C | -6.546519 | -1.701152 | -0.541344 |
| H | -6.561869 | -2.086397 | -1.565712 |
| H | -7.481757 | -1.993731 | -0.052746 |
| H | -6.509132 | -0.607618 | -0.579687 |
| C | -2.515878 | 3.073498  | 1.979380  |
| C | -1.526362 | 2.110392  | 1.733088  |
| C | -1.175902 | 1.754957  | 0.409988  |
| C | -1.872633 | 2.403418  | -0.630367 |
| C | -2.870186 | 3.341496  | -0.387315 |
| C | -3.188879 | 3.688639  | 0.928607  |
| H | -2.770960 | 3.324575  | 3.006808  |
| H | -1.592224 | 2.190133  | -1.655605 |
| H | -3.380734 | 3.816001  | -1.220138 |
| H | -3.952736 | 4.431051  | 1.137216  |
| N | -0.918585 | 1.540077  | 2.885294  |
| H | -0.980804 | 2.104386  | 3.723420  |
| C | -0.538444 | 0.258449  | 3.071578  |
| O | -0.470718 | -0.581104 | 2.150190  |
| C | -0.180229 | -0.167478 | 4.472181  |
| H | -0.312018 | 0.625719  | 5.212523  |
| H | -0.802158 | -1.024501 | 4.748746  |
| H | 0.862864  | -0.499775 | 4.481489  |
| C | 1.395363  | 0.753699  | 0.545930  |
| C | 0.830117  | 1.815142  | 0.071868  |
| C | 2.597084  | 0.259774  | 1.180043  |
| C | 2.719748  | -1.070663 | 1.621637  |
| C | 3.676472  | 1.147878  | 1.383715  |
| C | 3.894183  | -1.505355 | 2.234762  |
| H | 1.886405  | -1.751608 | 1.496000  |
| C | 4.845724  | 0.704903  | 1.992704  |
| H | 3.590505  | 2.177729  | 1.051187  |
| C | 4.960590  | -0.622350 | 2.419456  |
| H | 3.974368  | -2.534330 | 2.574125  |
| H | 5.670888  | 1.396476  | 2.135971  |
| H | 5.874634  | -0.963283 | 2.896729  |
| C | 1.160202  | 2.973854  | -0.747663 |

|   |           |          |           |
|---|-----------|----------|-----------|
| C | 2.105000  | 2.803987 | -1.781473 |
| C | 0.651267  | 4.258482 | -0.482067 |
| C | 2.525025  | 3.900639 | -2.531818 |
| H | 2.500450  | 1.812037 | -1.979170 |
| C | 1.082262  | 5.348862 | -1.232337 |
| H | -0.066563 | 4.397857 | 0.318956  |
| C | 2.014448  | 5.172361 | -2.260192 |
| H | 3.250765  | 3.761720 | -3.327774 |
| H | 0.694834  | 6.339696 | -1.014196 |
| H | 2.343573  | 6.026031 | -2.845623 |

TS3a

B3LYP SCF energy: -1478.13318933 a.u.  
 B3LYP enthalpy: -1477.547218 a.u.  
 B3LYP free energy: -1477.647651 a.u.  
 M06 SCF energy in solution: -1478.72749172 a.u.  
 M06 enthalpy in solution: -1478.141520 a.u.  
 M06 free energy in solution: -1478.241953 a.u.  
 Three lowest frequencies (cm<sup>-1</sup>): -135.0160 21.2108 29.3631  
 Imaginary frequency: -135.0160 cm<sup>-1</sup>

Cartesian coordinates

| ATOM | X         | Y         | Z         |
|------|-----------|-----------|-----------|
| C    | 3.088122  | 0.855794  | 0.570252  |
| C    | 3.246891  | -0.010282 | -0.601527 |
| C    | 2.569720  | 0.581647  | -1.689293 |
| C    | 1.902536  | 1.768120  | -1.185344 |
| C    | 2.334279  | 1.979995  | 0.190904  |
| C    | 3.723952  | 0.593363  | 1.905716  |
| H    | 3.581928  | -0.445671 | 2.221516  |
| H    | 4.806631  | 0.780471  | 1.873615  |
| H    | 3.300792  | 1.233585  | 2.684764  |
| C    | 4.141616  | -1.214788 | -0.641004 |
| H    | 3.912618  | -1.869061 | -1.487134 |
| H    | 5.194036  | -0.910474 | -0.736889 |
| H    | 4.062008  | -1.811214 | 0.273000  |
| C    | 1.172101  | 2.775094  | -2.027219 |
| H    | 1.871716  | 3.502441  | -2.464380 |
| H    | 0.637572  | 2.293799  | -2.851741 |
| H    | 0.435166  | 3.334146  | -1.443870 |
| Rh   | 0.920131  | 0.122622  | -0.073250 |
| C    | -1.377276 | 0.061177  | 1.845773  |
| C    | -0.612963 | -1.059930 | 2.252348  |
| C    | -0.762675 | -1.570118 | 3.548570  |
| C    | -1.651721 | -0.952544 | 4.435617  |
| C    | -2.408888 | 0.146986  | 4.039174  |
| C    | -2.274991 | 0.649733  | 2.740495  |
| H    | -0.188356 | -2.434733 | 3.845695  |
| H    | -1.747472 | -1.345622 | 5.444704  |

|   |           |           |           |
|---|-----------|-----------|-----------|
| H | -3.111271 | 0.611304  | 4.726282  |
| H | -2.891112 | 1.483454  | 2.422271  |
| N | 0.242779  | -1.539375 | 1.240657  |
| C | 0.681811  | -2.847455 | 1.214234  |
| O | 0.523429  | -3.643599 | 2.140230  |
| C | 1.377476  | -3.318758 | -0.053927 |
| H | 1.571484  | -2.518547 | -0.767793 |
| H | 2.317344  | -3.808567 | 0.219301  |
| H | 0.744834  | -4.078766 | -0.526810 |
| C | -0.792419 | -0.573355 | -0.519306 |
| C | -1.194555 | 0.451590  | 0.414310  |
| C | -1.498432 | -1.505613 | -1.361438 |
| C | -2.840798 | -1.843659 | -1.073339 |
| C | -0.866140 | -2.103705 | -2.472358 |
| C | -3.522791 | -2.756607 | -1.870881 |
| H | -3.324343 | -1.387961 | -0.214593 |
| C | -1.555571 | -3.007772 | -3.273005 |
| H | 0.162061  | -1.834999 | -2.690553 |
| C | -2.881951 | -3.337117 | -2.970815 |
| H | -4.551030 | -3.018690 | -1.638896 |
| H | -1.065751 | -3.459012 | -4.131232 |
| H | -3.417355 | -4.048020 | -3.594481 |
| C | -1.852712 | 1.692859  | -0.104839 |
| C | -2.551908 | 1.733728  | -1.324681 |
| C | -1.739338 | 2.896820  | 0.619785  |
| C | -3.118751 | 2.919894  | -1.793837 |
| H | -2.662095 | 0.831070  | -1.915958 |
| C | -2.308765 | 4.080590  | 0.152607  |
| H | -1.192196 | 2.897881  | 1.556789  |
| C | -3.003964 | 4.100491  | -1.059234 |
| H | -3.657174 | 2.915768  | -2.738298 |
| H | -2.205191 | 4.991096  | 0.737573  |
| H | -3.448259 | 5.022377  | -1.424250 |
| C | 2.571293  | 0.119559  | -3.118598 |
| H | 3.371802  | 0.609010  | -3.692226 |
| H | 2.732078  | -0.960718 | -3.197733 |
| H | 1.627534  | 0.355251  | -3.620580 |
| C | 2.013546  | 3.185198  | 1.025679  |
| H | 2.747922  | 3.985815  | 0.856377  |
| H | 1.028460  | 3.593971  | 0.781796  |
| H | 2.022428  | 2.951426  | 2.094640  |

TS3b

B3LYP SCF energy: -1933.88422138 a.u.  
 B3LYP enthalpy: -1933.202422 a.u.  
 B3LYP free energy: -1933.325067 a.u.  
 M06 SCF energy in solution: -1934.43507299 a.u.  
 M06 enthalpy in solution: -1933.753274 a.u.  
 M06 free energy in solution: -1933.875919 a.u.

Three lowest frequencies (cm-1):     -139.3032       12.6206       19.1565  
Imaginary frequency:             -139.3032 cm-1

Cartesian coordinates

| ATOM | X         | Y         | Z         |
|------|-----------|-----------|-----------|
| C    | -0.208878 | -2.475164 | -1.569477 |
| C    | 1.155295  | -2.439060 | -1.098033 |
| C    | 1.104380  | -2.313867 | 0.323246  |
| C    | -0.285888 | -2.273480 | 0.743728  |
| C    | -1.089954 | -2.462703 | -0.439787 |
| C    | -0.617962 | -2.615067 | -3.008039 |
| H    | 0.139972  | -2.203270 | -3.679715 |
| H    | -0.760365 | -3.673123 | -3.261508 |
| H    | -1.568027 | -2.116055 | -3.199662 |
| C    | 2.366702  | -2.659498 | -1.959541 |
| H    | 3.121407  | -1.881144 | -1.833105 |
| H    | 2.846073  | -3.610310 | -1.696171 |
| H    | 2.093092  | -2.709785 | -3.015711 |
| C    | -0.744755 | -2.320020 | 2.173496  |
| H    | -0.459591 | -3.283233 | 2.614458  |
| H    | -0.259272 | -1.549839 | 2.774513  |
| H    | -1.824279 | -2.207913 | 2.238947  |
| Rh   | 0.045410  | -0.382000 | -0.489217 |
| C    | 2.233243  | -2.303642 | 1.277369  |
| O    | 2.129082  | -2.360774 | 2.488548  |
| O    | 3.444139  | -2.239236 | 0.658023  |
| C    | 4.592297  | -2.290577 | 1.534629  |
| H    | 4.558347  | -1.432036 | 2.213247  |
| H    | 4.528538  | -3.195339 | 2.147002  |
| C    | 5.834883  | -2.280150 | 0.662985  |
| H    | 6.730160  | -2.320767 | 1.293012  |
| H    | 5.849027  | -3.142915 | -0.010696 |
| H    | 5.884280  | -1.370192 | 0.055036  |
| C    | -2.553661 | -2.590130 | -0.578908 |
| O    | -3.103324 | -3.045472 | -1.567432 |
| O    | -3.256137 | -2.162599 | 0.502182  |
| C    | -4.690786 | -2.315509 | 0.403014  |
| H    | -4.922042 | -3.372418 | 0.235774  |
| H    | -5.044618 | -1.757645 | -0.469137 |
| C    | -5.302375 | -1.798845 | 1.692374  |
| H    | -5.078625 | -0.736608 | 1.836759  |
| H    | -6.391244 | -1.915155 | 1.655846  |
| H    | -4.927519 | -2.355267 | 2.557944  |
| C    | -1.759016 | 1.954146  | -0.447650 |
| C    | -1.421867 | 1.836674  | -1.816920 |
| C    | -2.286090 | 2.345366  | -2.793140 |
| C    | -3.499753 | 2.920414  | -2.401731 |
| C    | -3.846387 | 3.016843  | -1.054462 |
| C    | -2.972842 | 2.537946  | -0.074038 |
| H    | -2.011121 | 2.278139  | -3.835625 |
| H    | -4.178007 | 3.291233  | -3.165863 |

|   |           |           |           |
|---|-----------|-----------|-----------|
| H | -4.786089 | 3.475899  | -0.759726 |
| H | -3.224680 | 2.644137  | 0.975265  |
| N | -0.206560 | 1.159653  | -2.022345 |
| C | 0.583401  | 1.401570  | -3.133193 |
| O | 0.255651  | 2.163447  | -4.040095 |
| C | 1.895305  | 0.642533  | -3.211324 |
| H | 2.334199  | 0.446253  | -2.231560 |
| H | 1.727406  | -0.322678 | -3.702482 |
| H | 2.588102  | 1.218795  | -3.829192 |
| C | 0.645870  | 1.350666  | 0.038746  |
| C | -0.697392 | 1.506252  | 0.492597  |
| C | 1.883021  | 2.075772  | 0.185103  |
| C | 1.866907  | 3.488684  | 0.240384  |
| C | 3.123710  | 1.403612  | 0.216662  |
| C | 3.056997  | 4.203450  | 0.326538  |
| H | 0.913798  | 4.007179  | 0.194537  |
| C | 4.309034  | 2.124276  | 0.322017  |
| H | 3.134250  | 0.319139  | 0.173724  |
| C | 4.277967  | 3.522010  | 0.373087  |
| H | 3.036853  | 5.288948  | 0.356399  |
| H | 5.260423  | 1.601147  | 0.360195  |
| H | 5.206595  | 4.081577  | 0.445913  |
| C | -0.964084 | 1.589982  | 1.969344  |
| C | -0.186369 | 2.360460  | 2.848109  |
| C | -2.050605 | 0.871221  | 2.501348  |
| C | -0.488954 | 2.416297  | 4.210197  |
| H | 0.657250  | 2.928577  | 2.473261  |
| C | -2.354157 | 0.932328  | 3.860282  |
| H | -2.644620 | 0.248683  | 1.839446  |
| C | -1.574459 | 1.706431  | 4.722908  |
| H | 0.127183  | 3.022468  | 4.869140  |
| H | -3.197406 | 0.365704  | 4.246694  |
| H | -1.808920 | 1.751968  | 5.782900  |

TS4a

B3LYP SCF energy: -1152.89046827 a.u.  
 B3LYP enthalpy: -1152.411597 a.u.  
 B3LYP free energy: -1152.498502 a.u.  
 M06 SCF energy in solution: -1153.65065724 a.u.  
 M06 enthalpy in solution: -1153.171786 a.u.  
 M06 free energy in solution: -1153.258691 a.u.  
 Three lowest frequencies (cm<sup>-1</sup>): -1142.2497 20.5853 41.2135  
 Imaginary frequency: -1142.2497 cm<sup>-1</sup>

Cartesian coordinates

| ATOM | X         | Y         | Z         |
|------|-----------|-----------|-----------|
| C    | -1.717344 | -0.382821 | -2.176543 |
| C    | -1.442509 | 0.088456  | -0.875542 |
| C    | -2.398592 | -0.150880 | 0.148357  |

|    |           |           |           |
|----|-----------|-----------|-----------|
| C  | -3.579516 | -0.836496 | -0.154319 |
| C  | -3.822700 | -1.297646 | -1.450802 |
| C  | -2.893043 | -1.070178 | -2.470598 |
| H  | -1.007924 | -0.171810 | -2.974091 |
| H  | -4.317412 | -1.025992 | 0.620574  |
| H  | -4.746150 | -1.830084 | -1.666836 |
| H  | -3.094047 | -1.415311 | -3.481907 |
| C  | -2.054677 | 0.374973  | 1.539835  |
| C  | 2.617735  | -0.487882 | 0.680898  |
| C  | 1.724384  | -1.447545 | 1.237009  |
| C  | 1.000480  | -2.066511 | 0.146264  |
| C  | 2.532094  | -0.577619 | -0.775322 |
| C  | 1.572555  | -1.569852 | -1.099435 |
| Rh | 0.531473  | 0.073361  | 0.073348  |
| O  | -0.901309 | 2.653917  | -1.136012 |
| C  | 0.208413  | 2.996364  | -0.612757 |
| O  | 1.010334  | 2.195826  | -0.057062 |
| C  | 0.564058  | 4.469795  | -0.641726 |
| H  | 0.261326  | 4.913869  | -1.593501 |
| H  | 0.009689  | 4.978057  | 0.155827  |
| H  | 1.632818  | 4.613371  | -0.472026 |
| H  | -1.039038 | 1.357669  | -0.957542 |
| C  | 1.448765  | -1.664392 | 2.693615  |
| H  | 0.609635  | -1.023464 | 2.999532  |
| H  | 1.181511  | -2.706907 | 2.893948  |
| H  | 2.320314  | -1.415534 | 3.305954  |
| C  | 0.027052  | -3.202330 | 0.268784  |
| H  | 0.543246  | -4.171462 | 0.214402  |
| H  | -0.508856 | -3.161493 | 1.220754  |
| H  | -0.719404 | -3.175347 | -0.529950 |
| C  | 1.255402  | -2.096726 | -2.467192 |
| H  | 1.422996  | -1.344639 | -3.243695 |
| H  | 1.898741  | -2.957796 | -2.696026 |
| H  | 0.217509  | -2.429733 | -2.540058 |
| C  | 3.372665  | 0.227800  | -1.720607 |
| H  | 4.415283  | -0.118009 | -1.709452 |
| H  | 3.008901  | 0.153842  | -2.749203 |
| H  | 3.369052  | 1.285360  | -1.437497 |
| C  | 3.533319  | 0.441217  | 1.420600  |
| H  | 4.583484  | 0.145585  | 1.291392  |
| H  | 3.422898  | 1.466164  | 1.051555  |
| H  | 3.312605  | 0.450506  | 2.490820  |
| C  | -2.699054 | 1.771218  | 1.728403  |
| H  | -3.794697 | 1.723113  | 1.689631  |
| H  | -2.400675 | 2.173431  | 2.703297  |
| H  | -2.355149 | 2.455990  | 0.948433  |
| C  | -2.552052 | -0.570775 | 2.655547  |
| H  | -2.187892 | -0.195878 | 3.617514  |
| H  | -3.646034 | -0.627823 | 2.706443  |
| H  | -2.157506 | -1.582049 | 2.508296  |
| O  | -0.651039 | 0.481019  | 1.678814  |



TS4b

B3LYP SCF energy: -1608.63505480 a.u.  
B3LYP enthalpy: -1608.060141 a.u.  
B3LYP free energy: -1608.167163 a.u.  
M06 SCF energy in solution: -1609.34776371 a.u.  
M06 enthalpy in solution: -1608.772850 a.u.  
M06 free energy in solution: -1608.879872 a.u.  
Three lowest frequencies (cm-1): -1022.7390 17.9423 24.0737  
Imaginary frequency: -1022.7390 cm-1

Cartesian coordinates

| ATOM | X         | Y         | Z         |
|------|-----------|-----------|-----------|
| C    | -1.270453 | 0.618065  | -2.460650 |
| C    | -1.150655 | 1.110414  | -1.142736 |
| C    | -2.327372 | 1.475470  | -0.433609 |
| C    | -3.572350 | 1.355334  | -1.058380 |
| C    | -3.663640 | 0.873924  | -2.367382 |
| C    | -2.514094 | 0.503615  | -3.075527 |
| H    | -0.367942 | 0.357373  | -3.009034 |
| H    | -4.480211 | 1.633647  | -0.530282 |
| H    | -4.639307 | 0.796428  | -2.841900 |
| H    | -2.593449 | 0.143535  | -4.098064 |
| C    | -2.132068 | 1.999875  | 0.985027  |
| C    | 0.433076  | -1.805851 | -0.345518 |
| C    | 1.738258  | -1.331145 | -0.014410 |
| C    | 1.765913  | -0.978619 | 1.408040  |
| C    | -0.374553 | -1.687663 | 0.857452  |
| C    | 0.479111  | -1.236395 | 1.947644  |
| Rh   | 0.268346  | 0.379350  | 0.332259  |
| O    | 0.536891  | 3.133767  | -1.261254 |
| C    | 1.512268  | 2.977820  | -0.467549 |
| O    | 1.676499  | 1.965979  | 0.279022  |
| C    | 2.541312  | 4.086529  | -0.381198 |
| H    | 3.475154  | 3.717370  | 0.046561  |
| H    | 2.712972  | 4.517300  | -1.370646 |
| H    | 2.145769  | 4.877003  | 0.267128  |
| H    | -0.241193 | 2.045708  | -1.132164 |
| C    | 2.942562  | -0.430807 | 2.159029  |
| H    | 3.386525  | 0.408177  | 1.617884  |
| H    | 2.644606  | -0.077866 | 3.148404  |
| H    | 3.715944  | -1.197451 | 2.276905  |
| C    | 0.035433  | -0.980899 | 3.355131  |
| H    | -0.636228 | -0.114367 | 3.374349  |
| H    | -0.519712 | -1.836987 | 3.743896  |
| H    | 0.888045  | -0.776932 | 4.006934  |
| C    | 0.027432  | -2.435401 | -1.645988 |
| H    | -0.099718 | -3.514558 | -1.489372 |
| H    | -0.929038 | -2.050872 | -1.996829 |

|   |           |           |           |
|---|-----------|-----------|-----------|
| H | 0.793593  | -2.271159 | -2.401818 |
| C | -1.783875 | -2.109735 | 1.050937  |
| O | -2.350891 | -2.130480 | 2.128302  |
| C | 2.864712  | -1.253264 | -0.979963 |
| O | 2.751402  | -1.223300 | -2.192196 |
| O | 4.062912  | -1.236348 | -0.357867 |
| O | -2.383859 | -2.475245 | -0.100197 |
| C | 5.218765  | -1.131466 | -1.222294 |
| H | 5.217544  | -1.980045 | -1.913423 |
| H | 5.128628  | -0.218322 | -1.819111 |
| C | 6.451026  | -1.116897 | -0.337065 |
| H | 7.350558  | -1.040232 | -0.957575 |
| H | 6.432303  | -0.263392 | 0.348254  |
| H | 6.519516  | -2.034913 | 0.255571  |
| C | -3.773307 | -2.863291 | 0.009688  |
| H | -4.334545 | -2.030729 | 0.444281  |
| H | -3.848266 | -3.711203 | 0.698004  |
| C | -4.259539 | -3.209911 | -1.384971 |
| H | -5.312100 | -3.511334 | -1.345175 |
| H | -4.170855 | -2.345774 | -2.050951 |
| H | -3.681059 | -4.037236 | -1.809007 |
| O | -0.880897 | 1.560541  | 1.490740  |
| C | -2.142052 | 3.547747  | 0.957824  |
| H | -3.114878 | 3.940565  | 0.636864  |
| H | -1.929057 | 3.923156  | 1.964996  |
| H | -1.373110 | 3.921587  | 0.276105  |
| C | -3.222832 | 1.489355  | 1.951793  |
| H | -2.996295 | 1.858347  | 2.957456  |
| H | -4.223606 | 1.846177  | 1.679563  |
| H | -3.231091 | 0.396091  | 1.986200  |

#### TS5a

B3LYP SCF energy: -1463.24545079 a.u.  
 B3LYP enthalpy: -1462.626026 a.u.  
 B3LYP free energy: -1462.728450 a.u.  
 M06 SCF energy in solution: -1463.81983844 a.u.  
 M06 enthalpy in solution: -1463.200414 a.u.  
 M06 free energy in solution: -1463.302838 a.u.  
 Three lowest frequencies (cm-1): -299.0871 14.6807 21.5343  
 Imaginary frequency: -299.0871 cm-1

#### Cartesian coordinates

| ATOM | X         | Y         | Z         |
|------|-----------|-----------|-----------|
| C    | -1.909689 | -2.003227 | -0.627177 |
| C    | -1.088044 | -1.326464 | 0.291427  |
| C    | -1.066344 | -1.739172 | 1.645980  |
| C    | -1.916293 | -2.780919 | 2.040219  |
| C    | -2.740231 | -3.437863 | 1.122253  |
| C    | -2.722120 | -3.060723 | -0.222398 |

|    |           |           |           |
|----|-----------|-----------|-----------|
| H  | -1.933382 | -1.672524 | -1.662333 |
| H  | -1.916439 | -3.108595 | 3.076408  |
| H  | -3.384021 | -4.247718 | 1.456049  |
| H  | -3.349608 | -3.573340 | -0.947427 |
| C  | -0.052104 | -1.082211 | 2.582405  |
| C  | 1.408633  | -0.915382 | -2.413728 |
| C  | 2.223441  | 0.167790  | -1.937038 |
| C  | 2.958758  | -0.308533 | -0.809174 |
| C  | 1.741579  | -2.107548 | -1.652990 |
| C  | 2.673344  | -1.735135 | -0.658613 |
| Rh | 0.791683  | -0.462366 | -0.237923 |
| C  | 2.304518  | 1.542386  | -2.535527 |
| H  | 3.114289  | 1.595977  | -3.276505 |
| H  | 1.376477  | 1.815456  | -3.047428 |
| H  | 2.498815  | 2.304996  | -1.776143 |
| C  | 0.530206  | -0.892994 | -3.632462 |
| H  | 0.074524  | 0.089839  | -3.788129 |
| H  | 1.105682  | -1.134675 | -4.537687 |
| H  | -0.276992 | -1.627960 | -3.556513 |
| C  | 1.174845  | -3.473248 | -1.909874 |
| H  | 1.517074  | -3.866272 | -2.876828 |
| H  | 1.478796  | -4.183542 | -1.136539 |
| H  | 0.079339  | -3.458974 | -1.925998 |
| C  | 3.278432  | -2.586155 | 0.415158  |
| H  | 2.929130  | -3.620846 | 0.360662  |
| H  | 4.373597  | -2.595209 | 0.341782  |
| H  | 3.002653  | -2.185211 | 1.398587  |
| C  | 3.987468  | 0.437145  | -0.011127 |
| H  | 3.943539  | 0.148502  | 1.043814  |
| H  | 5.003040  | 0.223242  | -0.374394 |
| H  | 3.834236  | 1.518469  | -0.066125 |
| C  | -0.135823 | 1.306016  | 0.191686  |
| C  | -1.215347 | 0.639000  | -0.052040 |
| C  | 0.411377  | 2.599206  | 0.562668  |
| C  | 1.444936  | 2.666798  | 1.517346  |
| C  | -0.076356 | 3.793587  | -0.001340 |
| C  | 1.972463  | 3.900408  | 1.894115  |
| H  | 1.785747  | 1.737768  | 1.963762  |
| C  | 0.462721  | 5.022854  | 0.376691  |
| H  | -0.879530 | 3.751675  | -0.730579 |
| C  | 1.488950  | 5.081123  | 1.322784  |
| H  | 2.762670  | 3.941425  | 2.639563  |
| H  | 0.078659  | 5.937332  | -0.068122 |
| H  | 1.906389  | 6.041020  | 1.615380  |
| C  | -2.590511 | 0.904082  | -0.489156 |
| C  | -2.810202 | 1.692842  | -1.632686 |
| C  | -3.701970 | 0.456190  | 0.246571  |
| C  | -4.105423 | 2.034187  | -2.024497 |
| H  | -1.955995 | 2.027871  | -2.214228 |
| C  | -4.992457 | 0.808718  | -0.140598 |
| H  | -3.542938 | -0.161302 | 1.124379  |

|   |           |           |           |
|---|-----------|-----------|-----------|
| C | -5.199828 | 1.595936  | -1.277478 |
| H | -4.257499 | 2.641532  | -2.912898 |
| H | -5.840892 | 0.466818  | 0.446130  |
| H | -6.209010 | 1.863286  | -1.579229 |
| O | 1.024265  | -0.579002 | 1.818528  |
| C | -0.728251 | 0.048483  | 3.399591  |
| H | -1.527096 | -0.343376 | 4.042404  |
| H | 0.020991  | 0.531729  | 4.037282  |
| H | -1.155567 | 0.808254  | 2.740950  |
| C | 0.551185  | -2.108403 | 3.569428  |
| H | 1.363446  | -1.620008 | 4.118001  |
| H | -0.178133 | -2.476568 | 4.301322  |
| H | 0.966964  | -2.963257 | 3.026402  |

TS5b

B3LYP SCF energy: -1918.99504991 a.u.  
 B3LYP enthalpy: -1918.279719 a.u.  
 B3LYP free energy: -1918.403435 a.u.  
 M06 SCF energy in solution: -1919.52646761 a.u.  
 M06 enthalpy in solution: -1918.811137 a.u.  
 M06 free energy in solution: -1918.934853 a.u.  
 Three lowest frequencies (cm-1): -297.1244 10.6604 16.7363  
 Imaginary frequency: -297.1244 cm-1

Cartesian coordinates

| ATOM | X         | Y         | Z         |
|------|-----------|-----------|-----------|
| C    | 2.252232  | 1.910588  | -0.856099 |
| C    | 1.512380  | 1.318746  | 0.182444  |
| C    | 2.057609  | 1.257338  | 1.488459  |
| C    | 3.302426  | 1.856525  | 1.718678  |
| C    | 4.022376  | 2.459723  | 0.684834  |
| C    | 3.505342  | 2.467037  | -0.613030 |
| H    | 1.829568  | 1.960097  | -1.854664 |
| H    | 3.733611  | 1.825623  | 2.715574  |
| H    | 4.989762  | 2.910477  | 0.891191  |
| H    | 4.066832  | 2.915420  | -1.428365 |
| C    | 1.303002  | 0.459431  | 2.546695  |
| C    | 0.649571  | -1.165681 | -2.277682 |
| C    | 1.425848  | -1.947359 | -1.334349 |
| C    | 0.521731  | -2.604581 | -0.439598 |
| C    | -0.735294 | -1.366263 | -1.994757 |
| C    | -0.822486 | -2.248770 | -0.852557 |
| Rh   | 0.198705  | -0.320002 | -0.122042 |
| C    | 1.196380  | -0.397253 | -3.446836 |
| H    | 2.175649  | 0.023372  | -3.223582 |
| H    | 1.332836  | -1.069980 | -4.303666 |
| H    | 0.517554  | 0.403296  | -3.755043 |
| C    | -1.873414 | -0.803582 | -2.798827 |
| H    | -2.347239 | -1.590835 | -3.397035 |

|   |           |           |           |
|---|-----------|-----------|-----------|
| H | -2.649811 | -0.382905 | -2.156596 |
| H | -1.522875 | -0.027126 | -3.483985 |
| C | 0.862790  | -3.500996 | 0.710921  |
| H | 0.830253  | -2.911201 | 1.637198  |
| H | 0.126138  | -4.299460 | 0.803994  |
| H | 1.865704  | -3.910630 | 0.600280  |
| C | -2.043411 | -2.820123 | -0.240143 |
| O | -2.068670 | -3.519554 | 0.756493  |
| C | 2.902811  | -1.991623 | -1.361719 |
| O | 3.576576  | -1.655588 | -2.321456 |
| O | -3.162874 | -2.501238 | -0.932845 |
| O | 3.453650  | -2.439096 | -0.209976 |
| C | -4.399276 | -3.025387 | -0.398678 |
| H | -4.486873 | -2.720732 | 0.647454  |
| H | -4.357740 | -4.119426 | -0.428181 |
| C | -5.532531 | -2.474760 | -1.244679 |
| H | -5.415228 | -2.759065 | -2.295705 |
| H | -6.488328 | -2.872931 | -0.886110 |
| H | -5.570178 | -1.382555 | -1.180061 |
| C | 4.897405  | -2.499146 | -0.191838 |
| H | 5.291406  | -1.493058 | -0.366181 |
| H | 5.236542  | -3.135190 | -1.015927 |
| C | 5.316304  | -3.046308 | 1.160313  |
| H | 6.409409  | -3.099810 | 1.214855  |
| H | 4.961881  | -2.401187 | 1.970640  |
| H | 4.914715  | -4.052277 | 1.320337  |
| C | -1.243782 | 1.013566  | 0.418555  |
| C | -0.394984 | 1.902163  | 0.021089  |
| C | -2.563145 | 0.790232  | 0.981915  |
| C | -2.761727 | -0.235931 | 1.924608  |
| C | -3.650869 | 1.607462  | 0.615976  |
| C | -4.021731 | -0.433024 | 2.487707  |
| H | -1.910066 | -0.841018 | 2.217302  |
| C | -4.908368 | 1.397322  | 1.179329  |
| H | -3.502430 | 2.405672  | -0.104907 |
| C | -5.098578 | 0.377131  | 2.115696  |
| H | -4.160320 | -1.221131 | 3.223081  |
| H | -5.740205 | 2.033972  | 0.889213  |
| H | -6.079554 | 0.218477  | 2.555915  |
| C | -0.394417 | 3.258682  | -0.532086 |
| C | 0.379499  | 4.289043  | 0.030397  |
| C | -1.249967 | 3.560062  | -1.607211 |
| C | 0.280828  | 5.589040  | -0.458744 |
| H | 1.047973  | 4.062097  | 0.854174  |
| C | -1.336573 | 4.861919  | -2.101811 |
| H | -1.837382 | 2.762678  | -2.053136 |
| C | -0.573710 | 5.879655  | -1.526925 |
| H | 0.873743  | 6.379343  | -0.006494 |
| H | -1.998477 | 5.078770  | -2.935939 |
| H | -0.641660 | 6.894395  | -1.909632 |
| O | 0.480536  | -0.490803 | 1.896778  |

|   |           |           |          |
|---|-----------|-----------|----------|
| C | 2.271177  | -0.349702 | 3.439302 |
| H | 2.898285  | 0.289385  | 4.072390 |
| H | 1.678419  | -0.997885 | 4.092890 |
| H | 2.915141  | -0.981742 | 2.819957 |
| C | 0.460463  | 1.400840  | 3.442290 |
| H | -0.117358 | 0.800931  | 4.154160 |
| H | 1.099735  | 2.090028  | 4.008538 |
| H | -0.240335 | 1.990358  | 2.846159 |

TS6a

B3LYP SCF energy: -1463.26164774 a.u.  
 B3LYP enthalpy: -1462.640611 a.u.  
 B3LYP free energy: -1462.738575 a.u.  
 M06 SCF energy in solution: -1463.83959655 a.u.  
 M06 enthalpy in solution: -1463.218560 a.u.  
 M06 free energy in solution: -1463.316524 a.u.  
 Three lowest frequencies (cm-1): -329.3125 24.2817 27.7734  
 Imaginary frequency: -329.3125 cm-1

Cartesian coordinates

| ATOM | X         | Y         | Z         |
|------|-----------|-----------|-----------|
| C    | -2.263271 | -2.046120 | -1.569968 |
| C    | -1.845476 | -1.429164 | -0.377595 |
| C    | -1.314746 | -2.236965 | 0.657295  |
| C    | -1.291405 | -3.627043 | 0.487045  |
| C    | -1.749577 | -4.229252 | -0.686856 |
| C    | -2.223906 | -3.431988 | -1.727739 |
| H    | -2.621709 | -1.422523 | -2.383939 |
| H    | -0.912124 | -4.262603 | 1.280499  |
| H    | -1.722958 | -5.311208 | -0.787522 |
| H    | -2.562139 | -3.882586 | -2.657640 |
| C    | -0.847774 | -1.582910 | 1.970581  |
| C    | 2.262570  | -1.574268 | -0.888054 |
| C    | 1.995330  | -0.564810 | -1.863577 |
| C    | 2.723133  | 0.602437  | -1.459643 |
| C    | 3.305086  | -1.074482 | 0.025806  |
| C    | 3.596463  | 0.244289  | -0.336693 |
| Rh   | 1.288902  | 0.144137  | 0.184055  |
| C    | 1.122252  | -0.701889 | -3.075976 |
| H    | 1.706045  | -1.037844 | -3.944973 |
| H    | 0.320146  | -1.425896 | -2.910031 |
| H    | 0.654405  | 0.250502  | -3.343656 |
| C    | 1.833378  | -3.008221 | -0.969171 |
| H    | 0.864309  | -3.120677 | -1.459016 |
| H    | 2.572951  | -3.586600 | -1.543059 |
| H    | 1.758040  | -3.466884 | 0.019672  |
| C    | 3.951361  | -1.890446 | 1.106388  |
| H    | 4.681945  | -2.594467 | 0.683443  |
| H    | 4.478979  | -1.259571 | 1.827526  |

|   |           |           |           |
|---|-----------|-----------|-----------|
| H | 3.216927  | -2.482746 | 1.661232  |
| C | 4.594339  | 1.176717  | 0.282722  |
| H | 4.949689  | 0.807479  | 1.248987  |
| H | 5.471229  | 1.301611  | -0.368135 |
| H | 4.164692  | 2.172173  | 0.441573  |
| C | 2.821562  | 1.889513  | -2.224032 |
| H | 2.923363  | 2.752618  | -1.559605 |
| H | 3.699907  | 1.874602  | -2.885156 |
| H | 1.939975  | 2.054956  | -2.848445 |
| C | -0.762108 | 0.578684  | 0.327460  |
| C | -1.914012 | 0.047246  | -0.178230 |
| C | -0.154136 | 1.880652  | 0.476360  |
| C | 0.754667  | 2.117752  | 1.555754  |
| C | -0.251490 | 2.870639  | -0.557868 |
| C | 1.523053  | 3.308481  | 1.575429  |
| H | 0.705932  | 1.489667  | 2.435609  |
| C | 0.489927  | 4.026714  | -0.493089 |
| H | -0.943057 | 2.697543  | -1.375730 |
| C | 1.399637  | 4.248471  | 0.572682  |
| H | 2.185512  | 3.489167  | 2.418072  |
| H | 0.379289  | 4.779950  | -1.268962 |
| H | 1.974850  | 5.169787  | 0.607596  |
| C | -3.201459 | 0.776387  | -0.265451 |
| C | -3.354660 | 2.103976  | 0.204392  |
| C | -4.371650 | 0.162078  | -0.770555 |
| C | -4.569720 | 2.778215  | 0.127781  |
| H | -2.515735 | 2.616741  | 0.658445  |
| C | -5.587922 | 0.839666  | -0.843914 |
| H | -4.339952 | -0.870557 | -1.094573 |
| C | -5.701871 | 2.159364  | -0.407720 |
| H | -4.631961 | 3.796978  | 0.504131  |
| H | -6.456580 | 0.320120  | -1.242434 |
| H | -6.649383 | 2.687641  | -0.468517 |
| O | -0.099373 | -0.373601 | 1.755414  |
| C | -2.078539 | -1.191670 | 2.822903  |
| H | -2.658535 | -2.082857 | 3.088943  |
| H | -1.744393 | -0.702773 | 3.744947  |
| H | -2.730607 | -0.503173 | 2.281737  |
| C | 0.066657  | -2.492805 | 2.808281  |
| H | 0.449276  | -1.913325 | 3.653769  |
| H | -0.468081 | -3.360733 | 3.209293  |
| H | 0.919985  | -2.847378 | 2.221656  |

TS6b

B3LYP SCF energy: -1919.01867135 a.u.  
 B3LYP enthalpy: -1918.302149 a.u.  
 B3LYP free energy: -1918.424701 a.u.  
 M06 SCF energy in solution: -1919.54874459 a.u.  
 M06 enthalpy in solution: -1918.832222 a.u.

M06 free energy in solution: -1918.954774 a.u.  
Three lowest frequencies (cm-1): -171.3180 12.9263 15.1848  
Imaginary frequency: -171.3180 cm-1

Cartesian coordinates

| ATOM | X         | Y         | Z         |
|------|-----------|-----------|-----------|
| C    | -1.375064 | -3.029372 | -0.241609 |
| C    | -0.613013 | -2.155748 | 0.567768  |
| C    | -1.190324 | -1.687969 | 1.783529  |
| C    | -2.464440 | -2.145714 | 2.138515  |
| C    | -3.194325 | -3.022719 | 1.334411  |
| C    | -2.645594 | -3.458143 | 0.128846  |
| H    | -0.945267 | -3.383156 | -1.173357 |
| H    | -2.905303 | -1.802421 | 3.067737  |
| H    | -4.179346 | -3.356892 | 1.649377  |
| H    | -3.196286 | -4.135370 | -0.519053 |
| C    | -0.430032 | -0.698116 | 2.673816  |
| C    | -1.653688 | 0.932922  | -1.882281 |
| C    | -2.232080 | 1.532673  | -0.704015 |
| C    | -1.242087 | 2.406745  | -0.135026 |
| C    | -0.380849 | 1.551321  | -2.144677 |
| C    | -0.121452 | 2.469935  | -1.072069 |
| Rh   | -0.232553 | 0.391845  | -0.151280 |
| C    | -2.288878 | -0.100333 | -2.768433 |
| H    | -2.705500 | -0.923528 | -2.184673 |
| H    | -3.117278 | 0.344278  | -3.332181 |
| H    | -1.568150 | -0.505019 | -3.482814 |
| C    | 0.445343  | 1.332301  | -3.380671 |
| H    | 0.361851  | 0.301992  | -3.737980 |
| H    | 0.097536  | 1.991195  | -4.188177 |
| H    | 1.494063  | 1.568239  | -3.208652 |
| C    | -1.409718 | 3.256563  | 1.091868  |
| H    | -0.566620 | 3.124957  | 1.772446  |
| H    | -1.431192 | 4.314377  | 0.803798  |
| H    | -2.336796 | 3.001827  | 1.600391  |
| C    | 1.042526  | 3.380767  | -1.027438 |
| O    | 1.854171  | 3.502573  | -1.932846 |
| C    | -3.529605 | 1.216000  | -0.080455 |
| O    | -3.897976 | 1.572791  | 1.027789  |
| O    | 1.126742  | 4.080422  | 0.121448  |
| O    | -4.323133 | 0.475096  | -0.894436 |
| C    | 2.260963  | 4.970149  | 0.238870  |
| H    | 2.234185  | 5.686410  | -0.588551 |
| H    | 3.177829  | 4.380809  | 0.140679  |
| C    | 2.165790  | 5.652152  | 1.590901  |
| H    | 2.187538  | 4.916635  | 2.401264  |
| H    | 3.013096  | 6.334479  | 1.720772  |
| H    | 1.241065  | 6.232286  | 1.674398  |
| C    | -5.586787 | 0.065575  | -0.329478 |
| H    | -6.152497 | 0.956855  | -0.040195 |
| H    | -5.393145 | -0.515065 | 0.578110  |



|   |           |           |           |
|---|-----------|-----------|-----------|
| C | -6.312303 | -0.753314 | -1.381619 |
| H | -7.284202 | -1.078279 | -0.993938 |
| H | -6.483794 | -0.164428 | -2.288734 |
| H | -5.734480 | -1.643459 | -1.651128 |
| C | 1.408155  | -0.639151 | 0.222576  |
| C | 0.808415  | -1.873829 | 0.128946  |
| C | 2.814548  | -0.277302 | 0.294067  |
| C | 3.685157  | -1.001643 | 1.135802  |
| C | 3.335771  | 0.807738  | -0.434390 |
| C | 5.029226  | -0.655743 | 1.233826  |
| H | 3.292653  | -1.833712 | 1.710519  |
| C | 4.683869  | 1.146240  | -0.341126 |
| H | 2.684096  | 1.375760  | -1.085453 |
| C | 5.534604  | 0.418653  | 0.494971  |
| H | 5.684954  | -1.222903 | 1.889038  |
| H | 5.067565  | 1.979690  | -0.923411 |
| H | 6.584953  | 0.686926  | 0.572665  |
| C | 1.547441  | -3.003931 | -0.515261 |
| C | 1.519375  | -4.283980 | 0.070335  |
| C | 2.308758  | -2.822954 | -1.681956 |
| C | 2.246629  | -5.337009 | -0.480474 |
| H | 0.927566  | -4.446828 | 0.966289  |
| C | 3.031315  | -3.879922 | -2.236400 |
| H | 2.330018  | -1.846558 | -2.156084 |
| C | 3.005746  | -5.140326 | -1.637485 |
| H | 2.221248  | -6.313846 | -0.004383 |
| H | 3.610682  | -3.717417 | -3.141498 |
| H | 3.567260  | -5.964007 | -2.070084 |
| O | 0.314987  | 0.207055  | 1.870435  |
| C | -1.369295 | 0.148817  | 3.558674  |
| H | -1.848841 | -0.436762 | 4.352304  |
| H | -0.766905 | 0.927652  | 4.036724  |
| H | -2.144706 | 0.630443  | 2.955455  |
| C | 0.565939  | -1.464121 | 3.577151  |
| H | 1.177243  | -0.746815 | 4.135485  |
| H | 0.037117  | -2.106544 | 4.291522  |
| H | 1.234115  | -2.091583 | 2.979780  |

TS7a

B3LYP SCF energy: -1168.18310202 a.u.

B3LYP enthalpy: -1167.725123 a.u.

B3LYP free energy: -1167.812582 a.u.

M06 SCF energy in solution: -1169.01213920 a.u.

M06 enthalpy in solution: -1168.554160 a.u.

M06 free energy in solution: -1168.641619 a.u.

Three lowest frequencies (cm<sup>-1</sup>): -644.3082 25.9945 40.8680

Imaginary frequency: -644.3082 cm<sup>-1</sup>

Cartesian coordinates

| ATOM | X         | Y         | Z         |
|------|-----------|-----------|-----------|
| C    | -0.703472 | -2.272543 | -0.491199 |
| C    | 0.716479  | -2.344256 | -0.652269 |
| C    | 1.328003  | -1.988875 | 0.626065  |
| C    | 0.274062  | -1.726664 | 1.568709  |
| C    | -0.982292 | -1.833121 | 0.866164  |
| C    | -1.741482 | -2.597008 | -1.516562 |
| H    | -1.322125 | -2.633682 | -2.524047 |
| H    | -2.175548 | -3.581712 | -1.296773 |
| H    | -2.559171 | -1.869577 | -1.511520 |
| C    | 1.478486  | -2.755598 | -1.872743 |
| H    | 2.308873  | -2.069438 | -2.062900 |
| H    | 1.895536  | -3.761708 | -1.736066 |
| H    | 0.843389  | -2.773635 | -2.761005 |
| C    | 0.417242  | -1.424977 | 3.024205  |
| H    | -0.245876 | -0.611345 | 3.335123  |
| H    | 0.136952  | -2.314335 | 3.604917  |
| H    | 1.443829  | -1.165214 | 3.291757  |
| Rh   | 0.218340  | -0.268470 | -0.152083 |
| C    | -2.656433 | 1.538171  | 0.248194  |
| C    | -1.306830 | 1.589104  | -0.198273 |
| C    | -1.036727 | 1.381883  | -1.588229 |
| C    | -2.087830 | 1.079693  | -2.478267 |
| C    | -3.391420 | 1.011723  | -2.020258 |
| C    | -3.665203 | 1.269442  | -0.658603 |
| H    | -1.864074 | 0.953816  | -3.533381 |
| H    | -4.207064 | 0.808872  | -2.707506 |
| H    | -4.694864 | 1.262757  | -0.311896 |
| N    | -0.164816 | 1.785865  | 0.605943  |
| C    | -0.224716 | 1.877551  | 2.022048  |
| O    | -1.177991 | 1.506338  | 2.688435  |
| C    | 1.017691  | 2.480183  | 2.639501  |
| H    | 0.997581  | 2.322679  | 3.718716  |
| H    | 1.932362  | 2.060586  | 2.210036  |
| H    | 1.037255  | 3.558860  | 2.440419  |
| C    | -2.333953 | -1.712574 | 1.497182  |
| H    | -3.108562 | -1.501991 | 0.756816  |
| H    | -2.594045 | -2.656868 | 1.994648  |
| H    | -2.352726 | -0.918174 | 2.247618  |
| C    | 2.797531  | -2.012013 | 0.900255  |
| H    | 3.359908  | -1.596692 | 0.059805  |
| H    | 3.053546  | -1.446707 | 1.799204  |
| H    | 3.132783  | -3.047295 | 1.048348  |
| H    | -0.066444 | 1.632911  | -1.997652 |
| H    | -2.877912 | 1.720244  | 1.289520  |
| C    | 3.748256  | 1.979531  | -1.852624 |
| H    | 3.596850  | 2.810086  | -2.549431 |
| H    | 4.493304  | 2.307582  | -1.119820 |
| H    | 4.114154  | 1.103273  | -2.388481 |
| C    | 2.453243  | 1.679778  | -1.143803 |
| O    | 1.969479  | 0.511608  | -1.202059 |

|   |          |          |           |
|---|----------|----------|-----------|
| O | 1.899201 | 2.651748 | -0.514018 |
| H | 0.921170 | 2.312683 | 0.009853  |

TS7b

B3LYP SCF energy: -1623.91651318 a.u.  
 B3LYP enthalpy: -1623.362863 a.u.  
 B3LYP free energy: -1623.470858 a.u.  
 M06 SCF energy in solution: -1624.69801838 a.u.  
 M06 enthalpy in solution: -1624.144368 a.u.  
 M06 free energy in solution: -1624.252363 a.u.  
 Three lowest frequencies (cm-1): -580.6138 19.7491 23.5036  
 Imaginary frequency: -580.6138 cm-1

Cartesian coordinates

| ATOM | X         | Y         | Z         |
|------|-----------|-----------|-----------|
| C    | 1.277442  | 0.886971  | -1.657528 |
| C    | -0.101243 | 1.013661  | -2.000787 |
| C    | -0.810560 | 1.455496  | -0.802463 |
| C    | 0.145769  | 1.705945  | 0.253188  |
| C    | 1.419033  | 1.269752  | -0.254332 |
| C    | 2.394428  | 0.446968  | -2.548293 |
| H    | 2.020174  | -0.035622 | -3.452821 |
| H    | 2.997580  | 1.314576  | -2.839105 |
| H    | 3.050123  | -0.254362 | -2.026888 |
| C    | -0.710305 | 0.754627  | -3.341351 |
| H    | -1.601804 | 0.130097  | -3.261137 |
| H    | -1.037425 | 1.705049  | -3.779749 |
| H    | 0.006416  | 0.288621  | -4.020181 |
| C    | -0.104916 | 2.308526  | 1.596696  |
| H    | -0.415198 | 3.351762  | 1.463250  |
| H    | -0.924865 | 1.806800  | 2.116760  |
| H    | 0.795192  | 2.274081  | 2.209881  |
| Rh   | 0.144574  | -0.491818 | -0.327714 |
| C    | -2.278339 | 1.760841  | -0.796986 |
| O    | -2.987674 | 1.592877  | -1.768218 |
| O    | -2.686622 | 2.239830  | 0.378569  |
| C    | -4.103950 | 2.575091  | 0.492141  |
| H    | -4.319579 | 3.373109  | -0.224138 |
| H    | -4.683383 | 1.694476  | 0.202270  |
| C    | -4.358230 | 2.990245  | 1.926787  |
| H    | -5.419053 | 3.230639  | 2.052030  |
| H    | -4.102187 | 2.182186  | 2.619123  |
| H    | -3.775188 | 3.877803  | 2.191566  |
| C    | 2.687026  | 1.290857  | 0.547541  |
| O    | 2.742538  | 0.952588  | 1.713423  |
| O    | 3.709632  | 1.746380  | -0.174264 |
| C    | 4.999417  | 1.849248  | 0.513169  |
| H    | 5.278322  | 0.848204  | 0.854113  |
| H    | 4.859795  | 2.482279  | 1.393325  |

|   |           |           |           |
|---|-----------|-----------|-----------|
| C | 5.995263  | 2.429471  | -0.469395 |
| H | 5.685182  | 3.423616  | -0.805300 |
| H | 6.970735  | 2.522770  | 0.018911  |
| H | 6.112645  | 1.782928  | -1.344586 |
| C | -3.056126 | -1.340374 | 0.379288  |
| C | -1.713940 | -1.814830 | 0.349954  |
| C | -1.240633 | -2.468241 | -0.837210 |
| C | -2.080868 | -2.582608 | -1.967359 |
| C | -3.369776 | -2.089218 | -1.926937 |
| C | -3.853255 | -1.494190 | -0.738142 |
| H | -3.428484 | -0.872265 | 1.277920  |
| H | -0.333598 | -3.058475 | -0.804819 |
| H | -1.713301 | -3.106329 | -2.844626 |
| H | -4.027104 | -2.190827 | -2.784622 |
| H | -4.882005 | -1.148089 | -0.702289 |
| N | -0.732527 | -1.636947 | 1.341581  |
| C | -0.957024 | -0.920993 | 2.557144  |
| O | -1.974024 | -0.291015 | 2.787864  |
| C | 0.204420  | -1.000420 | 3.521101  |
| H | 0.476376  | -2.041202 | 3.726105  |
| H | 1.087620  | -0.505668 | 3.098783  |
| H | -0.077012 | -0.504774 | 4.451043  |
| C | 3.321987  | -3.584544 | 0.301469  |
| H | 3.122368  | -4.660013 | 0.286856  |
| H | 3.865856  | -3.286779 | -0.595410 |
| H | 3.932482  | -3.379748 | 1.188197  |
| C | 2.023580  | -2.832831 | 0.422228  |
| O | 1.216607  | -3.205121 | 1.345554  |
| O | 1.784608  | -1.883522 | -0.383224 |
| H | 0.285462  | -2.527240 | 1.374443  |

TS8a

B3LYP SCF energy: -1167.73969821 a.u.  
 B3LYP enthalpy: -1167.295733 a.u.  
 B3LYP free energy: -1167.384641 a.u.  
 M06 SCF energy in solution: -1168.52232764 a.u.  
 M06 enthalpy in solution: -1168.078362 a.u.  
 M06 free energy in solution: -1168.167270 a.u.  
 Three lowest frequencies (cm-1): -1182.8474 12.2003 40.1792  
 Imaginary frequency: -1182.8474 cm-1

Cartesian coordinates

| ATOM | X        | Y         | Z         |
|------|----------|-----------|-----------|
| C    | 1.512661 | -1.489405 | -1.268322 |
| C    | 2.448863 | -0.508014 | -0.842923 |
| C    | 2.520406 | -0.542134 | 0.616221  |
| C    | 1.613072 | -1.534773 | 1.072134  |
| C    | 0.918031 | -2.079793 | -0.079737 |
| C    | 1.216902 | -1.892304 | -2.682514 |

|    |           |           |           |
|----|-----------|-----------|-----------|
| H  | 1.362881  | -1.063656 | -3.381094 |
| H  | 1.886185  | -2.707970 | -2.989524 |
| H  | 0.189501  | -2.246592 | -2.792103 |
| C  | 3.294850  | 0.378002  | -1.708265 |
| H  | 3.259494  | 1.414766  | -1.358252 |
| H  | 4.344207  | 0.054172  | -1.689270 |
| H  | 2.960501  | 0.363796  | -2.748979 |
| C  | 1.406968  | -1.983231 | 2.487677  |
| H  | 0.360056  | -2.228290 | 2.686184  |
| H  | 1.999939  | -2.887386 | 2.683231  |
| H  | 1.716686  | -1.221635 | 3.206933  |
| Rh | 0.418966  | 0.056017  | -0.055737 |
| C  | -3.480379 | -0.584095 | 0.298013  |
| C  | -2.184527 | -0.042545 | 0.193073  |
| C  | -1.516492 | 0.051888  | -1.062313 |
| C  | -2.119681 | -0.517687 | -2.200984 |
| C  | -3.404857 | -1.047493 | -2.109991 |
| C  | -4.070175 | -1.065612 | -0.868914 |
| H  | -1.620468 | -0.471230 | -3.167475 |
| H  | -3.907049 | -1.426555 | -2.996547 |
| H  | -5.075481 | -1.478519 | -0.816933 |
| N  | -1.284246 | 0.366574  | 1.163569  |
| C  | -1.576694 | 0.526412  | 2.491509  |
| O  | -2.697832 | 0.344939  | 2.972271  |
| C  | -0.429450 | 1.009324  | 3.367599  |
| H  | 0.464445  | 1.259381  | 2.791776  |
| H  | -0.765799 | 1.894708  | 3.917215  |
| H  | -0.187683 | 0.244559  | 4.114731  |
| C  | -0.049230 | -3.227206 | -0.055587 |
| H  | -0.733589 | -3.188757 | -0.907207 |
| H  | 0.479596  | -4.190104 | -0.089015 |
| H  | -0.659035 | -3.212733 | 0.852132  |
| C  | 3.448064  | 0.300062  | 1.440057  |
| H  | 3.440392  | 1.340607  | 1.099676  |
| H  | 3.167193  | 0.293919  | 2.496558  |
| H  | 4.481554  | -0.066214 | 1.367450  |
| H  | -1.124103 | 1.327526  | -1.354021 |
| H  | -3.976179 | -0.634857 | 1.258010  |
| C  | 0.355633  | 4.425260  | -0.847488 |
| H  | 0.309421  | 4.812690  | -1.868850 |
| H  | -0.411795 | 4.943957  | -0.261785 |
| H  | 1.334126  | 4.622389  | -0.406202 |
| C  | 0.050873  | 2.941379  | -0.841143 |
| O  | 0.752418  | 2.188718  | -0.107965 |
| O  | -0.915558 | 2.548470  | -1.573316 |

TS8b

B3LYP SCF energy: -1623.48339625 a.u.

B3LYP enthalpy: -1622.943550 a.u.

B3LYP free energy: -1623.052908 a.u.  
 M06 SCF energy in solution: -1624.21591298 a.u.  
 M06 enthalpy in solution: -1623.676067 a.u.  
 M06 free energy in solution: -1623.785425 a.u.  
 Three lowest frequencies (cm-1): -1124.3128 17.0723 24.4290  
 Imaginary frequency: -1124.3128 cm-1

Cartesian coordinates

| ATOM | X         | Y         | Z         |
|------|-----------|-----------|-----------|
| C    | 0.508902  | -1.591803 | 1.499020  |
| C    | -0.866116 | -1.387559 | 1.788131  |
| C    | -1.624937 | -1.474256 | 0.542791  |
| C    | -0.701527 | -1.711731 | -0.529460 |
| C    | 0.622820  | -1.745763 | 0.051286  |
| C    | 1.609085  | -1.708297 | 2.514797  |
| H    | 1.312250  | -1.267423 | 3.469088  |
| H    | 1.848773  | -2.764850 | 2.690383  |
| H    | 2.523415  | -1.225164 | 2.173658  |
| C    | -1.455145 | -1.146165 | 3.145907  |
| H    | -2.120480 | -0.280626 | 3.131826  |
| H    | -2.060378 | -2.005290 | 3.453410  |
| H    | -0.674289 | -0.981585 | 3.891840  |
| C    | -0.997238 | -1.955553 | -1.980869 |
| H    | -0.413108 | -1.287197 | -2.615445 |
| H    | -0.684029 | -2.972796 | -2.243882 |
| H    | -2.057240 | -1.842382 | -2.191140 |
| Rh   | -0.128157 | 0.311460  | 0.432979  |
| C    | -3.103589 | -1.386436 | 0.520340  |
| O    | -3.792528 | -1.355503 | 1.524046  |
| O    | -3.632629 | -1.354471 | -0.724223 |
| C    | -5.078121 | -1.281059 | -0.788217 |
| H    | -5.496150 | -2.124132 | -0.229891 |
| H    | -5.402468 | -0.360878 | -0.292703 |
| C    | -5.474875 | -1.310952 | -2.252368 |
| H    | -6.565542 | -1.255146 | -2.338657 |
| H    | -5.044216 | -0.463294 | -2.794822 |
| H    | -5.140218 | -2.236432 | -2.732298 |
| C    | 1.842241  | -2.042818 | -0.747237 |
| O    | 1.870704  | -2.096788 | -1.961274 |
| O    | 2.923683  | -2.271322 | 0.026673  |
| C    | 4.160771  | -2.512543 | -0.687405 |
| H    | 4.381761  | -1.632350 | -1.298393 |
| H    | 4.017160  | -3.363118 | -1.360385 |
| C    | 5.239875  | -2.776458 | 0.345802  |
| H    | 4.991329  | -3.646850 | 0.961795  |
| H    | 6.192546  | -2.972856 | -0.158060 |
| H    | 5.372666  | -1.911985 | 1.004468  |
| C    | 1.727774  | 1.369781  | 0.156518  |
| C    | 1.326304  | 1.790747  | -1.149109 |
| C    | 2.274508  | 2.171904  | -2.121233 |
| C    | 3.616172  | 2.050219  | -1.779865 |

|   |           |          |           |
|---|-----------|----------|-----------|
| C | 4.039991  | 1.544942 | -0.529804 |
| C | 3.101712  | 1.165176 | 0.421297  |
| H | 1.241763  | 2.191849 | 1.093491  |
| H | 1.954501  | 2.509539 | -3.097618 |
| H | 4.369915  | 2.340352 | -2.508619 |
| H | 5.102313  | 1.481318 | -0.308903 |
| H | 3.426885  | 0.813015 | 1.397730  |
| N | -0.036058 | 1.623640 | -1.214793 |
| C | -0.848549 | 2.050659 | -2.241530 |
| O | -0.422906 | 2.665844 | -3.217311 |
| C | -2.327062 | 1.762974 | -2.050802 |
| H | -2.680701 | 2.212886 | -1.115925 |
| H | -2.879859 | 2.181643 | -2.894213 |
| H | -2.521696 | 0.688137 | -1.982085 |
| C | -1.308556 | 3.806514 | 2.839595  |
| H | -1.492766 | 4.688391 | 2.215398  |
| H | -2.265582 | 3.373354 | 3.134544  |
| H | -0.745220 | 4.132666 | 3.717600  |
| C | -0.491069 | 2.812645 | 2.041986  |
| O | 0.750161  | 3.047205 | 1.908628  |
| O | -1.100497 | 1.819411 | 1.542196  |

TS9a

B3LYP SCF energy: -1153.31260041 a.u.  
 B3LYP enthalpy: -1152.820115 a.u.  
 B3LYP free energy: -1152.908622 a.u.  
 M06 SCF energy in solution: -1154.12250013 a.u.  
 M06 enthalpy in solution: -1153.630015 a.u.  
 M06 free energy in solution: -1153.718522 a.u.  
 Three lowest frequencies (cm<sup>-1</sup>): -1103.8720 17.7816 43.9485  
 Imaginary frequency: -1103.8720 cm<sup>-1</sup>

Cartesian coordinates

| ATOM | X         | Y         | Z         |
|------|-----------|-----------|-----------|
| C    | -1.610932 | -0.441285 | -2.183734 |
| C    | -1.420531 | 0.033760  | -0.866785 |
| C    | -2.412444 | -0.276228 | 0.108306  |
| C    | -3.530299 | -1.031288 | -0.255616 |
| C    | -3.684792 | -1.489822 | -1.567259 |
| C    | -2.728547 | -1.190178 | -2.540640 |
| H    | -0.883560 | -0.173745 | -2.946708 |
| H    | -4.298540 | -1.267477 | 0.474447  |
| H    | -4.564042 | -2.071723 | -1.829022 |
| H    | -2.863875 | -1.527873 | -3.564034 |
| C    | -2.281040 | 0.280200  | 1.523400  |
| C    | 2.795103  | -0.220142 | 0.194460  |
| C    | 2.192475  | -0.993925 | 1.219709  |
| C    | 1.287166  | -1.957537 | 0.589453  |
| C    | 2.233125  | -0.652353 | -1.082048 |

|    |           |           |           |
|----|-----------|-----------|-----------|
| C  | 1.381971  | -1.794922 | -0.827092 |
| Rh | 0.565092  | 0.079410  | 0.097981  |
| O  | -1.035622 | 2.622517  | -1.109757 |
| C  | 0.037050  | 3.000611  | -0.549502 |
| O  | 0.810762  | 2.212522  | 0.089603  |
| C  | 0.425210  | 4.456798  | -0.652784 |
| H  | 0.785576  | 4.652300  | -1.669437 |
| H  | -0.451264 | 5.089460  | -0.491121 |
| H  | 1.214141  | 4.702658  | 0.059351  |
| H  | -1.129366 | 1.322105  | -0.954404 |
| C  | 2.434298  | -0.902338 | 2.694581  |
| H  | 1.495459  | -0.944916 | 3.255380  |
| H  | 3.053577  | -1.746099 | 3.026161  |
| H  | 2.951844  | 0.019658  | 2.967958  |
| C  | 0.544558  | -3.039458 | 1.311536  |
| H  | 1.199362  | -3.908349 | 1.462946  |
| H  | 0.209410  | -2.707156 | 2.297616  |
| H  | -0.328400 | -3.376146 | 0.746950  |
| C  | 0.781357  | -2.698778 | -1.856891 |
| H  | 0.665267  | -2.202417 | -2.821922 |
| H  | 1.450406  | -3.557409 | -2.005374 |
| H  | -0.193566 | -3.084496 | -1.551144 |
| C  | 2.672183  | -0.152744 | -2.424858 |
| H  | 3.572912  | -0.689105 | -2.752915 |
| H  | 1.902878  | -0.303806 | -3.186601 |
| H  | 2.915130  | 0.912674  | -2.393643 |
| C  | 3.784915  | 0.890820  | 0.349361  |
| H  | 4.727171  | 0.627326  | -0.146857 |
| H  | 3.410315  | 1.813492  | -0.105269 |
| H  | 4.002817  | 1.097632  | 1.398960  |
| C  | -3.032827 | 1.612366  | 1.655097  |
| H  | -4.104920 | 1.454354  | 1.506286  |
| H  | -2.895121 | 2.036551  | 2.657524  |
| H  | -2.696445 | 2.331090  | 0.900590  |
| C  | -2.696979 | -0.708888 | 2.616268  |
| H  | -2.480199 | -0.281740 | 3.599891  |
| H  | -3.768596 | -0.922207 | 2.571940  |
| H  | -2.153053 | -1.652665 | 2.515935  |
| O  | -0.837379 | 0.534556  | 1.756788  |
| H  | -0.702663 | 1.479806  | 1.944524  |

TS9b

B3LYP SCF energy: -1609.04824767 a.u.

B3LYP enthalpy: -1608.460368 a.u.

B3LYP free energy: -1608.570535 a.u.

M06 SCF energy in solution: -1609.80809352 a.u.

M06 enthalpy in solution: -1609.220214 a.u.

M06 free energy in solution: -1609.330381 a.u.

Three lowest frequencies (cm<sup>-1</sup>): -1068.4889 13.1447 21.7267



Imaginary frequency: -1068.4889 cm-1

Cartesian coordinates

| ATOM | X         | Y         | Z         |
|------|-----------|-----------|-----------|
| C    | -0.002425 | 0.654378  | 2.499402  |
| C    | 0.141706  | 1.283936  | 1.242336  |
| C    | 1.253338  | 2.154280  | 1.042361  |
| C    | 2.153258  | 2.374287  | 2.086963  |
| C    | 1.979072  | 1.741622  | 3.321851  |
| C    | 0.897872  | 0.882544  | 3.535795  |
| H    | -0.863226 | 0.011888  | 2.663359  |
| H    | 2.999421  | 3.041356  | 1.954196  |
| H    | 2.689151  | 1.931027  | 4.122018  |
| H    | 0.758018  | 0.408278  | 4.502880  |
| C    | 1.408136  | 2.885777  | -0.286023 |
| C    | 0.151372  | -1.851968 | 0.023982  |
| C    | -1.138377 | -1.742833 | -0.620176 |
| C    | -0.941192 | -1.430522 | -2.035560 |
| C    | 1.113880  | -1.395275 | -0.936124 |
| C    | 0.440597  | -1.176947 | -2.221744 |
| Rh   | -0.320762 | 0.263653  | -0.642980 |
| O    | -2.177897 | 2.460199  | 0.824999  |
| C    | -2.656808 | 2.145663  | -0.302058 |
| O    | -2.062048 | 1.371918  | -1.129998 |
| C    | -4.006458 | 2.689088  | -0.706421 |
| H    | -4.765929 | 1.925427  | -0.500793 |
| H    | -4.246450 | 3.584197  | -0.130877 |
| H    | -4.027671 | 2.898784  | -1.778369 |
| H    | -1.027236 | 1.817017  | 0.962584  |
| C    | -2.026268 | -1.337543 | -3.060195 |
| H    | -2.848250 | -0.712492 | -2.700395 |
| H    | -1.654203 | -0.922588 | -3.998945 |
| H    | -2.439114 | -2.333451 | -3.251221 |
| C    | 1.120055  | -0.787311 | -3.496546 |
| H    | 1.922136  | -0.072294 | -3.309289 |
| H    | 1.574276  | -1.676757 | -3.953649 |
| H    | 0.414119  | -0.367069 | -4.215849 |
| C    | 0.429055  | -2.403747 | 1.386046  |
| H    | 0.749464  | -3.446884 | 1.266294  |
| H    | 1.241432  | -1.873282 | 1.881976  |
| H    | -0.463804 | -2.384941 | 2.008642  |
| C    | 2.596197  | -1.280729 | -0.758002 |
| O    | 3.280448  | -0.479315 | -1.363411 |
| C    | -2.474668 | -2.123457 | -0.059942 |
| O    | -3.329058 | -2.654295 | -0.735738 |
| O    | -2.610263 | -1.810928 | 1.238075  |
| O    | 3.065175  | -2.175293 | 0.116828  |
| C    | -3.883806 | -2.189903 | 1.850239  |
| H    | -4.685903 | -1.704386 | 1.287935  |
| H    | -4.002685 | -3.271495 | 1.742407  |
| C    | -3.847519 | -1.751964 | 3.299917  |

|   |           |           |           |
|---|-----------|-----------|-----------|
| H | -4.792448 | -2.021811 | 3.782695  |
| H | -3.036645 | -2.246363 | 3.844628  |
| H | -3.720679 | -0.667702 | 3.384041  |
| C | 4.510500  | -2.166076 | 0.337969  |
| H | 4.785280  | -1.184968 | 0.736128  |
| H | 5.000398  | -2.287308 | -0.631732 |
| C | 4.833803  | -3.293871 | 1.296457  |
| H | 5.913462  | -3.316854 | 1.476966  |
| H | 4.330266  | -3.155440 | 2.258442  |
| H | 4.536681  | -4.261697 | 0.881142  |
| O | 0.681944  | 2.075452  | -1.304212 |
| C | 0.750598  | 4.271015  | -0.220486 |
| H | 1.278561  | 4.899586  | 0.502528  |
| H | 0.805433  | 4.770612  | -1.195672 |
| H | -0.293908 | 4.201515  | 0.101282  |
| C | 2.850465  | 2.961296  | -0.792899 |
| H | 2.866132  | 3.444414  | -1.774685 |
| H | 3.472700  | 3.556737  | -0.118337 |
| H | 3.280238  | 1.961355  | -0.889297 |
| H | -0.015399 | 2.618881  | -1.712118 |
